# Supplementary material for: Clinical Efficacy of Single Application Local Drug Delivery and Adjunctive Agents in Nonsurgical Periodontal Therapy: A Systematic Review and Network Meta-Analysis
Source: PubMed Central journal article supplement (PMC7698182; doi:10.3390/pharmaceutics12111086), 2020-11-12
Supplement: pharmaceutics-12-01086-s001.pdf [file pharmaceutics-12-01086-s001.pdf]

# Supplementary Materials: Clinical Efficacy of Single Application Local Drug Delivery and Adjunctive Agents in Nonsurgical Periodontal Therapy: A Systematic Review and Network Meta-Analysis

Oi Leng Tan, Syarida Hasnur Safii and Masfueh Razali \*

## S1. Search strategies for each electronic database

*PubMed (1979 to 31<sup>st</sup> January 2020)*

1. (((((periodontal diseases [mesh]) NOT periodontal cyst [mesh]) NOT gingival diseases [mesh]) NOT periapical diseases [mesh]) NOT peri-implantitis [mesh]) OR periodontitis [tw])
2. (dental prophylaxis [mesh] OR subgingival curettage [mesh] OR dental prophylaxis [tw] OR scaling root planing [tw] OR dental scaling [tw] OR root planing [tw] OR dental cleaning [tw] OR SRP [tw] OR scaling planing [tw] OR ultrasonic therapy [tw] OR ultrasonic therapy [mesh] OR ultrasonic scaling [tw] OR root surface debridement [tw] OR root surface instrumentation [tw] OR periodontal debridement [tw] OR nonsurgical [tw] OR non-surgical [tw]) NOT (ultrasonic surgical procedures [mesh])
3. (randomized controlled trial [pt] OR controlled clinical trial [pt] OR randomized [tiab] OR placebo [tiab] OR clinical trials as topic [mesh:noexp] OR randomly [tiab] OR trial [ti] NOT (animals [mh] NOT humans [mh])) NOT (review [pt] OR systematic review [pt]) [Adapted from Lefebvre et al. (2019)]
4. (adjunct\* [tw]) AND (dental enamel proteins [mh] OR enamel matrix derivative\* [tw] OR Anti-infective agents [mh] OR antibiotic\* [tw] OR antiseptic\* [tw] OR antimicrobial\* [tw] OR antibacterial\* [tw] OR tetracycline [tw] OR chlorhexidine [tw] OR doxycycline [tw] OR metronidazole [tw] OR minocycline [tw] OR hyaluron\* [tw] OR probiotic\* [tw] OR photodynamic therap\* [tw])
5. 1 and 2 and 3 and 4

*MEDLINE via OVID (1946 to 31<sup>st</sup> January 2020)*

1. exp Periodontal Diseases/ or periodonti\$.mp. or (periodontal adj3 pocket\$).mp. or "periodont\$ attachment loss".mp.
2. exp Dental Prophylaxis/ or exp subgingival curettage/ or exp ultrasonic therapy/ or ((dental or oral or teeth or tooth or subgingival) adj6 (scaling or scale\$ or curettage)).mp. or (dental prophylaxis or oral prophylaxis).mp. or (root adj (plane\$ or planing)).mp. or (periodontal adj debridement\$).mp. or (root surface adj debridement\$).mp. or (root surface adj instrumentation\$).mp. or (non?surgical adj3 periodontal).mp.
3. adjunct\$.mp.
4. exp Anti-infective agents/ or (anti?biotic\$ or anti?septic\$ or anti?bacterial\$ or anti?microbial\$).mp. or (tetracycline or chlorhexidine or doxycycline or metronidazole or minocycline or hyaluron\$ or photodynamic or enamel matrix derivative\$ or probiotic\$).mp.

5. randomized controlled trial.pt. or controlled clinical trial.pt. or randomized.ab. or placebo.ab. or drug therapy.fs. or randomly.ab. or trial.ab. or groups.ab. NOT (review.pt or systematic review.pt) [Adapted from Lefebvre et al. (2019)]
6. 1 and 2 and 3 and 4 and 5
7. (exp animal/ or animal.hw. or nonhuman/) not humans.sh.
8. 6 not 7

*EMBASE via OVID (1974 to 31<sup>st</sup> January 2020)*

1. exp Periodontal Diseases/ or periodonti\$.mp. or (periodontal adj3 pocket\$.mp. or "periodont\$ attachment loss".mp.
2. exp Dental Prophylaxis/ or exp subgingival curettage/ or exp ultrasonic therapy/ or ((dental or oral or teeth or tooth or subgingival) adj6 (scaling or scale\$ or curettage)).mp. or (dental prophylaxis or oral prophylaxis).mp. or (root adj (plane\$ or planing)).mp. or (periodontal adj debridement\$.mp. or (root surface adj debridement\$.mp. or (root surface adj instrumentation\$.mp. or (non?surgical adj3 periodontal).mp.
3. adjunct\$.mp.
4. exp Anti-infective agents/ or (anti?biotic\$ or anti?septic\$ or anti?bacterial\$ or anti?microbial\$.mp. or (tetracycline or chlorhexidine or doxycycline or metronidazole or minocycline or hyaluron\$ or photodynamic or enamel matrix derivative\$ or probiotic\$.mp.
5. Randomized controlled trial/ or controlled clinical study/ or random\$.ti,ab. or randomisation/ or intermethod comparison/ or placebo.ti,ab. or (compare or compared or comparison).ti. or ((evaluated or evaluate or evaluating or assessed or assess) and (compare or compared or comparing or comparison)).ab. or (open adj label).ti,ab. or ((double or single or doubly or singly) adj (blind or blinded or blindly)).ti,ab. or double blind procedure/ or parallel group\$1.ti,ab. or (crossover or cross over).ti,ab. or ((assign\$ or match or matched or allocation) adj5 (alternate or group\$1 or intervention\$1 or patient\$1 or subject\$1 or participant\$1)).ti,ab. or (assigned or allocated).ti,ab. or (controlled adj7 (study or design or trial)).ti,ab. or (volunteer or volunteers).ti,ab. or human experiment/ or trial.ti. [Adapted from Lefebvre et al. (2019)]
6. random\$ adj sampl\$ adj7 (cross section\$ or questionnaire\$1 or survey\$ or database\$1).ti,ab. not (comparative study/ or controlled study/ or randomi?ed controlled.ti,ab. or randomly assigned.ti,ab.) or Cross-sectional study/ not (randomized controlled trial/ or controlled clinical study/ or controlled study/ or randomi?ed controlled.ti,ab. or control group\$1.ti,ab.) or (((case adj control\$) and random\$) not randomi?ed controlled).ti,ab. or (Systematic review not (trial or study)).ti. or (nonrandom\$ not random\$.ti,ab. or (Random field\$.ti,ab. or (random cluster adj3 sampl\$.ti,ab. or (review.ab. and review.pt.) not trial.ti. or (we searched).ab. and (review.ti. or review.pt.) or (update review).ab. or (databases adj4 searched).ab. or (rat or rats or mouse or mice or swine or porcine or murine or sheep or lambs or pigs or piglets or rabbit or rabbits or cat or cats or dog or dogs or cattle or bovine or monkey or monkeys or trout or marmoset\$1).ti. and animal experiment/ or Animal experiment/ not (human experiment/ or human/)
7. 5 not 6
8. 1 and 2 and 3 and 4 and 7

*Cochrane Central Register of Controlled Clinical Trials (CENTRAL) (inception to 31<sup>st</sup> January 2020)*

1. MeSH descriptor: [Periodontal Diseases] explode all trees

2. (periodonti\*) OR (periodontal near/3 pocket\*) OR (periodont\* attachment loss)
3. #1 or #2
4. MeSH descriptor: [Dental Prophylaxis] explode all trees
5. (dental or oral or teeth or tooth or subgingival) AND (scaling or scale\* or curettage)
6. (dental prophylaxis OR oral prophylaxis) OR (root\* NEXT plane\* or root\* NEXT planing) OR (periodontal NEXT debridement\*)
7. (root surface NEXT debridement\*) OR (root surface NEXT instrumentation\*) OR ((non surgical or non-surgical or nonsurgical) near/3 periodontal)
8. #4 or #5 or #6 or #7
9. (adjunct\*)
10. MeSH descriptor: [Anti-Infective Agents] explode all trees
11. (anti biotic\* or anti septic\* or anti bacterial\* or anti microbial\* or antibiotic\* or antiseptic\* or antibacterial\* or antimicrobial\* or anti-biotic\* or anti-septic\* or anti-bacterial\* or anti-microbial\*) OR (tetracycline or chlorhexidine or doxycycline or metronidazole or minocycline or hyaluron\* or photodynamic or enamel matrix derivative\* or probiotic\*)
12. #10 or #11
13. #3 and #8 and #9 and #12

*Web of Science (All databases) (1980 to 31<sup>st</sup> January 2020)*

1. TS=((periodonti\*) OR (periodontal near/3 pocket\*) OR (periodont\* attachment loss))
2. TS=((dental or oral or teeth or tooth or subgingival) AND (scaling or scale\* or curettage))
3. TS=((dental prophylaxis OR oral prophylaxis) OR (root\* NEAR/1 plane\* or root\* NEAR/1 planing) OR (periodontal NEAR/1 debridement\*))
4. TS=((root surface debridement\*) OR (root surface instrumentation\*) or (non surgical or non-surgical or nonsurgical))
5. #4 OR #3 OR #2
6. TS=(anti biotic\* or anti septic\* or anti bacterial\* or anti microbial\* or antibiotic\* or antiseptic\* or antibacterial\* or antimicrobial\* or anti-biotic\* or anti-septic\* or anti-bacterial\* or anti-microbial\*)
7. TS=(tetracycline or chlorhexidine or doxycycline or metronidazole or minocycline or hyaluron\* or photodynamic or enamel matrix derivative\* or probiotic\*)
8. #7 OR #6
9. TS=(adjunct\*)
10. TS=(randomized controlled trial or randomised controlled clinical trial OR random\* OR placebo OR clinical trial\*)
11. TI=(review)
12. #10 AND #9 AND #8 AND #5 AND #1
13. #12 NOT #11
14. TS=(animal\* NOT human\*)
15. #13 NOT #14

*US National Institutes of Health Ongoing Trials Register (ClinicalTrials.gov) (inception to 31<sup>st</sup> January 2020)*

Advanced search:

Condition: periodontitis

Other terms: adjunct

Applied filter: Interventional

*World Health Organization International Clinical Trials Registry Platform (inception to 31<sup>st</sup> January 2020)*

Periodontitis AND adjunct

*ProQuest Dissertations and Theses Global (1879 to 31<sup>st</sup> January 2020)*

1. ((periodonti\*) OR ("periodontal near/3 pocket\*") OR ("periodont\* attachment loss")) NOT ti(implant\* or gingivitis or mucositis or orthodont\* or endodont\*)
2. ("dental prophylaxis" OR "oral prophylaxis") OR ("root\* NEAR/1 plane\*" OR "root\* NEAR/1 planing") OR ("periodontal NEAR/1 debridement\*") OR ("root surface debridement\*") OR ("root surface instrumentation\*") OR ("non surgical" or "non-surgical" or "nonsurgical") OR (dental or oral or teeth or tooth or subgingival) AND (scaling or scale\* or curettage)
3. adjunct\*
4. (anti?biotic\* or anti?septic\* or anti?bacterial\* or anti?microbial\*) OR (tetracycline or chlorhexidine or doxycycline or metronidazole or minocycline or hyaluron\* or photodynamic or enamel matrix derivative\* or probiotic\*)
5. randomi?ed control\* trial OR random\* OR placebo OR clinical trial\*
6. ti(review OR (in?vitro) OR (ex?vivo) OR (in?vivo) OR (cross?section\*)) OR retrospective OR observational OR experiment\* OR literature)
7. s1 and s2 and s3 and s4 and s5
8. s7 not s6
9. su((animal\*) NOT (human\*))
10. s8 not s9

**Table S1.** Studies excluded after full-text screening and reasons for exclusion.

| No | Author(s)                                                                                                                      | Year | Title of study                                                                                                                                                                                        | Journal                                                                | Volume | Issue | Page      | Exclusion reason(s)                               |
|----|--------------------------------------------------------------------------------------------------------------------------------|------|-------------------------------------------------------------------------------------------------------------------------------------------------------------------------------------------------------|------------------------------------------------------------------------|--------|-------|-----------|---------------------------------------------------|
| 1  | Ahamed, S.; Jalaluddin, M.; Khalid, I.; Moon, N.; Shaf, T. K.; Ali, F. M.                                                      | 2013 | The use of controlled release locally delivered 10% doxycycline hyclate gel as an adjunct to scaling and root planing in the treatment of chronic periodontitis: clinical and microbiological results | Journal of Contemporary Dental Practice                                | 14     | 6     | 1080-1086 | No randomization                                  |
| 2  | Aimetti, M.; Romano, F.; Guzzi, N.; Carnevale, G.                                                                              | 2011 | One-stage full-mouth disinfection as a therapeutic approach for generalized aggressive periodontitis                                                                                                  | Journal of Periodontology                                              | 82     | 6     | 845-853   | No control                                        |
| 3  | Aimetti, M.; Romano, F.; Torta, I.; Cirillo, D.; Caposio, P.; Romagnoli, R.                                                    | 2004 | Debridement and local application of tetracycline-loaded fibers in the management of persistent periodontitis: Results after 12 months                                                                | Journal of Clinical Periodontology                                     | 31     | 3     | 166-172   | Discontinued adjunct                              |
| 4  | Akıncıbay, H., Şenel, S., and Ay, Z. Y.                                                                                        | 2007 | Application of chitosan gel in the treatment of chronic periodontitis                                                                                                                                 | Journal of Biomedical Materials Research. Part B: Applied Biomaterials | 80     | 2     | 290-296   | Adjunct not commercially available                |
| 5  | Al Habashneh, R., Mashal, M. A., Khader, Y., and Qudah, R.                                                                     | 2019 | Clinical and biological effects of adjunctive photodynamic therapy in refractory periodontitis                                                                                                        | Journal of Lasers in Medical Sciences                                  | 10     | 2     | 139-145   | No randomization                                  |
| 6  | Balata, M. L., Andrade, L. P. D., Santos, D. B. N., Cavalcanti, A. N., Tunes, U. D. R., Ribeiro, E. D. P., and Bittencourt, S. | 2013 | Photodynamic therapy associated with full-mouth ultrasonic debridement in the treatment of severe chronic periodontitis: a randomized-controlled clinical trial                                       | Journal of Applied Oral Science: Revista FOB                           | 21     | 2     | 208-214   | Failing sites retreated per initial basic therapy |
| 7  | Bizzarro, S., Van der Velden, U., and Loos, B. G.                                                                              | 2016 | Local disinfection with sodium hypochlorite as adjunct to basic periodontal therapy: A randomized controlled trial                                                                                    | Journal of Clinical Periodontology                                     | 43     | 9     | 778-788   | Used systemic antimicrobials                      |
| 8  | Blomlöf, L., Bergman, E., Forsgårdh, Å., Foss, L., Larsson, A., Sjöberg, B., Uhlander, L., et al.                              | 2000 | A clinical study of root surface conditioning with an EDTA gel. I. Nonsurgical periodontal treatment                                                                                                  | International Journal of Periodontics & Restorative Dentistry          | 20     | 6     | 561-565   | Experimental adjunct                              |

|    |                                                                                                                              |      |                                                                                                                                                                               |                                                   |    |   |              |                                                   |
|----|------------------------------------------------------------------------------------------------------------------------------|------|-------------------------------------------------------------------------------------------------------------------------------------------------------------------------------|---------------------------------------------------|----|---|--------------|---------------------------------------------------|
| 9  | Bogren, A., Teles, R. P.,<br>Torresyap, G., Haffajee, A.<br>D., Socransky, S. S., and<br>Wennström, J. L.                    | 2008 | Locally delivered doxycycline during<br>supportive periodontal therapy: a 3-year study                                                                                        | Journal of<br>Periodontology                      | 79 | 5 | 827-<br>835  | Repeated<br>application                           |
| 10 | Bosco, J., Lopes, B., Bosco,<br>A. F., Spolidorio, D. M.,<br>and Marcantonio, R. A.                                          | 2009 | Local application of tetracycline solution with<br>a microbrush: An alternative treatment for<br>persistent periodontitis                                                     | Quintessence<br>International                     | 40 | 1 | 29-40        | Adjunct not<br>commercially<br>available          |
| 11 | Bundidpun, P.,<br>Srisuwantha, R., and<br>Laosrisin, N.                                                                      | 2018 | Clinical effects of photodynamic therapy as an<br>adjunct to full-mouth ultrasonic scaling and<br>root planing in treatment of chronic<br>periodontitis                       | Laser Therapy                                     | 27 | 1 | 33-39        | Adjuncts<br>administered<br>one week after<br>SRP |
| 12 | Cappuyns, I., Cionca, N.,<br>Wick, P., Giannopoulou,<br>C., and Mombelli, A.                                                 | 2012 | Treatment of residual pockets with<br>photodynamic therapy, diode laser, or deep<br>scaling. A randomized, split-mouth controlled<br>clinical trial                           | Lasers in Medical<br>Science                      | 27 | 5 | 979-<br>986  | Not used as<br>adjunct                            |
| 13 | Carvalho, J., Novak, M. J.,<br>and Mota, L. F.                                                                               | 2007 | Evaluation of the effect of subgingival<br>placement of chlorhexidine chips as an adjunct<br>to scaling and root planing                                                      | Journal of<br>Periodontology                      | 78 | 6 | 997-<br>1001 | Repeated<br>application                           |
| 14 | Carvalho, V.F., Andrade,<br>P.V., Rodrigues, M.F.,<br>Hirata, M.H., Hirata, R.D.,<br>Pannuti, C.M., De Micheli,<br>G. et al. | 2015 | Antimicrobial photodynamic effect to treat<br>residual pockets in periodontal patients: a<br>randomized controlled clinical trial                                             | Journal of Clinical<br>Periodontology             | 42 | 5 | 440-<br>447  | Not used as<br>adjunct                            |
| 15 | Chiang, C. P., Hsieh, O.,<br>Tai, W. C., Chen, Y. J., and<br>Chang, P. C.                                                    | 2019 | Clinical outcomes of adjunctive indocyanine<br>green-diode lasers therapy for treating<br>refractory periodontitis: A randomized<br>controlled trial with in vitro assessment | Journal of The<br>Formosan Medical<br>Association |    |   |              | Incomplete<br>data                                |
| 16 | Cortelli, J.R., Aquino, D.R.,<br>Cortelli, S.C., Carvalho-F,<br>J., Roman-Torres, C.V., and<br>Costa, F.O.                   | 2008 | A double-blind randomized clinical trial of<br>subgingival minocycline for chronic<br>periodontitis                                                                           | Journal of Oral<br>Science                        | 50 | 3 | 259-<br>265  | No CAL data                                       |
| 17 | Cortelli, J. R., Querido, S.<br>M. R., Aquino, D. R.,<br>Ricardo, L. H., and Pallos,<br>D.                                   | 2006 | Longitudinal clinical evaluation of adjunct<br>minocycline in the treatment of chronic<br>periodontitis                                                                       | Journal of<br>Periodontology                      | 77 | 2 | 161-<br>166  | No CAL data                                       |
| 18 | Cortelli, S. C., Cavallini, F.,<br>Alves, M. F. R., Bezerra, A.                                                              | 2009 | Clinical and microbiological effects of an<br>essential-oil-containing mouth rinse applied in<br>the "one-stage full-mouth disinfection"                                      | Clinical Oral<br>Investigations                   | 13 | 2 | 189-<br>194  | No CAL data                                       |

|    |                                                                                                                                  |      |                                                                                                                                                     |                                                 |     |   |         |                                                   |
|----|----------------------------------------------------------------------------------------------------------------------------------|------|-----------------------------------------------------------------------------------------------------------------------------------------------------|-------------------------------------------------|-----|---|---------|---------------------------------------------------|
|    | A., Queiroz, C. S., and Cortelli, J. R.                                                                                          |      | protocol—a randomized doubled-blinded preliminary study                                                                                             |                                                 |     |   |         |                                                   |
| 19 | Cortelli, S.C., Cortelli, J.R., Holzhausen, M., Franco, G.C.N., Rebelo, R.Z., Sonagere, A.S., Queiroz, C.D.S. et al.             | 2009 | Essential oils in one-stage full-mouth disinfection: double-blind, randomized clinical trial of long-term clinical, microbial, and salivary effects | Journal of Clinical Periodontology              | 36  | 4 | 333-342 | No CAL data                                       |
| 20 | Cosyn, Jan; Wyn, Iris; De Rouck, Tim; Sabzevar, Mehran Moradi                                                                    | 2006 | Long-term clinical effects of a chlorhexidine varnish implemented treatment strategy for chronic periodontitis                                      | Journal of Periodontology                       | 77  | 3 | 406-415 | No CAL data                                       |
| 21 | da Cruz Andrade, P.V., Alves, V.T.E., de Carvalho, V.F., Rodrigues, M.D.F., Pannuti, C.M., Holzhausen, M., De Micheli, G. et al. | 2017 | Photodynamic therapy decrease immune-inflammatory mediators levels during periodontal maintenance                                                   | Lasers in Medical Science                       | 32  | 1 | 9-17    | Not used as adjunct                               |
| 22 | D'aiuto, F., Parkar, M., Nibali, L., Suvar, J., Lessem, J., and Tonetti, M. S.                                                   | 2006 | Periodontal infections cause changes in traditional and novel cardiovascular risk factors: Results from a randomized controlled clinical trial      | American Heart Journal                          | 151 | 5 | 977-984 | No PPD/CAL data                                   |
| 23 | Dannewitz, B., Lippert, K., Lang, N. P., Tonetti, M. S., and Eickholz, P.                                                        | 2009 | Supportive periodontal therapy of furcation sites: Non-surgical instrumentation with or without topical doxycycline                                 | Journal of Clinical Periodontology              | 36  | 6 | 514-522 | Subset of Tonetti 2012                            |
| 24 | De Lissovoy, G., Rentz, A. M., Dukes, E. M., Eaton, C. A., Jeffcoat, M. K., Killoy, W. J., and Finkelman, R. D.                  | 1999 | The cost-effectiveness of a new chlorhexidine delivery system in the treatment of adult periodontitis                                               | Journal of the American Dental Association      | 130 | 6 | 855-862 | Extension of Jeffcoat 1998                        |
| 25 | Dean, J. W., Branch-Mays, G. L., Hart, T. C., Reinhardt, R. A., Shapiro, B., Santucci, E. A., and Lessem, J.                     | 2003 | Topically applied minocycline microspheres: why it works                                                                                            | Compendium of Continuing Education in Dentistry | 24  | 4 | 247-258 | No control                                        |
| 26 | Del Peloso Ribeiro, É., Bittencourt, S., Ambrosano, G. M. B., Nociti Jr, F. H., Sallum, E. A., Sallum, A. W., and Casati, M. Z.  | 2006 | Povidone-iodine used as an adjunct to non-surgical treatment of furcation involvements                                                              | Journal of Periodontology                       | 77  | 2 | 211-217 | Failing sites retreated per initial basic therapy |

|    |                                                                                                                  |      |                                                                                                                                                                                                                                              |                                                                                                                                               |                 |    |         |                                          |
|----|------------------------------------------------------------------------------------------------------------------|------|----------------------------------------------------------------------------------------------------------------------------------------------------------------------------------------------------------------------------------------------|-----------------------------------------------------------------------------------------------------------------------------------------------|-----------------|----|---------|------------------------------------------|
| 27 | Drisko, C.L., Cobb, C.M., Killoy, W.J., Michalowicz, B.S., Pihlstrom, B.L., Lowenguth, R.A., Caton, J.G., et al. | 1995 | Evaluation of periodontal treatments using controlled-release tetracycline fibers: clinical response                                                                                                                                         | Journal of Periodontology                                                                                                                     | 66              | 8  | 692-699 | Discontinued adjunct                     |
| 28 | DRKS00005389                                                                                                     | 2014 | Clinical outcomes of adjunctive antimicrobial photodynamic therapy in the treatment of patients with severe chronic periodontitis—a controlled randomized clinical trial                                                                     | <a href="http://www.who.int/trialsearch/trial2.aspx?trialid=drks00005389">http://www.who.int/trialsearch/trial2.aspx?trialid=drks00005389</a> | Incomplete data |    |         |                                          |
| 29 | Eickholz, P., Kim, T.S., Bürklin, T., Schacher, B., Renggli, H.H., Schaecken, M.T., Holle, R., et al.            | 2002 | Non-surgical periodontal therapy with adjunctive topical doxycycline: a double-blind randomized controlled multicenter study                                                                                                                 | Journal of Clinical Periodontology                                                                                                            | 29              | 2  | 108-117 | 15% DH not commercially available        |
| 30 | Feng, H.S., Bernardo, C.C., Sonoda, L.L., Hayashi, F., Romito, G.A., De Lima, L.A.P.A., Lotufo, R.F.M. et al.    | 2011 | Subgingival ultrasonic instrumentation of residual pockets irrigated with essential oils: a randomized controlled trial                                                                                                                      | Journal of Clinical Periodontology                                                                                                            | 38              | 7  | 637-643 | Adjuncts administered one week after SRP |
| 31 | Flemmig, T. F., Weinacht, S., Rüdiger, S., Rumetsch, M., Jung, A., and Klaiber, B.                               | 1996 | Adjunctive controlled topical application of tetracycline HCl in the treatment of localized persistent or recurrent periodontitis: Effects on clinical parameters and elastase- $\alpha$ 1-proteinase inhibitor in gingival crevicular fluid | Journal of Clinical Periodontology                                                                                                            | 23              | 10 | 914-921 | Discontinued adjunct                     |
| 32 | Friesen, L. R., Williams, K. B., Krause, L. S., and Killoy, W. J.                                                | 2002 | Controlled local delivery of tetracycline with polymer strips in the treatment of periodontitis                                                                                                                                              | Journal of Periodontology                                                                                                                     | 73              | 1  | 13-19   | Adjunct not commercially available       |
| 33 | Fulvi, L., Polizzi, E. and Calderini, A.                                                                         | 2011 | Effectiveness of local antibiotic therapy plus scaling/root-planing: An experimental split-mouth study                                                                                                                                       | Prevenzione E Assistenza Dentale                                                                                                              | 37              | 2  | 33-43   | Adjunct not commercially available       |
| 34 | Garrett, S., Johnson, L., Drisko, C.H., Adams, D.F., Bandt, C., Beiswanger, B., Bogle, G., et al.                | 1999 | Two multi-center studies evaluating locally delivered doxycycline hyclate, placebo control, oral hygiene, and scaling and root planing in the treatment of periodontitis                                                                     | Journal of Periodontology                                                                                                                     | 70              | 5  | 490-503 | Not used as adjunct                      |
| 35 | Garrett, S., Adams, D.F., Bogle, G., Donly, K., Hastings Drisko, C.,                                             | 2000 | The effect of locally delivered controlled-release doxycycline or scaling and root planing on periodontal maintenance patients over 9 months                                                                                                 | Journal of Periodontology                                                                                                                     | 71              | 1  | 22-30   | Subset of Garrett 1999                   |



| Hallmon, W.W., Brady<br>Hancock, E., et al. |                                                                                                                 |      |                                                                                                                                                                                                                                                                          |                                             |    |    |           |                                                   |
|---------------------------------------------|-----------------------------------------------------------------------------------------------------------------|------|--------------------------------------------------------------------------------------------------------------------------------------------------------------------------------------------------------------------------------------------------------------------------|---------------------------------------------|----|----|-----------|---------------------------------------------------|
| 36                                          | Giannelli, M., Formigli, L., Lorenzini, L., and Bani, D.                                                        | 2012 | Combined photoablative and photodynamic diode laser therapy as an adjunct to non-surgical periodontal treatment. A randomized split-mouth clinical trial                                                                                                                 | Journal of Clinical Periodontology          | 39 | 10 | 962-970   | Adjunct administered one week after SRP           |
| 37                                          | Giannelli, M., Formigli, L., Lorenzini, L., and Bani, D.                                                        | 2015 | Efficacy of combined photoablative-photodynamic diode laser therapy adjunctive to scaling and root planing in periodontitis: randomized split-mouth trial with 4-year follow-up                                                                                          | Photomedicine and Laser Surgery             | 33 | 9  | 473-480   | Adjunct administered one week after SRP           |
| 38                                          | Giannelli, M., Materassi, F., Fossi, T., Lorenzini, L., and Bani, D.                                            | 2018 | Treatment of severe periodontitis with a laser and light-emitting diode (LED) procedure adjunctive to scaling and root planing: a double-blind, randomized, single-center, split-mouth clinical trial investigating its efficacy and patient-reported outcomes at 1 year | Lasers in Medical Science                   | 33 | 5  | 991-1002  | Adjunct administered one week after SRP           |
| 39                                          | Giannopoulou, C., Cappuyens, I., Cancela, J., Cionca, N., and Mombelli, A.                                      | 2012 | Effect of photodynamic therapy, diode laser, and deep scaling on cytokine and acute-phase protein levels in gingival crevicular fluid of residual periodontal pockets                                                                                                    | Journal of Periodontology                   | 83 | 8  | 1018-1027 | Not used as adjunct                               |
| 40                                          | Goh, E. X., Tan, K. S., Chan, Y. H., and Lim, L. P.                                                             | 2017 | Effects of root debridement and adjunctive photodynamic therapy in residual pockets of patients on supportive periodontal therapy: A randomized split-mouth trial                                                                                                        | Photodiagnosis And Photodynamic Therapy     | 18 |    | 342-348   | Failing sites retreated per initial basic therapy |
| 41                                          | Gonzales, J. R., Harnack, L., Schmitt-Corsitto, G., Boedeker, R. H., Chakraborty, T., Domann, E., and Meyle, J. | 2011 | A novel approach to the use of subgingival controlled-release chlorhexidine delivery in chronic periodontitis: A randomized clinical trial                                                                                                                               | Journal of Periodontology                   | 82 | 8  | 1131-1139 | Adjunct administered before SRP                   |
| 42                                          | Gopinath, V., Ramakrishnan, T., Emmadi, P., Ambalavanan, N., and Mammen, B.                                     | 2009 | Effect of a controlled release device containing minocycline microspheres on the treatment of chronic periodontitis: A comparative study                                                                                                                                 | Journal of Indian Society of Periodontology | 13 | 2  | 79        | No mention of method of randomization             |
| 43                                          | Grisi, D. C., Salvador, S. L., Figueiredo, L. C., Souza, S. L., Novaes Jr, A. B., and Grisi, M. F.              | 2002 | Effect of a controlled-release chlorhexidine chip on clinical and microbiological parameters of periodontal syndrome                                                                                                                                                     | Journal of clinical periodontology          | 29 | 10 | 875-881   | Repeated application                              |

|    |                                                                                                             |      |                                                                                                                                                                                     |                                                                         |     |    |           |                                                              |
|----|-------------------------------------------------------------------------------------------------------------|------|-------------------------------------------------------------------------------------------------------------------------------------------------------------------------------------|-------------------------------------------------------------------------|-----|----|-----------|--------------------------------------------------------------|
| 44 | Grzech-Leśniak, K., Gaspirc, B., and Sculean, A.                                                            | 2019 | Clinical and microbiological effects of multiple applications of antibacterial photodynamic therapy in periodontal maintenance patients. A randomized controlled clinical study     | Photodiagnosis And Photodynamic Therapy                                 | 27  |    | 44-50     | No CAL data                                                  |
| 45 | Hagiwara, S., Iida, M., and Ishikawa, I.                                                                    | 1993 | Clinical and microbiological study concerning effects of scaling and root planing. 2. The effects of mechanical debridement until one year and of minocycline application topically | Kokubyo Gakkai Zasshi. The Journal of The Stomatological Society, Japan | 60  | 2  | 301-312   | No mention of method of randomization                        |
| 46 | Harmouche, L., Courval, A., Mathieu, A., Petit, C., Huck, O., Severac, F., and Davideau, J. L.              | 2019 | Impact of tooth-related factors on photodynamic therapy effectiveness during active periodontal therapy: A 6-month split-mouth randomized clinical trial                            | Photodiagnosis and photodynamic therapy                                 | 27  |    | 167-172   | Repeated application                                         |
| 47 | Henke, C.J.; Genco, R.J.; Killoy, W.J.; Miller, D.P.; Evans, C.J.; Finkelman, R.D.; Villa, K.F. et al.      | 2001 | An economic evaluation of a chlorhexidine chip for treating chronic periodontitis: the CHIP (chlorhexidine in periodontitis) study                                                  | Journal of The American Dental Association (1939)                       | 132 | 11 | 1557-1569 | No final PPD/CAL reported                                    |
| 48 | Ioannou, I., Dimitriadis, N., Papadimitriou, K., Vouros, I., Sakellari, D., and Konstantinidis, A.          | 2011 | The effect of locally delivered doxycycline in the treatment of chronic periodontitis. A clinical and microbiological cohort study                                                  | Journal of Oral & Maxillofacial Research                                | 1   | 4  | e1        | No randomization, no control                                 |
| 49 | Jentsch, H.R., Rocuzzo, M., Marini, L., Kasaj, A., Fimmers, R., Jepsen, S.                                  | 2018 | 0059: Flapless application of enamel matrix derivative (EMD) as an adjunct to scaling and root planing – a multi-center RCT                                                         | Journal of Clinical Periodontology                                      | 45  |    | 26-27     | Less than 6 months duration                                  |
| 50 | Jeffcoat, M. K., Palcanis, K. G., Weatherford, T. W., Reese, M., Geurs, N. C., and Flashner, M.             | 2000 | Use of a biodegradable chlorhexidine chip in the treatment of adult periodontitis: clinical and radiographic findings                                                               | Journal of Periodontology                                               | 71  | 2  | 256-262   | Subset of Jeffcoat 1998                                      |
| 51 | Jeffcoat, M.K., Bray, K.S., Ciancio, S.G., Dentino, A.R., Fine, D.H., Gordon, J.M., Gunsolley, J.C., et al. | 1998 | Adjunctive use of a subgingival controlled-release chlorhexidine chip reduces probing depth and improves attachment level compared with scaling and root planing alone              | Journal of Periodontology                                               | 69  | 9  | 989-997   | Only adjunct repeated, not SRP; possible bias toward adjunct |
| 52 | Jones, A. A., Kornman, K. S., Newbold, D. A., and Manwell, M. A.                                            | 1994 | Clinical and microbiological effects of controlled-release locally delivered minocycline in periodontitis                                                                           | Journal of Periodontology                                               | 65  | 11 | 1058-1066 | Adjunct not commercially available                           |

|    |                                                                                                             |      |                                                                                                                                                                                                                                                     |                                                   |     |         |           |                                    |
|----|-------------------------------------------------------------------------------------------------------------|------|-----------------------------------------------------------------------------------------------------------------------------------------------------------------------------------------------------------------------------------------------------|---------------------------------------------------|-----|---------|-----------|------------------------------------|
| 53 | Kanoriya, D., Singhal, S., Garg, V., Pradeep, A. R., Garg, S., and Kumar, A.                                | 2018 | Clinical efficacy of subgingivally delivered 0.75% boric acid gel as an adjunct to mechanotherapy in chronic periodontitis: A randomized, controlled clinical trial                                                                                 | Journal of Investigative and Clinical Dentistry   | 9   | e1227-1 |           | Adjunct not commercially available |
| 54 | Kasaj, A., Chiriachide, A., and Willershausen, B.                                                           | 2007 | The adjunctive use of a controlled-release chlorhexidine chip following treatment with a new ultrasonic device in supportive periodontal therapy: A prospective, controlled clinical study                                                          | International Journal of Dental Hygiene           | 5   | 4       | 225-231   | Repeated application               |
| 55 | Katsikanis, F., Strakas, D., and Vouros, I.                                                                 | 2019 | The application of antimicrobial photodynamic therapy (aPDT, 670 nm) and diode laser (940 nm) as adjunctive approach in the conventional cause-related treatment of chronic periodontal disease: A randomized controlled split-mouth clinical trial | Clinical Oral Investigations                      |     |         | 1-7       | Repeated application               |
| 56 | Kerry, G.                                                                                                   | 1994 | Tetracycline-loaded fibers as adjunctive treatment in periodontal disease                                                                                                                                                                           | Journal of The American Dental Association (1939) | 125 | 9       | 1199-1203 | Discontinued adjunct               |
| 57 | Killeen, A. C., Harn, J. A., Erickson, L. M., Yu, F., and Reinhardt, R. A.                                  | 2016 | Local minocycline effect on inflammation and clinical attachment during periodontal maintenance: Randomized clinical trial                                                                                                                          | Journal of Periodontology                         | 87  | 10      | 1149-1157 | Original study of Killeen 2018     |
| 58 | Killeen, A. C., Harn, J. A., Jensen, J., Yu, F., Custer, S., and Reinhardt, R. A.                           | 2018 | Two-year randomized clinical trial of adjunctive minocycline microspheres in periodontal maintenance                                                                                                                                                | Journal of Dental Hygiene                         | 92  | 4       | 51-58     | Repeated application               |
| 59 | Killooy, W. J.                                                                                              | 1999 | Assessing the effectiveness of locally delivered chlorhexidine in the treatment of periodontitis                                                                                                                                                    | Journal of The American Dental Association (1939) | 130 | 4       | 567-570   | Review                             |
| 60 | Kim, T. S., Burklin, T., Schacher, B., Ratka-Kruger, P., Schaecken, M. T., Renggli, H. H., and Eickholz, P. | 2003 | Local application of antibiotics versus mechanical debridement in supportive periodontal treatment                                                                                                                                                  | Deutsche Zahnärztliche Zeitschrift                | 58  | 10      | 579-583   | Not used as adjunct                |
| 61 | Kinane, D. F., and Radvar, M.                                                                               | 1999 | A six-month comparison of three periodontal local antimicrobial therapies in persistent periodontal pockets                                                                                                                                         | Journal of Periodontology                         | 70  | 1       | 1-7       | Discontinued adjunct               |
| 62 | Kolbe, M.F., Ribeiro, F.V., Luchesi, V.H., Casarin, R.C., Sallum, E.A., Nociti                              | 2014 | Photodynamic therapy during supportive periodontal care: clinical, microbiologic, immunoinflammatory, and patient-centered                                                                                                                          | Journal of Periodontology                         | 85  | 8       | e277-e286 | Not used as adjunct                |

|    |                                                                                          |      |                                                                                                                                                                                                                                      |                                                                      |    |   |           |                                      |
|----|------------------------------------------------------------------------------------------|------|--------------------------------------------------------------------------------------------------------------------------------------------------------------------------------------------------------------------------------------|----------------------------------------------------------------------|----|---|-----------|--------------------------------------|
|    | Jr, F.H., Ambrosano, G.M., et al.                                                        |      | performance in a split-mouth randomized clinical trial                                                                                                                                                                               |                                                                      |    |   |           |                                      |
| 63 | Kondreddy, K., Ambalavanan, N., Ramakrishna, T., and Kumar, R. S.                        | 2012 | Effectiveness of a controlled release chlorhexidine chip (PerioColTM-CG) as an adjunctive to scaling and root planing when compared to scaling and root planing alone in the treatment of chronic periodontitis: A comparative study | Journal of Indian Society of Periodontology                          | 16 | 4 | 553-557   | No randomization                     |
| 64 | Konuganti, K.; Kumar, A.                                                                 | 2016 | Efficacy of subgingivally delivered flurbiprofen and chlorhexidine chip in the treatment of chronic periodontitis: A randomized controlled clinical trial                                                                            | International Journal of Pharmaceutical Sciences Review and Research | 40 | 1 | 149-153   | Adjunct not commercially available   |
| 65 | Koshy, G., Kawashima, Y., Kiji, M., Nitta, H., Umeda, M., Nagasawa, T., and Ishikawa, I. | 2005 | Effects of single-visit full-mouth ultrasonic debridement versus quadrant-wise ultrasonic debridement                                                                                                                                | Journal of Clinical Periodontology                                   | 32 | 7 | 734-743   | No passive control                   |
| 66 | Laleman, I., Pauwels, M., Quirynen, M., and Teughels, W.                                 | 2020 | A dual-strain Lactobacilli reuteri probiotic improves the treatment of residual pockets: A randomized controlled clinical trial                                                                                                      | Journal of Clinical Periodontology                                   | 47 |   | 43-53     | Administered use of lozenges at home |
| 67 | Lauenstein, M., Kaufmann, M., and Persson, G. R.                                         | 2013 | Clinical and microbiological results following nonsurgical periodontal therapy with or without local administration of piperacillin/tazobactam                                                                                       | Clinical Oral Investigations                                         | 17 | 7 | 1645-1660 | No CAL data                          |
| 68 | Leonhardt, Å., Bergström, C., Krok, L., and Cardaropoli, G.                              | 2006 | Healing following ultrasonic debridement and PVP-iodine in individuals with severe chronic periodontal disease: A randomized, controlled clinical study                                                                              | Acta Odontologica Scandinavica                                       | 64 | 5 | 262-266   | PD in %                              |
| 69 | Leonhardt, Å., Bergström, C., Krok, L., and Cardaropoli, G.                              | 2007 | Microbiological effect of the use of an ultrasonic device and iodine irrigation in patients with severe chronic periodontal disease: A randomized controlled clinical study                                                          | Acta Odontologica Scandinavica                                       | 65 | 1 | 52-59     | No PPD/CAL data                      |
| 70 | Lie, T., Bruun, G., and Bøe, O. E.                                                       | 1998 | Effects of topical metronidazole and tetracycline in treatment of adult periodontitis                                                                                                                                                | Journal of Periodontology                                            | 69 | 7 | 819-827   | Discontinued adjunct                 |
| 71 | Lulic, M., Leiggener Görög, I., Salvi, G. E., Ramseier, C.                               | 2009 | One-year outcomes of repeated adjunctive photodynamic therapy during periodontal                                                                                                                                                     | Journal of Clinical Periodontology                                   | 36 | 8 | 661-666   | Repeated application                 |

|    |                                                                                                                                |      |                                                                                                                                                                                                         |                                    |    |   |           |                                                                 |
|----|--------------------------------------------------------------------------------------------------------------------------------|------|---------------------------------------------------------------------------------------------------------------------------------------------------------------------------------------------------------|------------------------------------|----|---|-----------|-----------------------------------------------------------------|
|    | A., Mattheos, N., and Lang, N. P.                                                                                              |      | maintenance: A proof-of-principle randomized-controlled clinical trial                                                                                                                                  |                                    |    |   |           |                                                                 |
| 72 | Machion, L., Andia, D. C., Lecio, G., Nociti Jr, F. H., Casati, M. Z., Sallum, A. W., and Sallum, E. A.                        | 2006 | Locally delivered doxycycline as an adjunctive therapy to scaling and root planing in the treatment of smokers: A 2-year follow-up                                                                      | Journal of Periodontology          | 77 | 4 | 606-613   | Extension of Machion 2004                                       |
| 73 | McColl, E., Patel, K., Dahlen, G., Tonetti, M., Graziani, F., Suvan, J., and Laurell, L.                                       | 2006 | Supportive periodontal therapy using mechanical instrumentation or 2% minocycline gel: A 12-month randomized, controlled, single masked pilot study                                                     | Journal of Clinical Periodontology | 33 | 2 | 141-150   | Not used as adjunct                                             |
| 74 | Megally, A., Zekeridou, A., Cancela, J., Giannopoulou, C., and Mombelli, A.                                                    | 2019 | Short ultrasonic debridement with adjunctive low-concentrated hypochlorite/amino acid gel during periodontal maintenance: Randomized clinical trial of 12 months                                        | Clinical Oral Investigations       |    |   | 1 - 9     | Repeated application                                            |
| 75 | Meinberg, T. A., Barnes, C. M., Dunning, D. G., and Reinhardt, R. A.                                                           | 2002 | Comparison of conventional periodontal maintenance versus scaling and root planing with subgingival minocycline                                                                                         | Journal of Periodontology          | 73 | 2 | 167-172   | No randomization                                                |
| 76 | Mızrak, T., Güncü, G. N., Çağlayan, F., Balcı, T. A., Aktar, G. S., and İpek, F.                                               | 2006 | Effect of a controlled-release chlorhexidine chip on clinical and microbiological parameters and prostaglandin E2 levels in gingival crevicular fluid                                                   | Journal of Periodontology          | 77 | 3 | 437-443   | Repeated application                                            |
| 77 | Modanese, D. D. G., Tiosso-Tamburi, R., de Goes, V. F. F., de Cássia Bergamaschi, C., Martinez, E. F., Napimoga, M. H., et al. | 2016 | Clinical and immunoinflammatory evaluation of one-stage full-mouth ultrasonic debridement as a therapeutic approach for smokers with generalized aggressive periodontitis: A short-term follow-up study | Journal of Periodontology          | 87 | 9 | 1012-1021 | Not used as adjunct                                             |
| 78 | Mongardini, C., van Steenberghe, D., Dekeyser, C., and Quirynen, M.                                                            | 1999 | One stage full- versus partial-mouth disinfection in the treatment of chronic adult or generalized early-onset periodontitis. I. Long-term clinical observations                                        | Journal of Periodontology          | 70 | 6 | 632-645   | Comparison of different SRP                                     |
| 79 | Müller, N., Moëne, R., Cancela, J. A., and Mombelli, A.                                                                        | 2014 | Subgingival air-polishing with erythritol during periodontal maintenance: Randomized clinical trial of twelve months                                                                                    | Journal of Clinical Periodontology | 41 | 9 | 883-889   | CHX content not with the intention to have a therapeutic effect |

|    |                                                                                                          |      |                                                                                                                                                                         |                                                                                                               |                 |   |           |                                         |  |
|----|----------------------------------------------------------------------------------------------------------|------|-------------------------------------------------------------------------------------------------------------------------------------------------------------------------|---------------------------------------------------------------------------------------------------------------|-----------------|---|-----------|-----------------------------------------|--|
| 80 | NCT02487186                                                                                              | 2015 | Locally delivered doxycycline adjunct to nonsurgical periodontal therapy                                                                                                | <a href="https://clinicaltrials.gov/show/nct02487186">https://clinicaltrials.gov/show/nct02487186</a>         | Incomplete data |   |           |                                         |  |
| 81 | NCT04036890                                                                                              | 2019 | Local minocycline in patients under supportive periodontal therapy                                                                                                      | <a href="https://clinicaltrials.gov/ct2/show/nct04036890">https://clinicaltrials.gov/ct2/show/nct04036890</a> | Incomplete data |   |           |                                         |  |
| 82 | Newman, M. G., Kornman, K. S., and Doherty, F. M.                                                        | 1994 | A 6-month multi-center evaluation of adjunctive tetracycline fiber therapy used in conjunction with scaling and root planing in maintenance patients: Clinical results  | Journal of Periodontology                                                                                     | 65              | 7 | 685-691   | Discontinued adjunct                    |  |
| 83 | Okuda, K., Wolff, L., Oliver, R., Osbom, J., Stoltenberg, J., Bereuter, J., Anderson, L., et al.         | 1992 | Minocycline slow-release formulation effect on subgingival bacteria                                                                                                     | Journal of Periodontology                                                                                     | 63              | 2 | 73-79     | No PPD/CAL data                         |  |
| 84 | Oringer, R. J., Van, T. D., and Lessem, J.                                                               | 2002 | The challenge of treating periodontal patients who smoke – the efficacy of Arestin                                                                                      | Journal of The International Academy of Periodontology                                                        | 4               | 3 | 89-94     | Mix subpopulation of 2 rcts             |  |
| 85 | Paquette, D., Oringer, R., Lessem, J., Offenbacher, S., Genco, R., Persson, G.R., Santucci, E.A., et al. | 2003 | Locally delivered minocycline microspheres for the treatment of periodontitis in smokers                                                                                | Journal of Clinical Periodontology                                                                            | 30              | 9 | 787-794   | Subset of Williams 2001; no CAL data    |  |
| 86 | Pedrazzoli, V., Kilian, M., and Karring, T.                                                              | 1992 | Comparative clinical and microbiological effects of topical subgingival application of metronidazole 25% dental gel and scaling in the treatment of adult periodontitis | Journal of Clinical Periodontology                                                                            | 19              | 9 | 715-722   | Not used as adjunct                     |  |
| 87 | Pejčić, A., Kojović, D., Minić, I., Mirković, D., Denić, M., and Stojanović, M.                          | 2015 | Therapeutic efficacy of clindamycin gel as an adjunct to scaling and root planing therapy in chronic periodontal disease                                                | Acta Clinica Croatica                                                                                         | 54              | 1 | 46-50     | Adjunct not commercially available      |  |
| 88 | Petelin, M., Perkič, K., Seme, K., and Gašpirc, B.                                                       | 2015 | Effect of repeated adjunctive antimicrobial photodynamic therapy on subgingival periodontal pathogens in the treatment of chronic periodontitis                         | Lasers in Medical Science                                                                                     | 30              | 6 | 1647-1656 | Repeated application                    |  |
| 89 | Pietruska, M., Paniczko, A., Waszkiel, D., Pietruski, J., and Bernaczyk, A.                              | 2006 | Efficacy of local treatment with chlorhexidine gluconate drugs on the clinical status of periodontium in chronic periodontitis patients                                 | Advances in Medical Sciences                                                                                  | 51              | 7 | 162-165   | Adjunct administered one week after SRP |  |

|    |                                                                                                                    |      |                                                                                                                                                                                 |                                             |    |     |         |                                                   |
|----|--------------------------------------------------------------------------------------------------------------------|------|---------------------------------------------------------------------------------------------------------------------------------------------------------------------------------|---------------------------------------------|----|-----|---------|---------------------------------------------------|
| 90 | Quirynen, M., De Soete, M., Boschmans, G., Pauwels, M., Coucke, W., Teughels, W., and Van Steenberghe, D.          | 2006 | Benefit of "one-stage full-mouth disinfection" is explained by disinfection and root planing within 24 hours: A randomized controlled trial                                     | Journal of Clinical Periodontology          | 33 | 9   | 639-647 | Comparison of supragingival antiseptics           |
| 91 | Quirynen, M., Mongardini, C., De Soete, M., Pauwels, M., Coucke, W., Van Eldere, J., and Van Steenberghe, D.       | 2000 | The role of chlorhexidine in the one-stage full-mouth disinfection treatment of patients with advanced adult periodontitis. Long-term clinical and microbiological observations | Journal of Clinical Periodontology          | 27 | 8   | 578-589 | Comparison of different SRP                       |
| 92 | Ratka-Krüger, P., Schacher, B., Bürklin, T., Böddinghaus, B., Holle, R., Renggli, H.H., Eickholz, P., et al.       | 2005 | Non-surgical periodontal therapy with adjunctive topical doxycycline: a double-masked, randomized, controlled multicenter study. II. Microbiological results                    | Journal of Periodontology                   | 76 | 1   | 66-74   | No PPD/CAL data                                   |
| 93 | Raut, C. P., Sethi, K. S., Kohale, B. R., Mamajiwala, A., and Warang, A.                                           | 2018 | Indocyanine green-mediated photothermal therapy in treatment of chronic periodontitis: A clinico-microbiological study                                                          | Journal of Indian Society of Periodontology | 22 | 3   | 221-227 | Adjunct not commercially available                |
| 94 | Renvert, S., Dahlén, G., and Snyder, B.                                                                            | 1997 | Clinical and microbiological effects of subgingival antimicrobial irrigation with citric acid as evaluated by an enzyme immunoassay and culture analysis                        | Journal of Periodontology                   | 68 | 4   | 346-352 | No randomization                                  |
| 95 | Renvert, S., Dahlen, G., and Wikström, M.                                                                          | 1996 | Treatment of periodontal disease based on microbiological diagnosis. Relation between microbiological and clinical parameters during 5 years                                    | Journal of Periodontology                   | 67 | 6   | 562-571 | Use of systemic antimicrobials                    |
| 96 | Ribeiro, É. D. P., Bittencourt, S., Sallum, E. A., Sallum, A. W., and Nociti Júnior, F. H.                         | 2010 | Non-surgical instrumentation associated with povidone-iodine in the treatment of interproximal furcation involvements                                                           | Journal of Applied Oral Science             | 18 | 6   | 599-606 | Failing sites retreated per initial basic therapy |
| 97 | Rodrigues, I. F. G., Machion, L., Casati, M. Z., Nociti Jr, F. H., de Toledo, S., Sallum, A. W., and Sallum, E. A. | 2007 | Clinical evaluation of the use of locally delivered chlorhexidine in periodontal maintenance therapy                                                                            | Journal of Periodontology                   | 78 | 4   | 624-628 | Adjunct administered 3 months after SRP           |
| 98 | Romano, F., Torta, I., Debernardi, C., and Aimetti, M.                                                             | 2005 | Debridement and local application of tetracycline in the management of persistent                                                                                               | Minerva Stomatologica                       | 54 | 1-2 | 43-51   | Discontinued adjunct                              |

|     |                                                                                                                               | periodontitis. Clinical and microbiological results after 12 months |                                                                                                                                                                                                                                               |                                                        |    |    |           |                                                   |  |
|-----|-------------------------------------------------------------------------------------------------------------------------------|---------------------------------------------------------------------|-----------------------------------------------------------------------------------------------------------------------------------------------------------------------------------------------------------------------------------------------|--------------------------------------------------------|----|----|-----------|---------------------------------------------------|--|
| 99  | Rosling, B. G., Slots, J., Christersson, L. A., Gröndahl, H. G., and Genco, R. J.                                             | 1986                                                                | Topical antimicrobial therapy and diagnosis of subgingival bacteria in the management of inflammatory periodontal disease                                                                                                                     | Journal of Clinical Periodontology                     | 13 | 10 | 975-981   | Trial series                                      |  |
| 100 | Rosling, B., Hellström, M. K., Ramberg, P., Socransky, S. S., and Lindhe, J.                                                  | 2001                                                                | The use of PVP-iodine as an adjunct to non-surgical treatment of chronic periodontitis                                                                                                                                                        | Journal of Clinical Periodontology                     | 28 | 11 | 1023-1031 | Failing sites retreated per initial basic therapy |  |
| 101 | Rudhart, A., Purucker, P., Kage, A., Hopfenmüller, W., and Bernimoulin, J. P.                                                 | 1998                                                                | Local metronidazole application in maintenance patients. Clinical and microbiological evaluation                                                                                                                                              | Journal of Periodontology                              | 69 | 10 | 1148-1154 | Not used as adjunct                               |  |
| 102 | Sakellari, D., Vouros, I., and Konstantinidis, A.                                                                             | 2003                                                                | The use of tetracycline fibers in the treatment of generalized aggressive periodontitis: clinical and microbiological findings                                                                                                                | Journal of The International Academy of Periodontology | 5  | 2  | 52-60     | Discontinued adjunct                              |  |
| 103 | Santuchi, C. C., Cortelli, J. R., Cortelli, S. C., Cota, L. O. M., Fonseca, D. C., Alencar, C. O., and Costa, F. O.           | 2016                                                                | Scaling and root planing per quadrant versus one-stage full-mouth disinfection: Assessment of the impact of chronic periodontitis treatment on quality of life—A clinical randomized, controlled trial                                        | Journal of Periodontology                              | 87 | 2  | 114-123   | Comparison of different SRP                       |  |
| 104 | Santuchi, C. C., Cortelli, S. C., Cortelli, J. R., Cota, L. O. M., Alencar, C. O., and Costa, F. O.                           | 2015                                                                | Pre- and post-treatment experiences of fear, anxiety, and pain among chronic periodontitis patients treated by scaling and root planing per quadrant versus one-stage full-mouth disinfection: A 6-month randomized controlled clinical trial | Journal of Clinical Periodontology                     | 42 | 11 | 1024-1031 | Comparison of different SRP                       |  |
| 105 | Sculean, A., Windisch, P., Keglevich, T., and Gera, I.                                                                        | 2003                                                                | Histologic evaluation of human intrabony defects following non-surgical periodontal therapy with and without application of an enamel matrix protein derivative                                                                               | Journal of Periodontology                              | 74 | 2  | 153-160   | Not RCT                                           |  |
| 106 | Segarra-Vidal, M., Guerra-Ojeda, S., Vallés, L.S., López-Roldán, A., Mauricio, M.D., Aldasoro, M., Alpiste-Illueca, F. et al. | 2017                                                                | Effects of photodynamic therapy in periodontal treatment: A randomized, controlled clinical trial                                                                                                                                             | Journal of Clinical Periodontology                     | 44 | 9  | 915-925   | Adjunct administered one week after SRP           |  |



|     |                                                                                                              |      |                                                                                                                                                                                         |                                                                                                                                  |    |    |           |                                                               |
|-----|--------------------------------------------------------------------------------------------------------------|------|-----------------------------------------------------------------------------------------------------------------------------------------------------------------------------------------|----------------------------------------------------------------------------------------------------------------------------------|----|----|-----------|---------------------------------------------------------------|
| 107 | Shaddox, L. M., Andia, D. C., Casati, M. Z., Nociti, F. H., Sallum, E. A., Gollwitzer, J., and Walker, C. B. | 2007 | Microbiologic changes following administration of locally delivered doxycycline in smokers: A 15-month follow-up                                                                        | Journal of Periodontology                                                                                                        | 78 | 11 | 2143-2149 | Subset of Machion 2004, 2006                                  |
| 108 | Shalev, A.                                                                                                   | 2019 | Clinical efficacy of local delivery minocycline gel for the treatment of moderate to severe periodontitis                                                                               | University of Minnesota Digital Conservancy, <a href="http://hdl.handle.net/11299/206137">http://hdl.handle.net/11299/206137</a> |    |    |           | Repeated application                                          |
| 109 | Shiloah, J., and Patters, M. R.                                                                              | 1996 | Repopulation of periodontal pockets by microbial pathogens in the absence of supportive therapy                                                                                         | Journal of Periodontology                                                                                                        | 67 | 2  | 130-139   | CAL data not separated by groups                              |
| 110 | Singh, M., Shreehari, A. K., Garg, P. K., and Singh, S.                                                      | 2014 | Clinical efficacy of chlorhexidine chips and tetracycline fibers as an adjunct to nonsurgical periodontal therapy                                                                       | European Journal of General Dentistry                                                                                            | 3  | 2  | 134-139   | Adjunct administered one week after SRP                       |
| 111 | Soeroso, Y., Akase, T., Sunarto, H., Kemal, Y., Salim, R., Octavia, M., Viandita, A., et al.                 | 2017 | The risk reduction of recurrent periodontal pathogens of local application minocycline HCl 2% gel, used as an adjunct to scaling and root planing for chronic periodontitis treatment   | Therapeutics and Clinical Risk Management                                                                                        | 13 |    | 307-314   | Duplicate of Soeroso 2016 which is more complete              |
| 112 | Soskolne, W. A., Heasman, P. A., Stabholz, A., Smart, G. J., Palmer, M., Flashner, M., and Newman, H. N.     | 1997 | Sustained local delivery of chlorhexidine in the treatment of periodontitis: A multi-center study                                                                                       | Journal of Periodontology                                                                                                        | 68 | 1  | 32-38     | Failing sites of control not retreated, bias toward adjunct?  |
| 113 | Soskolne, W. A., Proskin, H. M., and Stabholz, A.                                                            | 2003 | Probing depth changes following 2 years of periodontal maintenance therapy including adjunctive controlled release of chlorhexidine                                                     | Journal of Periodontology                                                                                                        | 74 | 4  | 420-427   | No randomization                                              |
| 114 | Stelzel, M.                                                                                                  | 1997 | Topical metronidazole application in recall patients: Long-term results                                                                                                                 | Journal of Clinical Periodontology                                                                                               | 24 | 12 | 914-919   | Not used as adjunct                                           |
| 115 | Sweatha, C., Srikanth, C., and Babu, M. R.                                                                   | 2015 | A comparative study of the effect of minocycline microspheres as an adjunct to scaling and root planing versus scaling and root planing alone in the treatment of chronic periodontitis | International Journal of Recent Scientific Research                                                                              | 6  | 4  | 3540-3550 | Failing sites of control not retreated, bias towards adjunct? |

|     |                                                                                                                                       |      |                                                                                                                                                                                                                                  |                                                      |    |   |               |                                                            |
|-----|---------------------------------------------------------------------------------------------------------------------------------------|------|----------------------------------------------------------------------------------------------------------------------------------------------------------------------------------------------------------------------------------|------------------------------------------------------|----|---|---------------|------------------------------------------------------------|
| 116 | Swierkot, K.,<br>Nonnenmacher, C. I.,<br>Mutters, R., Flores-de-<br>Jacoby, L., and Mengel, R.                                        | 2009 | One-stage full-mouth disinfection versus<br>quadrant and full-mouth root planing                                                                                                                                                 | Journal of Clinical<br>Periodontology                | 36 | 3 | 240-<br>249   | Comparison of<br>different SRP                             |
| 117 | Tabenski, L., Moder, D.,<br>Cieplik, F., Schenke, F.,<br>Hiller, K.A., Buchalla, W.,<br>Schmalz, G. and Christgau,<br>M.              | 2017 | Antimicrobial photodynamic therapy vs. local<br>minocycline in addition to non-surgical<br>therapy of deep periodontal pockets: A<br>controlled randomized clinical trial                                                        | Clinical Oral<br>Investigations                      | 21 | 7 | 2253-<br>2264 | Repeated<br>application                                    |
| 118 | Timmerman, M. F., Van<br>der Weijden, G. A., Van<br>Steenbergen, T. J. M.,<br>Mantel, M. S., De Graaff, J.,<br>and Van der Velden, U. | 1996 | Evaluation of the long-term efficacy and safety<br>of locally-applied minocycline in adult<br>periodontitis patients                                                                                                             | Journal of Clinical<br>Periodontology                | 23 | 8 | 707-<br>716   | Subset of van<br>Steenberghe<br>1999                       |
| 119 | Trojahn, M. R. B., Silva, R.<br>C. D., and Joly, J. C.                                                                                | 2013 | Non-surgical periodontal therapy for the<br>treatment of chronic periodontitis                                                                                                                                                   | Rgo. Revista<br>Gaúcha De<br>Odontologia<br>(Online) | 61 | 4 | 529-<br>534   | Adjunct not<br>commercially<br>available                   |
| 120 | Tomasi, C., and<br>Wennström, J. L.                                                                                                   | 2011 | Locally delivered doxycycline as an adjunct to<br>mechanical debridement at retreatment of<br>periodontal pockets: outcome at furcation sites                                                                                    | Journal of<br>Periodontology                         | 82 | 2 | 210-<br>218   | Subset of<br>Tomasi 2008                                   |
| 121 | Tonetti, M. S., Cortellini, P.,<br>Carnevale, G., Cattabriga,<br>M., De Sanctis, M., and<br>Prato, G. P.                              | 1998 | A controlled multi-center study of adjunctive<br>use of tetracycline periodontal fibers in<br>mandibular class II furcations with persistent<br>bleeding                                                                         | Journal of Clinical<br>Periodontology                | 25 | 9 | 728-<br>736   | Discontinued<br>adjunct                                    |
| 122 | Tonetti, M.S., Lang, N.P.,<br>Cortellini, P., Suvan, J.E.,<br>Eickholz, P., Fourmoussis,<br>I., Topoll, H., et al.                    | 2012 | Effects of a single topical doxycycline<br>administration adjunctive to mechanical<br>debridement in patients with<br>persistent/recurrent periodontitis but<br>acceptable oral hygiene during supportive<br>periodontal therapy | Journal of Clinical<br>Periodontology                | 39 | 5 | 475-<br>482   | Failing sites<br>retreated per<br>initial basic<br>therapy |
| 123 | Ueda, M., Teranishi, Y.,<br>Nakagaki, N., Imai, H.,<br>Katagiri, E. and Funaoka,<br>K.                                                | 1995 | Periodontal therapy by local delivery of<br>antibiotics—Periocline (R) administration in<br>periodontal pocket in combination with<br>scaling—(Part 4)                                                                           | Oral Therapeutics<br>and Pharmacology                | 14 | 2 | 99-<br>105    | Duration less<br>than 6 months                             |
| 124 | Ueda, M., Ogata, C., Suga,<br>H., Kohno, T., Imai, H.,<br>Cao, C., Geng, S., et al.                                                   | 2001 | Periodontal therapy with local delivery of<br>antibiotics: Part 1 Observation at Osaka Dental<br>University                                                                                                                      | Shikaigaku                                           | 64 | 2 | 187-<br>190   | Duration less<br>than 6 months                             |

|     |                                                                                                                                                                               |      |                                                                                                                                                     |                                                             |    |    |           |                             |
|-----|-------------------------------------------------------------------------------------------------------------------------------------------------------------------------------|------|-----------------------------------------------------------------------------------------------------------------------------------------------------|-------------------------------------------------------------|----|----|-----------|-----------------------------|
| 125 | Ueda, M., Ogata, C., Suga, H., Kohno, T., Imai, H., Cao, C., Geng, S., et al.                                                                                                 | 2001 | Periodontal therapy with local delivery of antibiotics: Part 2 Observation at Beijing University                                                    | Shikaigaku                                                  | 64 | 2  | 191-194   | Duration less than 6 months |
| 126 | Unsal, E., Akkaya, M., and Walsh, T. F.                                                                                                                                       | 1994 | Influence of a single application of subgingival chlorhexidine gel or tetracycline paste on the clinical parameters of adult periodontitis patients | Journal of Clinical Periodontology                          | 21 | 5  | 351-355   | Duration less than 6 months |
| 127 | Van Steenberghe, D., Rosling, B., Söder, P.Ö., Landry, R.G., Van der Velden, U., Timmerman, M.F.T., McCarthy, E.F., Vandenhoven, G., Wouters, C., Wilson, M. and Matthews, J. | 1999 | A 15-month evaluation of the effects of repeated subgingival minocycline in chronic adult periodontitis                                             | Journal of Periodontology                                   | 70 | 6  | 657-667   | Repeated application        |
| 128 | Vandekerckhove, B. N., Bollen, C. M., Dekeyser, C., Darius, P., and Quirynen, M.                                                                                              | 1996 | Full- versus partial-mouth disinfection in the treatment of periodontal infections. Long-term clinical observations of a pilot study                | Journal of Periodontology                                   | 67 | 12 | 1251-1259 | Comparison of different SRP |
| 129 | Vandekerckhove, B. N., Quirynen, M., and van Steenberghe, D.                                                                                                                  | 1997 | The use of tetracycline-containing controlled-release fibers in the treatment of refractory periodontitis                                           | Journal of Periodontology                                   | 68 | 4  | 353-361   | Discontinued adjunct        |
| 130 | Vitt, A., Gustafsson, A., Ramberg, P., Slizen, V., Kazeko, L. A., and Buhlin, K.                                                                                              | 2019 | Polyhexamethylene guanidine phosphate irrigation as an adjunctive to scaling and root planing in the treatment of chronic periodontitis             | Acta Odontologica Scandinavica                              | 77 | 4  | 290-295   | No CAL data                 |
| 131 | Wennström, J. L., Heijl, L., Dahlén, G., and Gröndahl, K.                                                                                                                     | 1987 | Periodic subgingival antimicrobial irrigation of periodontal pockets (I). Clinical observations                                                     | Journal of Clinical Periodontology                          | 14 | 9  | 541-550   | Adjunct placed before SRP   |
| 132 | Wong, M. Y., Lu, C. L., Liu, C. M., and Hou, L. T.                                                                                                                            | 1999 | Microbiological response of localized sites with recurrent periodontitis in maintenance patients treated with tetracycline fibers                   | Journal of Periodontology                                   | 70 | 8  | 861-868   | Discontinued adjunct        |
| 133 | Wong, M. Y., Lu, C. L., Liu, C. M., Hou, L. T., and Chang, W. K.                                                                                                              | 1998 | Clinical response of localized recurrent periodontitis treated with scaling, root planing, and tetracycline fiber                                   | Journal of The Formosan Medical Association = Taiwan Yi Zhi | 97 | 7  | 490-497   | Discontinued adjunct        |

|     |                                                                       |      |                                                                                                                                                             |                   |    |   |         |                                          |
|-----|-----------------------------------------------------------------------|------|-------------------------------------------------------------------------------------------------------------------------------------------------------------|-------------------|----|---|---------|------------------------------------------|
| 134 | Zingale, J., Harpenau, L., Bruce, G., Chambers, D., and Lundergan, W. | 2012 | The effectiveness of scaling and root planing with adjunctive time-release minocycline using an open and closed approach for the treatment of periodontitis | General Dentistry | 60 | 4 | 300-305 | No CAL data, compared surgical procedure |
|-----|-----------------------------------------------------------------------|------|-------------------------------------------------------------------------------------------------------------------------------------------------------------|-------------------|----|---|---------|------------------------------------------|

**Table S2.** Study characteristics of included studies.

| Study citation             | Country | Trial design | Centre | Setting    | Funding    | Disease severity                         | Definition                                                       | Age<br>Mean $\pm$ SD<br>(range) |                           | Sex<br>Male/female |         | n<br>smokers<br>(%) |
|----------------------------|---------|--------------|--------|------------|------------|------------------------------------------|------------------------------------------------------------------|---------------------------------|---------------------------|--------------------|---------|---------------------|
|                            |         |              |        |            |            |                                          |                                                                  | Test                            | Control                   | Test               | Control |                     |
| <b>Chlorhexidine chip</b>  |         |              |        |            |            |                                          |                                                                  |                                 |                           |                    |         |                     |
| (Azmak et al. 2002)        | Turkey  | split-mouth  | single | university | NR         | moderate to severe chronic periodontitis | Nonadjacent interproximal anterior sites with PPD 6-8 mm and BOP | NR (36-62)                      |                           | NR                 |         | NS                  |
| (Heasman et al. 2001)      | UK      | split-mouth  | single | university | NR         | moderate to severe chronic periodontitis | PPD $\geq$ 5 mm and BOP                                          | 42.6 $\pm$ 12.6 (34-59)         |                           | 8/18               |         | NS                  |
| (Paolantonio et al. 2008a) | Italy   | split-mouth  | 4      | university | NR         | moderate to advanced periodontitis       | Interproximal sites with PPD $\geq$ 5 mm and BOP                 | NR (33-65)                      |                           | 34/82              |         | NS                  |
| (Paolantonio et al. 2008b) | Italy   | split-mouth  | single | university | NR         | moderate to advanced periodontitis       | Interproximal sites with PPD $\geq$ 5 mm and BOP                 | NR (31-63)                      |                           | 33/49              |         | NS                  |
| (Reddy et al. 2016)        | India   | parallel     | single | university | NR         | chronic periodontitis                    | Nonadjacent sites with PPD $\geq$ 5 mm and BOP                   | NR                              |                           | NR                 |         | NS                  |
| (Sakellari et al. 2010)    | Greece  | parallel     | single | university | commercial | generalized chronic periodontitis        | Interproximal single-rooted sites with PPD 5-7 mm                | 46.35 $\pm$ 7.31 (36-64)        | 48.75 $\pm$ 10.15 (37-75) | 14/11              | 13/12   | 9/50 (18)           |

| Chlorhexidine varnish     |         |             |        |                                 |               |                                                |                                                                       |                     |                    |       |     |             |
|---------------------------|---------|-------------|--------|---------------------------------|---------------|------------------------------------------------|-----------------------------------------------------------------------|---------------------|--------------------|-------|-----|-------------|
| (Cosyn et al. 2007)       | Belgium | parallel    | 2      | university and private practice | NR            | chronic periodontitis                          | PPD ≥ 6 mm and BOP, radiographic bone loss (≥ 1/3 of the root length) | 49 ± 13 (30-75)     | 52 ± 12 (30-75)    | 9/8   | 7/9 | NS          |
| Chlorhexidine xanthan gel |         |             |        |                                 |               |                                                |                                                                       |                     |                    |       |     |             |
| (Jain et al. 2013)        | India   | split-mouth | single | university                      | NR            | chronic localized or generalized periodontitis | PPD 5-7 mm                                                            | NR (30-60)          |                    | 17/13 |     | NS          |
| (Kranti et al. 2010)      | India   | split-mouth | single | university                      | NR            | chronic periodontitis                          | PPD 5-8 mm                                                            | NR (25-65)          |                    | NR    |     | NS          |
| (Matesanz et al. 2013)    | Spain   | parallel    | single | university                      | commercial    | generalized chronic periodontitis              | PPD > 4 mm and BOP                                                    | 50.0 ± 8.3 (36-59)  | 50.2 ± 9.6 (36-71) | 5/5   | 3/9 | 5/22 (22.7) |
| (Paolantonio et al. 2009) | Italy   | split-mouth | 4      | university                      | NR            | moderate to advanced periodontitis             | Interproximal sites with PPD ≥ 5 mm and BOP                           | NR (24-58)          |                    | 39/59 |     | NS          |
| Doxycycline hyclate gel   |         |             |        |                                 |               |                                                |                                                                       |                     |                    |       |     |             |
| (Ağan et al. 2006A)       | Turkey  | split-mouth | single | university                      | NR            | chronic periodontitis                          | Nonadjacent single-rooted sites with                                  | 55 (41-49)          |                    | 6/4   |     | NR          |
| (Ağan et al. 2006B)       |         |             |        |                                 |               |                                                | PPD ≥ 6 mm, CAL ≥ 3 mm and BOP                                        | 25 (19-31)          |                    | 4/4   |     |             |
| (Deo et al. 2011)         | India   | parallel    | single | university                      | NR            | generalized chronic periodontitis              | PPD 5-7 mm                                                            | 36.8 ± 4.87 (30-45) |                    | 25/35 |     | NS          |
| (Machion et al. 2004)     | Brazil  | parallel    | single | university                      | research fund | chronic periodontitis                          | Anterior sites with PPD ≥ 5 mm and BOP                                | 40.45 ± 4.47 (NR)   | 42.00 ± 4.38 (NR)  | 19/24 |     | 43/43 (100) |

|                                     |           |             |        |            |               |                                            |                                                         |                      |                      |       |      |              |
|-------------------------------------|-----------|-------------|--------|------------|---------------|--------------------------------------------|---------------------------------------------------------|----------------------|----------------------|-------|------|--------------|
| (Tomasi et al. 2008)                | Sweden    | parallel    | single | university | research fund | moderate to advanced periodontitis         | PPD ≥ 5 mm and BOP                                      | 52 (37-67)           | 54 (32-70)           | 9/10  | 6/7  | 15/32 (46.9) |
| <b>Metronidazole gel</b>            |           |             |        |            |               |                                            |                                                         |                      |                      |       |      |              |
| (Buduneli et al. 2001)              | Turkey    | split-mouth | single | university | commercial    | chronic periodontitis                      | Nonadjacent sites with PPD ≥ 5 mm and CAL ≥ 4 mm        | 41.1 ± 4.9 (35-50)   |                      | 8/10  |      | NR           |
| (Griffiths et al. 2000)             | UK        | split-mouth | 2      | university | commercial    | moderate to advanced chronic periodontitis | PPD ≥ 5 mm                                              | 46 (34-63)           |                      | 18/27 |      | 15/45 (33.3) |
|                                     |           |             |        |            |               |                                            |                                                         | 47 (34-71)           |                      | 24/19 |      | 19/43 (44.2) |
| (Leiknes et al. 2007)               | Norway    | split-mouth | single | university | research fund | chronic periodontitis                      | Proximal sites with PPD ≥ 5 mm and BOP                  | 50.3 (NR)            |                      | 10/11 |      | NR           |
| (Stelzel and Flores-de-Jacoby 2000) | Germany   | split-mouth | single | university | commercial    | chronic periodontitis                      | PPD ≥ 5 mm                                              | 47 (23-70)           |                      | 35/24 |      | 25/59 (42.4) |
| <b>Minocycline gel/ointment</b>     |           |             |        |            |               |                                            |                                                         |                      |                      |       |      |              |
| (Jain et al. 2012)                  | India     | split-mouth | single | university | NR            | moderate to severe chronic periodontitis   | PPD > 5 mm and CAL ≥ 4 mm                               | NR                   |                      | NR    |      | NS           |
| (Soeroso et al. 2016)               | Indonesia | parallel    | single | university | commercial    | localized chronic periodontitis            | Interproximal sites with PPD 4-6 mm, CAL ≥ 4 mm and BOP | 43.67 ± 6.88 (30-55) | 44.00 ± 6.93 (30-55) | 7/33  | 9/31 | NS           |
| (Zhao et al. 2006)                  | China     | parallel    | single | university | NR            | moderate to advanced periodontitis         | PPD ≥ 5 mm and BOP                                      | 49.46 (38-71)        |                      | 64/0  |      | 64/64 (100)  |
| <b>Minocycline microspheres</b>     |           |             |        |            |               |                                            |                                                         |                      |                      |       |      |              |

|                            |             |             |        |            |            |                                            |                                                |                         |                                                                       |                                             |                |
|----------------------------|-------------|-------------|--------|------------|------------|--------------------------------------------|------------------------------------------------|-------------------------|-----------------------------------------------------------------------|---------------------------------------------|----------------|
| (Aboelsaad et al. 2014)    | Lebanon     | split-mouth | single | university | NR         | moderate to severe chronic periodontitis   | CAL $\geq$ 4 mm and PPD $\geq$ 5 mm            | 37 (31-49)              | 5/15                                                                  | 20/20 (100)                                 |                |
| (Henderson et al. 2002)    | New Zealand | split-mouth | single | university | commercial | moderate to severe chronic periodontitis   | Interproximal sites with PPD 6-9 mm            | 46.3 (35-69)            | 7/8                                                                   | 6/15 (40)                                   |                |
| (Van Dyke et al. 2002)     | USA         | parallel    | single | university | NR         | moderate to severe periodontitis           | PPD $\geq$ 6 mm                                | NR                      | NR                                                                    | NR                                          |                |
| *(103A 2000)               | USA         | parallel    | 8      | NR         | commercial | moderate to advanced chronic periodontitis | PPD 6-9 mm and BOP                             | 48.6 $\pm$ 10.1 (29-76) | SRP alone: 48 $\pm$ 10 (31-76)<br>Vehicle: 47.7 $\pm$ 9.7 (29-77)     | 69/52<br>SRP alone: 67/57<br>Vehicle: 67/56 | 151/368 (42.2) |
| *(103B 2000)               | USA         | parallel    | 8      | NR         | commercial | moderate to advanced chronic periodontitis | PPD 6-9 mm and BOP                             | 49.6 $\pm$ 10.2 (29-75) | SRP alone: 47.7 $\pm$ 9.5 (29-72)<br>Vehicle: 46.7 $\pm$ 10.3 (29-79) | 65/63<br>SRP alone: 65/61<br>Vehicle: 77/49 | 120/380 (31.6) |
| <b>Tetracycline fibers</b> |             |             |        |            |            |                                            |                                                |                         |                                                                       |                                             |                |
| (Reddy et al. 2016)        | India       | parallel    | single | university | NR         | chronic periodontitis                      | Nonadjacent sites with PPD $\geq$ 5 mm and BOP | NR                      | NR                                                                    | NS                                          |                |
| <b>Hyaluronic acid gel</b> |             |             |        |            |            |                                            |                                                |                         |                                                                       |                                             |                |

|                                                  |               |             |        |                  |               |                                          |                                                                |                      |                      |       |       |              |
|--------------------------------------------------|---------------|-------------|--------|------------------|---------------|------------------------------------------|----------------------------------------------------------------|----------------------|----------------------|-------|-------|--------------|
| (Eick et al. 2013)                               | Germany       | parallel    | single | university       | commercial    | moderate or severe chronic periodontitis | PPD ≥ 5 mm                                                     | 54.82 ± 9.35 (42-70) | 54.06 ± 9.81 (41-72) | 8/9   | 6/11  | NS           |
| <b>Sulfonic/sulfuric acid gel</b>                |               |             |        |                  |               |                                          |                                                                |                      |                      |       |       |              |
| (Isola et al. 2018)                              | Italy         | split-mouth | single | university       | research fund | generalized chronic periodontitis        | PPD ≥ 5 mm and BOP, no furcations                              | 46.7 (27-65)         |                      | 19/17 |       | NS           |
| <b>Antimicrobial photodynamic therapy (aPDT)</b> |               |             |        |                  |               |                                          |                                                                |                      |                      |       |       |              |
| <b>Indocyanine green (ICG)</b>                   |               |             |        |                  |               |                                          |                                                                |                      |                      |       |       |              |
| (Gandhi et al. 2019)                             | USA and India | split-mouth | single | university       | NR            | moderate to severe chronic periodontitis | PPD ≥ 5 mm                                                     | NR (30-60)           |                      | NR    |       | NS           |
| (G. Hill et al. 2019)                            | Germany       | split-mouth | single | university       | commercial    | chronic periodontitis                    | one single and one multi-rooted tooth, PPD ≥ 4 mm per quadrant | 61.1 (NR)            |                      | 3/17  |       | NS           |
| <b>Methylene blue (MB) 0.005%</b>                |               |             |        |                  |               |                                          |                                                                |                      |                      |       |       |              |
| (Berakdar et al. 2012)                           | Germany       | split-mouth | single | university       | NR            | chronic periodontitis                    | Minimum 4 teeth with PPD ≥ 5 mm and BOP                        | 59.3 ± 11.7 (38-74)  |                      | 12/10 |       | NS           |
| (Müller Campanile et al. 2015)                   | Switzerland   | split-mouth | single | private practice | commercial    | chronic periodontitis                    | PPD > 4 mm, CAL > 1 mm and BOP                                 | 62.8 (37-77)         |                      | 14/13 |       | 12/27 (44.4) |
| <b>Methylene blue (MB) 1%</b>                    |               |             |        |                  |               |                                          |                                                                |                      |                      |       |       |              |
| (Betsy et al. 2014)                              | India         | parallel    | single | university       | research fund | chronic periodontitis                    | Single rooted sites with PPD 4-6 mm                            | 40.8 ± 8.3 (NR)      | 38.4 ± 9.6 (NR)      | 22/22 | 15/29 | NS           |
| (Dilsiz et al. 2013)                             | Turkey        | split-mouth | single | university       | research fund | chronic periodontitis                    | Nonadjacent sites, PPD ≥ 5 mm, BOP and                         | 40.7 ± 7.3 (30-58)   |                      | 10/14 |       | NS           |



|                                          |                 |             |        |            |               |                                          |                                                                                     |                                                          |                    |       |      |             |
|------------------------------------------|-----------------|-------------|--------|------------|---------------|------------------------------------------|-------------------------------------------------------------------------------------|----------------------------------------------------------|--------------------|-------|------|-------------|
|                                          |                 |             |        |            |               |                                          | radiographic bone loss                                                              |                                                          |                    |       |      |             |
| (Luchesi et al. 2013)                    | Brazil          | parallel    | single | university | research fund | chronic periodontitis                    | one buccal or lingual class II furcation (Hamp et al. 1975) with PPD ≥ 5 mm and BOP | 50.75 ± 8.18 (NR)                                        | 50.24 ± 10.89 (NR) | 7/14  | 6/15 | NS          |
| (Malgikar et al. 2016)                   | India           | split-mouth | single | university | NR            | chronic periodontitis                    | PPD ≥ 5 mm, radiographic bone loss                                                  | NR (24-55)<br>Male: 36.73 ± 8.46<br>Female: 34.33 ± 6.80 |                    | 15/9  |      | NS          |
| <b>Phenothiazine chloride (PC)</b>       |                 |             |        |            |               |                                          |                                                                                     |                                                          |                    |       |      |             |
| (Alwaeli et al. 2015)                    | Jordan          | split-mouth | single | university | NR            | chronic periodontitis                    | Minimum 4 posterior teeth with CAL ≥ 4 mm                                           | 40.96 ± 13.34 (NR)                                       |                    | 5/11  |      | NR          |
| (Chondros et al. 2009)                   | The Netherlands | parallel    | single | university | commercial    | chronic periodontitis                    | PPD ≥ 4 mm and BOP                                                                  | 50.6 ± 9.2 (NR)                                          | 48.3 ± 7.9 (NR)    | 5/7   | 5/7  | 7/24 (29.2) |
| (Christodoulidis et al. 2008)            | The Netherlands | parallel    | single | university | commercial    | chronic periodontitis                    | NR                                                                                  | 43.7 ± 7.3 (NR)                                          | 47.3 ± 8.8 (NR)    | 5/7   | 6/6  | 3/24 (12.5) |
| <b>Toluidine blue O (TBO)</b>            |                 |             |        |            |               |                                          |                                                                                     |                                                          |                    |       |      |             |
| (Theodoro et al. 2012)                   | Brazil          | split-mouth | single | university | research fund | chronic periodontitis                    | Nonadjacent sites with PPD 5-9 mm and BOP                                           | 43.12 ± 8.2 (NR)                                         |                    | 12/21 |      | NS          |
| <b>Subgingival antiseptic irrigation</b> |                 |             |        |            |               |                                          |                                                                                     |                                                          |                    |       |      |             |
| (Denez et al. 2016)                      | Belgium         | split-mouth | single | university | research fund | moderate to severe chronic periodontitis | PPD ≥ 4 mm and BOP, radiographic bone loss                                          | 45 ± 9.7 (28-60)                                         |                    | 10/18 |      | NS          |

|                       |                         |          |        |            |               |                                            |                    |                       |                       |      |      |    |
|-----------------------|-------------------------|----------|--------|------------|---------------|--------------------------------------------|--------------------|-----------------------|-----------------------|------|------|----|
| (do Vale et al. 2016) | Brazil                  | parallel | single | university | research fund | generalized aggressive periodontitis       | PPD ≥ 5 mm and BOP | 28.54 ±4.14 (NR)      | 28.57 ±4.59 (NR)      | 9/5  | 12/2 | NS |
| (Krück et al. 2012)   | Germany and Switzerland | parallel | single | university | research fund | generalized moderate chronic periodontitis | PPD 4-6 mm         | 51.82 ± 10.61 (35-68) | 51.00 ± 12.65 (34-75) | 5/12 | 9/8  | NR |
|                       |                         |          |        |            |               |                                            |                    | 50.13 ± 9.74 (34-71)  |                       | 8/9  |      |    |

NR—not reported; NS—nonsmokers; \*103A and 103B are two separate studies with individual data reported under one document (FDA Center for Drug Application Reviews 2000).

**Table S3.** Clinical outcome assessment of included studies.

| Study citation             | Blinding | Examiners | Calibration | Probing type                          | Use of stent | Gingival bleeding indices                    | Plaque indices        |
|----------------------------|----------|-----------|-------------|---------------------------------------|--------------|----------------------------------------------|-----------------------|
| (Azmaq et al. 2002)        | single   | 1         | NR          | Manual                                | NR           | Saxer and Muhlemann 1975                     | Silness and Loe 1964  |
| (Heasman et al. 2001)      | single   | 2         | Yes         | Manual (PPD), Computer assisted (CAL) | NR           | Muhlemann 1977                               | Silness and Loe 1964  |
| (Paolantonio et al. 2008a) | single   | 4         | Yes         | Manual                                | yes          | Lobene 1986                                  | Loe 1967              |
| (Paolantonio et al. 2008b) | single   | 1         | NR          | Manual                                | NR           | NR                                           | NR                    |
| (Reddy et al. 2016)        | NR       | 1         | NR          | Manual                                | NR           | NR                                           | NR                    |
| (Sakellari et al. 2010)    | single   | 1         | Yes         | Manual                                | NR           | NR                                           | NR                    |
| (Cosyn et al. 2007)        | single   | 1         | yes         | Manual                                | NR           | Muhlemann and Son 1971                       | Quigley and Hein 1962 |
| (M. Jain et al. 2013)      | single   | 1         | NR          | Manual                                | yes          | Muhlemann and Son 1971, Loe and Silness 1963 | Silness and Loe 1964  |
| (Kranti et al. 2010)       | triple   | 1         | NR          | Manual                                | yes          | Loe 1967                                     | Loe 1967              |
| (Matesanz et al. 2013)     | triple   | 2         | Yes         | Computer assisted                     | NR           | Loe 1967                                     | Loe 1967              |
| (Paolantonio et al. 2009)  | single   | 3         | Yes         | Manual                                | yes          | Loe 1967                                     | Lobene 1986           |
| (Ağan et al. 2006)         | single   | 1         | NR          | NR                                    | NR           | Saxer and Muhleman 1975                      | Quigley and Hein 1962 |
| (Deo et al. 2011)          | single   | 1         | NR          | Manual                                | NR           | Muhlemann and Son 1971                       | Quigley and Hein 1962 |

|                                     |        |    |     |                   |     |                         |                       |
|-------------------------------------|--------|----|-----|-------------------|-----|-------------------------|-----------------------|
| (Machion et al. 2004)               | single | 1  | Yes | Computer assisted | Yes | NR                      | NR                    |
| (Tomasi et al. 2008)                | single | 2  | Yes | Manual            | NR  | NR                      | NR                    |
| (Buduneli et al. 2001)              | single | 1  | NR  | Manual            | NR  | Saxer and Muhleman 1975 | Ainamo and Bay 1975   |
| (Griffiths et al. 2000)             | single | 2  | Yes | Manual            | Yes | Muhleman 1977           | NR                    |
| (Leiknes et al. 2007)               | single | 1  | NR  | Computer assisted | NR  | NR                      | NR                    |
| (Stelzel and Florès-de-Jacoby 2000) | single | NR | NR  | Manual            | NR  | NR                      | NR                    |
| (Jain et al. 2012)                  | NR     | NR | NR  | NR                | Yes | Silness and Loe 1964    | Ainamo and Bay 1975   |
| (Soeroso et al. 2016)               | single | NR | NR  | Manual            | NR  | Muhlemann and Son 1971  | Loe and Silness 1967  |
| (Zhao et al. 2006)                  | single | 1  | NR  | NR                | NR  | NR                      | NR                    |
| (Aboelsaad et al. 2014)             | single | 1  | Yes | Manual            | NR  | NR                      | Silness and Loe 1964  |
| (Henderson et al. 2002)             | single | 1  | NR  | Manual            | NR  | Muhlemann 1977          | Silness and Loe 1964  |
| (Van Dyke et al. 2002)              | double | 1  | NR  | Computer assisted | NR  | Loe and Silness 1963    | Silness and Loe 1964  |
| (103A 2000)*                        | single | 8  | Yes | Manual            | NR  | NR                      | NR                    |
| (103B 2000)*                        | single | 8  | Yes | Manual            | NR  | NR                      | NR                    |
| (Eick et al. 2013)                  | Non    | 1  | NR  | Manual            | NR  | NR                      | Lange 1977            |
| (Isola et al. 2018)                 | single | 1  | yes | Manual            | NR  | Muhlemann and Son 1971  | Quigley and Hein 1962 |
| (Gandhi et al. 2019)                | double | 1  | NR  | Manual            | NR  | Loe 1967                | Loe 1967              |
| (G. Hill et al. 2019)               | single | 1  | NR  | Force controlled  | NR  | NR                      | NR                    |
| (Berakdar et al. 2012)              | single | 1  | NR  | Manual            | NR  | Loe and Silness 1963    | Silness and Loe 1964  |
| (Müller Campanile et al. 2015)      | single | 1  | NR  | NR                | NR  | Loe and Silness 1963    | Silness and Loe 1964  |
| (Betsy et al. 2014)                 | single | 2  | Yes | Manual            | NR  | Ainamo and Bay 1975     | Silness and Loe 1964  |
| (Dilsiz et al. 2013)                | double | 1  | Yes | Computer assisted | Yes | Loe 1967                | Loe 1967              |
| (Luchesi et al. 2013)               | double | 1  | Yes | Manual            | Yes | Muhlemann and Son 1971  | Ainamo and Bay 1975   |
| (Malgikar et al. 2016)              | triple | 1  | Yes | Manual            | Yes | Loe and Silness 1963    | Silness and Loe 1964  |

|                               |        |   |     |                  |     |                        |                      |
|-------------------------------|--------|---|-----|------------------|-----|------------------------|----------------------|
| (Alwaeli et al. 2015)         | single | 2 | Yes | Force controlled | yes | NR                     | NR                   |
| (Chondros et al. 2009)        | Single | 1 | Yes | Manual           | NR  | NR                     | O'Leary 1972         |
| (Christodoulides et al. 2008) | single | 1 | Yes | Manual           | NR  | NR                     | O'Leary 1972         |
| (Theodoro et al. 2012)        | single | 1 | Yes | Manual           | Yes | NR                     | NR                   |
| (Denez et al. 2016)           | single | 1 | yes | Manual           | Yes | Loe 1967               | Silness and Loe 1964 |
| (do Vale et al. 2016)         | single | 1 | yes | Manual           | Yes | Muhlemann and Son 1971 | Ainamo and Bay 1975  |
| (Krück et al. 2012)           | Non    | 3 | yes | Manual           | NR  | NR                     | NR                   |

NR— not reported; \*additional data from Williams et al. (2001).

**Table S4.** Intervention characteristics of included studies.

| Study citation               | Status of periodontitis | Perio-dontal therapy pre-intervention | Perio-dontal therapy post-intervention | Area of intervention FM/PM | Test group         |                          |          |                  | Control group |                                        |                         |
|------------------------------|-------------------------|---------------------------------------|----------------------------------------|----------------------------|--------------------|--------------------------|----------|------------------|---------------|----------------------------------------|-------------------------|
|                              |                         |                                       |                                        |                            | Intervention       | Frequency of application | Dressing | Application time | Intervention  | Operator                               | Debride-ment time       |
| <b>Chlorhexidine chip</b>    |                         |                                       |                                        |                            |                    |                          |          |                  |               |                                        |                         |
| (Azmak et al. 2002)          | Untreated               | > 6 m prior to BL                     | FMSP and OHI                           | PM – 1 site                | Periochip® + SRP   | single                   | NR       | NR               | SRP           | NR                                     | 5 min/tooth             |
| (Heasman et al. 2001)        | Recurrent               | SPT > 3 m                             | NR                                     | FM - PPD ≥ 5 mm and BOP    | Periochip® + SRP   | single                   | NR       | NR               | SRP           | Dental hygienist (SRP), Dentist (chip) | 5 min/tooth             |
| (Paolantonio et al. 2008a)   | Untreated               | > 6 m prior to BL                     | FMSP and OHI                           | PM – 1 site                | Periochip® + SRP   | single                   | NR       | NR               | SRP           | NR                                     | 5 min/site; 2 h/session |
| (Paolantonio et al. 2008b)   | Untreated               | > 6 m prior to BL                     | FMSP and OHI                           | PM – 1 site                | Periochip® + SRP   | single                   | NR       | NR               | SRP           | NR                                     | 5 min/site; 2 h/session |
| (Reddy et al. 2016)          | Untreated               | > 3 m prior to BL                     | FMSP and OHI                           | PM – 1 site                | PerioCol®-CG + SRP | single                   | NR       | NR               | SRP           | NR                                     | NR                      |
| (Sakellari et al. 2010)      | Untreated               | > 12 m prior to BL                    | OHI                                    | PM – 4 sites               | Periochip® + SRP   | single                   | NR       | NR               | SRP           | NR                                     | 5-10 min/tooth          |
| <b>Chlorhexidine varnish</b> |                         |                                       |                                        |                            |                    |                          |          |                  |               |                                        |                         |
| (Cosyn et al. 2007)          | Untreated               | NR                                    | NR                                     | FM                         | EC40® + SRP        | single                   | NR       | NR               | SRP           | NR                                     | 3 h/patient             |

| <b>Chlorhexidine xanthan gel</b>    |                      |                                   |              |               |                   |                          |               |    |               |                  |                         |
|-------------------------------------|----------------------|-----------------------------------|--------------|---------------|-------------------|--------------------------|---------------|----|---------------|------------------|-------------------------|
| (M. Jain et al. 2013)               | Untreated            | > 6 m prior to BL                 | NR           | PM-1 site     | Chlo-Site® + SRP  | single                   | Yes           | NR | SRP           | NR               | No time restriction     |
| (Kranti et al. 2010)                | Untreated            | > 6 m prior to BL                 | FMSP and OHI | FM-PPD 5-8 mm | Chlo-Site® + SRP  | single                   | NR            | NR | Placebo + SRP | NR               | NR                      |
| (Matesanz et al. 2013)              | Recurrent            | > 6 m prior to BL or SPT > 1 year | FMSP and OHI | PM-4-10 sites | Chlo-Site® + SRP  | single                   | Yes           | NR | Placebo + SRP | NR               | NR                      |
| (Paolantonio et al. 2009)           | Untreated            | > 6 m prior to BL                 | FMSP and OHI | PM-1 site     | Chlo-Site® + SRP  | single                   | NR            | NR | SRP           | NR               | 5 min/site, 2 h/session |
| <b>Doxycycline hyclate gel</b>      |                      |                                   |              |               |                   |                          |               |    |               |                  |                         |
| (Ağan et al. 2006)                  | Untreated            | > 6 m prior to BL                 | FMSP and OHI | PM-2 sites    | Atridox® + SRP    | single                   | Yes           | NR | SRP           | NR               | 10 min/tooth            |
| (Deo et al. 2011)                   | Untreated            | NR                                | OHI          | PM-1 site     | Atridox® + SRP    | single                   | NR            | NR | Placebo + SRP | NR               | NR                      |
| (Machion et al. 2004)               | Untreated            | > 6 m prior to BL                 | FMSP and OHI | FM-PPD ≥ 5 mm | Atridox® + SRP    | single                   | NR            | NR | SRP           | Experienced      | No time restriction     |
| (Tomasi et al. 2008)                | Untreated            | > 12 m prior to BL                | FMSP and OHI | FM-PPD ≥ 5 mm | Atridox® + U/S    | single                   | No            | NR | U/S           | Dental hygienist | No time restriction     |
| <b>Metronidazole gel</b>            |                      |                                   |              |               |                   |                          |               |    |               |                  |                         |
| (Buduneli et al. 2001)              | Untreated            | > 6 m prior to BL                 | OHI          | PM-2-3 sites  | Elyzol® + SRP     | 2x (BL, 1 w)             | NR            | NR | SRP           | NR               | 9-12 min/tooth          |
| (Griffiths et al. 2000)             | Untreated            | > 6 m prior to BL                 | FMSP and OHI | FM-PPD ≥ 5 mm | Elyzol® + SRP     | 2x (BL, 1 w)             | NR            | NR | SRP           | NR               | Max 60 min/arch         |
| (Leiknes et al. 2007)               | Recurrent            | SPT ≥ 2 y                         | OHI          | PM-1 site     | Elyzol® + SRP     | 2x (BL, 1 w)             | NR            | NR | SRP           | NR               | No time restriction     |
| (Stelzel and Florès-de-Jacoby 2000) | Untreated, recurrent | > 3 m prior to BL                 | NR           | FM-PPD ≥ 5 mm | Elyzol® + SRP     | 2x (BL, 1 w)             | NR            | NR | SRP           | NR               | NR                      |
| <b>Minocycline gel/ointment</b>     |                      |                                   |              |               |                   |                          |               |    |               |                  |                         |
| (Jain et al. 2012)                  | Untreated            | NR                                | FMSP         | PM-22 sites   | Dentomycin® + SRP | 3x (BL, 2 w, 4 w) #      | Cyanoacrylate | NR | SRP           | NR               | NR                      |
| (Soeroso et al. 2016)               | Untreated            | > 6 m prior to BL                 | NR           | FM            | Perioline® + SRP  | 4x (BL, 1 w, 2 w, 3 w) # | NR            | NR | SRP           | NR               | NR                      |
| (Zhao et al. 2006)                  | Untreated            | Never                             | FMSP + OHI   | FM-PPD ≥ 5 mm | Perioline® + SRP  | 4x (BL, 1 w, 2 w, 3 w) # | NR            | NR | SRP           | NR               | 10 min/tooth            |
| <b>Minocycline microspheres</b>     |                      |                                   |              |               |                   |                          |               |    |               |                  |                         |

|                                           |           |                    |              |                           |                                           |        |                          |       |                    |                          |                     |
|-------------------------------------------|-----------|--------------------|--------------|---------------------------|-------------------------------------------|--------|--------------------------|-------|--------------------|--------------------------|---------------------|
| (Aboelsaad et al. 2014)                   | Untreated | > 6 m prior to BL  | FMSP and OHI | FM-PPD ≥ 5 mm             | Arestin®+ SRP                             | single | NR                       | NR    | SRP                | NR                       | NR                  |
| (Henderson et al. 2002)                   | Untreated | > 6 m prior to BL  | NR           | PM-2 sites                | Arestin®+ SRP                             | single | No                       | NR    | SRP                | Dentist                  | 90 min/patient      |
| (Van Dyke et al. 2002)                    | Untreated | NR                 | NR           | PM-2 teeth                | Arestin®+ SRP                             | single | NR                       | NR    | SRP                | NR                       | NR                  |
| (103A, 103B 2000)*                        | Untreated | > 6 m prior to BL  | NR           | FM-PPD ≥ 5 mm             | Arestin®+ SRP                             | single | NR                       | NR    | SRP, Placebo + SRP | NR                       | No time restriction |
| <b>Tetracycline fibers</b>                |           |                    |              |                           |                                           |        |                          |       |                    |                          |                     |
| (Reddy et al. 2016)                       | Untreated | > 3 m prior to BL  | FMSP and OHI | PM-1 site                 | PerioCol®-TC + SRP                        | single | NR                       | NR    | SRP                | NR                       | NR                  |
| <b>Hyaluronic acid gel</b>                |           |                    |              |                           |                                           |        |                          |       |                    |                          |                     |
| (Eick et al. 2013)                        | Untreated | > 12 m prior to BL | FMSP + OHI   | FM                        | 0.8% Gengigel®+ SRP                       | single | NR                       | NR    | SRP                | Periodontist             | NR                  |
| <b>Sulfonic/sulfuric acid gel</b>         |           |                    |              |                           |                                           |        |                          |       |                    |                          |                     |
| (Isola et al. 2018)                       | Untreated | > 12 m prior to BL | FMSP + OHI   | PM-1 quadrant             | HybenX®+ SRP                              | single | NR                       | 60 s  | NaCL+ SRP          | Periodontist             | 9 min/quadrant      |
| <b>Antimicrobial photodynamic therapy</b> |           |                    |              |                           |                                           |        |                          |       |                    |                          |                     |
| (Gandhi et al. 2019)                      | Untreated | > 6 m prior to BL  | FMSP and OHI | FM-PPD ≥ 5 mm             | ICG + SRP                                 | single | Laser: 100 mW and 810 nm | 2 min | SRP                | Periodontist             | 5 min/tooth         |
| (G. Hill et al. 2019)                     | Untreated | > 6 m prior to BL  | FMSP and OHI | PM-2 quadrants PPD ≥ 4 mm | perio green®+ SRP                         | single | Laser: 100 mW and 808 nm | NR    | SRP                | NR                       | NR                  |
| (Berakdar et al. 2012)                    | Untreated | NR                 | FMSP         | PM-2 teeth                | Periowave <sup>T</sup> <sub>M</sub> + SRP | single | Laser: 75 mW and 670 nm  | 1 min | SRP                | NR                       | NR                  |
| (Müller Campanile et al. 2015)            | Recurrent | SRP > 3-12 m       | OHI          | PM-4 sites                | Periowave <sup>T</sup> <sub>M</sub> + U/S | single | Laser: 280 mW and 670 nm | 1 min | Sham + U/S         | NR                       | NR                  |
| (Betsy et al. 2014)                       | Untreated | NR                 | OHI          | FM-PPD 4-6 mm             | MB 1% + SRP                               | single | Laser: 1 W and           | 3 min | SRP                | Experienced periodontist | No time restriction |

|                                          |           |                    |              |                              |                  |        |                             |         |                    |                  |                     |
|------------------------------------------|-----------|--------------------|--------------|------------------------------|------------------|--------|-----------------------------|---------|--------------------|------------------|---------------------|
|                                          |           |                    |              |                              |                  |        | 655 nm                      |         |                    |                  |                     |
| (Dilsiz et al. 2013)                     | Untreated | > 6 m prior to BL  | FMSP and OHI | FM—PPD ≥ 5 mm                | MB 1% + SRP      | single | Laser:<br>100 mW and 808 nm | 3 min   | Sham + SRP         | NR               | No time restriction |
| (Luchesi et al. 2013)                    | Untreated | > 6 m prior to BL  | FMSP         | PM—1 site                    | MB 1% + SRP      | single | Laser:<br>60 mW and 660 nm  | 1 min   | Sham + SRP         | NR               | NR                  |
| (Malgikar et al. 2016)                   | Untreated | > 6 m prior to BL  | OHI          | PM—>1 site                   | MB 1% + SRP      | single | Laser:<br>1 W and 980 nm    | 3 min   | SRP                | NR               | NR                  |
| (Alwaeli et al. 2015)                    | Untreated | None               | FMSP and OHI | PM—2 quadrants<br>PPD ≥ 4 mm | HELBO® + SRP     | single | Laser:<br>100 mW and 660 nm | 1-3 min | SRP                | Dentist          | NR                  |
| (Chondros et al. 2009)                   | Recurrent | SRP > 6 m          | NR           | FM—PPD ≥ 4 mm                | HELBO® + SRP     | single | Laser:<br>75 mW and 670 nm  | 1 min   | SRP                | Dental therapist | No time restriction |
| (Christodoulides et al. 2008)            | Untreated | > 2 y prior to BL  | NR           | FM                           | HELBO® + SRP     | single | Laser:<br>75 mW and 670 nm  | 1 min   | SRP                | Experienced      | No time restriction |
| (Theodoro et al. 2012)                   | Untreated | > 12 m prior to BL | FMSP and OHI | PM—1 site                    | TBO 0.01% + SRP  | Single | Laser:<br>30 mW and 660 nm  | 1 min   | SRP,<br>Sham + SRP | NR               | NR                  |
| <b>Subgingival antiseptic irrigation</b> |           |                    |              |                              |                  |        |                             |         |                    |                  |                     |
| (Denez et al. 2016)                      | Untreated | > 3 m prior to BL  | OHI          | PM—4 sites                   | 10% PVP-I + SRP  | single | NR                          | 60 s    | 0.9% NaCl + SRP    | Periodontist     | 1.5 h/patient       |
| (do Vale et al. 2016)                    | Untreated | > 6 m prior to BL  | FMSP and OHI | FM                           | 10% PVP-I + U/S  | Single | NR                          | NR      | U/S                | NR               | 45 min/session      |
| (Krück et al. 2012)                      | Untreated | NR                 | NR           | FM                           | 0.12% CHX + SRP  | single | NR                          | NR      | 0.9% NaCl + SRP    | NR               | 5 min/tooth         |
|                                          |           |                    |              |                              | 7.5% PVP-I + SRP | single | NR                          |         |                    |                  |                     |

NR—not reported; FM—full mouth; PM—partial mouth; BL—baseline; SPT—supportive periodontal therapy; FMSP—full mouth supragingival prophylaxis;

\*additional data from Williams et al. (2001), #considered as single application per manufacturer's instruction.

Table S5. Outcomes data of included studies.

| Study citation                   | Follow-up duration (months) | Test group                  |                    |               |                    |                                                         | Control group               |                    |               |                    |                |                            |
|----------------------------------|-----------------------------|-----------------------------|--------------------|---------------|--------------------|---------------------------------------------------------|-----------------------------|--------------------|---------------|--------------------|----------------|----------------------------|
|                                  |                             | Sample size BL/end of study | Mean PPD reduction | Mean CAL gain | Mean BOP reduction | Adverse events                                          | Sample size BL/end of study | Mean PPD reduction | Mean CAL gain | Mean BOP reduction | Adverse events | Statistical notes          |
| <b>Chlorhexidine chip</b>        |                             |                             |                    |               |                    |                                                         |                             |                    |               |                    |                |                            |
| (Azmak et al. 2002)              | 6                           | 22/20                       | 2.40 ± 0.63        | 1.70 ± 0.56   | NR                 | NR                                                      | 22/20                       | 2.10 ± 0.63        | 1.60 ± 0.56   | NR                 | NR             | End data in graphs         |
| (Heasman et al. 2001)            | 6                           | 26/24                       | 0.78 ± 0.61        | 0.43 ± 0.76   | 1.08 ± 0.51        | 1 non-intervention related aphthae of the buccal mucosa | 26/24                       | 0.45 ± 0.66        | 0.15 ± 0.46   | 0.59 ± 0.51        | NR             | SE converted to SD, ITT    |
| (Paolantonio et al. 2008a)       | 6                           | 116/116                     | 1.50 ± 1.08        | 1.10 ± 1.08   | NR                 | NR                                                      | 116/116                     | 0.90 ± 1.08        | 0.50 ± 1.08   | NR                 | NR             | SE converted to SD         |
| (Paolantonio et al. 2008b)       | 6                           | 82/82                       | 1.50 ± 0.91        | 1.10 ± 0.91   | 86%                | NR                                                      | 82/82                       | 0.90 ± 0.91        | 0.50 ± 0.91   | 85%                | NR             | Assumed SE converted to SD |
| (Reddy et al. 2016)              | 12                          | 16/16                       | 3.56 ± 1.26        | 2.13 ± 1.14   | NR                 | NR                                                      | 16/16                       | 2.94 ± 1.01        | 0.88 ± 1.06   | NR                 | NR             | SE converted to SD         |
| (Sakellari et al. 2010)          | 6                           | 27/25                       | 1.79 ± 1.02        | 1.40 ± 1.19   | 0.25 ± 0.41        | None                                                    | 29/25                       | 2.05 ± 0.90        | 1.40 ± 1.48   | 0.33 ± 0.39        | None           | Mean difference NR         |
| <b>Chlorhexidine varnish</b>     |                             |                             |                    |               |                    |                                                         |                             |                    |               |                    |                |                            |
| (Cosyn et al. 2007)              | 6                           | 17/15                       | 1.13 ± 0.71        | 0.36 ± 1.14   | 0.56 ± 0.42        | NR                                                      | 16/14                       | 0.96 ± 0.53        | 0.39 ± 0.95   | 0.48 ± 0.52        | NR             |                            |
| <b>Chlorhexidine xanthan gel</b> |                             |                             |                    |               |                    |                                                         |                             |                    |               |                    |                |                            |
| (M. Jain et al. 2013)            | 6                           | 30/30                       | 2.80 ± 0.73        | 1.67 ± 3.55   | 1.56 ± 0.78        | NR                                                      | 30/30                       | 2.20 ± 0.92        | 2.23 ± 2.67   | 1.44 ± 0.96        | NR             | Mean difference NR         |
| (Kranti et al. 2010)             | 6                           | 10/10                       | 3.11 ± 0.47        | 3.11 ± 0.65   | 0.93 ± 0.21        | NR                                                      | 10/10                       | 2.44 ± 0.55        | 2.44 ± 0.98   | 0.62 ± 0.25        | NR             |                            |
| (Matesanz et al. 2013)           | 6                           | 10/10                       | 0.34 ± 0.41        | 0.23 ± 0.70   | 0.14 ± 0.19        | None                                                    | 12/11                       | 0.20 ± 0.40        | 0.04 ± 0.70   | 0.17 ± 0.17        | None           | SE, CI converted to SD     |



|                                     |    |       |             |             |             |                                                             |       |             |             |             |                                              |                              |
|-------------------------------------|----|-------|-------------|-------------|-------------|-------------------------------------------------------------|-------|-------------|-------------|-------------|----------------------------------------------|------------------------------|
| (Paolantonio et al. 2009)           | 6  | 98/98 | 2.33 ± 0.99 | 1.40 ± 0.99 | NR          | NR                                                          | 98/98 | 1.50 ± 0.99 | 0.50 ± 0.99 | NR          | NR                                           | End data in graphs           |
| <b>Doxycycline hyclate gel</b>      |    |       |             |             |             |                                                             |       |             |             |             |                                              |                              |
| (Ağan et al. 2006A)                 | 6  | 10/10 | 3.00        | 1.56        | NR          | None                                                        | 10/10 | 3.06        | 1.44        | NR          | None                                         | No SD                        |
| (Ağan et al. 2006B)                 |    | 8/8   | 3.11        | 1.55        | NR          |                                                             | 8/8   | 2.75        | 1.40        | NR          |                                              |                              |
| (Deo et al. 2011)                   | 6  | 30/30 | 3.03 ± 0.92 | 2.00 ± 0.64 | NR          | None                                                        | 30/30 | 2.30 ± 0.65 | 1.13 ± 1.07 | NR          | None                                         |                              |
| (Machion et al. 2004)               | 6  | NR/22 | 2.17 ± 0.93 | 1.63 ± 0.93 | 37 ± 30     | None                                                        | NR/21 | 1.76 ± 0.63 | 1.04 ± 0.71 | 36 ± 33     | NR                                           |                              |
| (Tomasi et al. 2008)                | 9  | NR/19 | 1.10 ± 0.41 | 0.80 ± 0.52 | 26% ± 38.6% | 4—painkillers, 4—chewing discomfort due to root sensitivity | NR/13 | 1.10 ± 0.50 | 0.90 ± 0.66 | 31% ± 37%   | 4—chewing discomfort due to root sensitivity | CI converted to SD           |
| <b>Metronidazole gel</b>            |    |       |             |             |             |                                                             |       |             |             |             |                                              |                              |
| (Buduneli et al. 2001)              | 12 | 18/18 | 3.20 ± 0.82 | 2.06 ± 0.59 | NR          | NR                                                          | 18/18 | 3.41 ± 0.74 | 2.12 ± 0.53 | NR          | NR                                           |                              |
| (Griffiths et al. 2000)             | 9  | 88/84 | 1.50 ± 3.89 | 0.80 ± 3.89 | 35%         | NR                                                          | 88/84 | 1.00 ± 3.89 | 0.40 ± 3.89 | 26%         | NR                                           | SE provided, converted to SD |
| (Leiknes et al. 2007)               | 6  | 21/21 | 1.90 ± 1.26 | 1.60 ± 1.72 | 38%         | NR                                                          | 21/21 | 1.80 ± 0.92 | 1.00 ± 2.02 | 33%         | NR                                           |                              |
| (Stelzel and Florès-de-Jacoby 2000) | 9  | 64/59 | 1.37 ± 0.85 | 1.01 ± 1.29 | 36% ± 31.5% | None, bitter taste in ½ of patients                         | 64/59 | 1.19 ± 0.97 | 0.94 ± 1.39 | 28% ± 35.2% | None                                         |                              |
| <b>Minocycline gel/ointment</b>     |    |       |             |             |             |                                                             |       |             |             |             |                                              |                              |
| (Jain et al. 2012)                  | 9  | 15/13 | 2.36 ± 1.04 | 2.14 ± 1.74 | 0.363       | None                                                        | 15/13 | 1.39 ± 1.02 | 1.62 ± 1.80 | 0.116       | None                                         | ITT                          |
| (Soeroso et al. 2016)               | 6  | 42/40 | 1.79 ± 0.65 | 1.79 ± 0.65 | 0.34 ± 0.41 | NR                                                          | 42/42 | 1.87 ± 0.84 | 0.73 ± 1.79 | 0.48 ± 0.41 | NR                                           | Mean differences NR          |
| (Zhao et al. 2006)                  | 6  | 32/29 | 2.11 ± 0.57 | 1.90 ± 0.63 | 55%         | NR                                                          | 32/29 | 1.44 ± 0.58 | 1.21 ± 0.57 | 59%         | NR                                           |                              |
| <b>Minocycline microspheres</b>     |    |       |             |             |             |                                                             |       |             |             |             |                                              |                              |

|                                           |    |         |             |             |               |                                                                                                                                                                 |            |             |              |               |                                             |                                                 |
|-------------------------------------------|----|---------|-------------|-------------|---------------|-----------------------------------------------------------------------------------------------------------------------------------------------------------------|------------|-------------|--------------|---------------|---------------------------------------------|-------------------------------------------------|
| (Aboelsaad et al. 2014)                   | 6  | 20/20   | 1.88 ± 0.56 | 1.10 ± 0.22 | 19%           | None                                                                                                                                                            | 20/20      | 0.95 ± 0.46 | 0.45 ± 0.71  | 18%           | None                                        |                                                 |
| (Henderson et al. 2002)                   | 6  | 15/15   | 2.50 ± 1.40 | 2.10 ± 1.50 | 47%           | NR                                                                                                                                                              | 15/15      | 1.70 ± 1.58 | 1.35 ± 1.33  | 43%           | NR                                          | Adjacent and remote sites combined and averaged |
| (Van Dyke et al. 2002)                    | 6  | 12/12   | 1.94 ± 0.73 | 1.02 ± 0.90 | NR            | 2—black hairy tongue and abscess formation                                                                                                                      | 12/10      | 1.66 ± 0.69 | 0.54 ± 0.62  | NR            | None                                        | Reported in SE, converted to SD                 |
| (103A 2000)*                              | 9  | 121/115 | 1.2 ± 0.79  | 1.01 ± 0.82 | 26% ± 25.29%  | 594—periodontitis, tooth sensitivity, tooth caries, infection, dental pain, gingivitis, headache, stomatitis, flu syndrome, dental infection, accidental injury | 124/114    | 1.04 ± 0.81 | 0.98 ± 0.88  | 27% ± 27.47%  | SRP alone—543; vehicle—589; same AE as test | ITT                                             |
|                                           |    |         |             |             | 123/112       |                                                                                                                                                                 | 0.9 ± 0.7  | 0.87 ± 0.87 | 19% ± 22.33% |               |                                             |                                                 |
|                                           |    |         |             |             | 126/115       |                                                                                                                                                                 | 1.32 ± 0.8 | 0.99 ± 1.01 | 28% ± 27.58% |               |                                             |                                                 |
| (103B 2000)*                              | 9  | 128/124 | 1.63 ± 0.8  | 1.09 ± 1.03 | 32% ± 27.21%  | 126/118                                                                                                                                                         | 1.3 ± 0.81 | 0.92 ± 0.94 | 23% ± 27.5%  |               |                                             |                                                 |
| <b>Tetracycline fibers</b>                |    |         |             |             |               |                                                                                                                                                                 |            |             |              |               |                                             |                                                 |
| (Reddy et al. 2016)                       | 12 | 16/16   | 3.00 ± 1.14 | 1.13 ± 1.11 | NR            | NR                                                                                                                                                              | 16/16      | 2.94 ± 1.01 | 0.88 ± 1.06  | NR            | NR                                          | SE converted to SD                              |
| <b>Hyaluronic acid gel</b>                |    |         |             |             |               |                                                                                                                                                                 |            |             |              |               |                                             |                                                 |
| (Eick et al. 2013)                        | 6  | 21/17   | 1.07 ± 0.36 | 1.24 ± 0.58 | 7.5% ± 24.73% | None                                                                                                                                                            | 21/17      | 0.82 ± 0.36 | 1.34 ± 0.57  | 5.2% ± 19.33% | None                                        |                                                 |
| <b>Sulfonic/sulfuric acid gel</b>         |    |         |             |             |               |                                                                                                                                                                 |            |             |              |               |                                             |                                                 |
| (Isola et al. 2018)                       | 12 | 17/15   | 2.73 ± 0.65 | 1.94 ± 0.33 | 64% ± 3.4%    | None                                                                                                                                                            | 16/14      | 1.8 ± 0.52  | 0.74 ± 0.42  | 35% ± 4.2%    | None                                        |                                                 |
| <b>Antimicrobial photodynamic therapy</b> |    |         |             |             |               |                                                                                                                                                                 |            |             |              |               |                                             |                                                 |
| (Gandhi et al. 2019)                      | 6  | 30/26   | 1.59 ± 1.07 | 1.46 ± 1.17 | 0.96          | NR                                                                                                                                                              | 30/26      | 0.52 ± 0.52 | 0.55 ± 0.56  | 0.73          | NR                                          |                                                 |
| (G. Hill et al. 2019)                     | 9  | 20/20   | 1.16 ± 1.11 | 0.93 ± 1.95 | 20%           | None                                                                                                                                                            | 20/20      | 1.16 ± 1.08 | 0.95 ± 1.77  | 18%           | None                                        | 4-6 mm subgroup data used, higher n             |

|                                          |    |       |             |             |             |                   |       |             |             |             |        |                                                  |
|------------------------------------------|----|-------|-------------|-------------|-------------|-------------------|-------|-------------|-------------|-------------|--------|--------------------------------------------------|
| (Berakdar et al. 2012)                   | 6  | 22/22 | 2.9 ± 0.8   | 2.50        | 86%         | NR                | 22/22 | 2.4 ± 0.6   | 2.00        | 77%         | NR     | No SD or SE provided for CAL                     |
| (Müller Campanile et al. 2015)           | 6  | 28/27 | 3.40 ± 1.94 | 3.70 ± 3.10 | 48%         | 2—pain/discomfort | 28/27 | 2.90 ± 1.84 | 3.00 ± 2.58 | 19%         | None   | Mean difference NR, repeated arm removed         |
| (Betsy et al. 2014)                      | 6  | 50/44 | 2.40 ± 0.86 | 2.30 ± 1.36 | 75%         | None              | 50/44 | 1.40 ± 0.90 | 1.53 ± 1.50 | 25%         | None   | Median, IQR reported, converted to mean, SD, ITT |
| (Dilsiz et al. 2013)                     | 6  | 24/24 | 1.54 ± 0.59 | 1.54 ± 1.10 | 50% ± 0.52% | None              | 24/24 | 1.42 ± 0.88 | 1.50 ± 0.88 | 46% ± 0.52% | None   | KTP arm is removed (not of interest)             |
| (Luchesi et al. 2013)                    | 6  | 21/16 | 1.59 ± 1.11 | 0.78 ± 1.54 | 63%         | None              | 21/21 | 1.50 ± 1.73 | 1.00 ± 1.69 | 55%         | None   |                                                  |
| (Malgikar et al. 2016)                   | 6  | 24/24 | 2.57 ± 0.53 | 2.55 ± 0.44 | 1.79 ± 0.49 | None              | 24/24 | 2.50 ± 0.54 | 2.63 ± 0.47 | 1.78 ± 0.37 | None   |                                                  |
| (Alwaeli et al. 2015)                    | 12 | 21/16 | 1.51 ± 1.54 | 1.48 ± 1.89 | 64%         | None              | 21/16 | 0.6 ± 1.66  | 0.13 ± 1.7  | 13%         | None   |                                                  |
| (Chondros et al. 2009)                   | 6  | 12/12 | 0.8 ± 0.5   | 0.7 ± 0.7   | 50% ± 29.6% | None              | 12/12 | 0.9 ± 0.8   | 0.5 ± 0.6   | 10% ± 42.9% | None   |                                                  |
| (Christodoulides et al. 2008)            | 6  | 12/12 | 0.9 ± 0.3   | 0.7 ± 0.3   | 44% ± 15.5% | None              | 12/12 | 0.7 ± 0.7   | 0.5 ± 0.5   | 39% ± 20.4% | None   |                                                  |
| (Theodoro et al. 2012)                   | 6  | 33/33 | 2.33 ± 1.60 | 1.56 ± 2.56 | 48%         | None              | 33/33 | 2.71 ± 1.55 | 1.98 ± 2.13 | 70%         | None   |                                                  |
|                                          |    |       |             |             |             |                   | 33/33 | 3.40 ± 1.32 | 1.99 ± 2.41 | 64%         |        |                                                  |
| <b>Subgingival antiseptic irrigation</b> |    |       |             |             |             |                   |       |             |             |             |        |                                                  |
| (Denez et al. 2016)                      | 6  | 28/20 | 1.90 ± 1.34 | 1.95 ± 0.94 | 1.30 ± 0.36 | 2—NR              | 28/20 | 1.92 ± 0.54 | 1.93 ± 0.22 | 1.53 ± 0.13 | 2 - NR | Assumed SE, converted to SD                      |

|                          |    |       |             |                |              |      |       |             |                |              |      |                          |
|--------------------------|----|-------|-------------|----------------|--------------|------|-------|-------------|----------------|--------------|------|--------------------------|
| (do Vale et al.<br>2016) | 6  | 17/14 | 1.97 ± 0.52 | 0.73 ±<br>1.07 | NR           | NR   | 17/14 | 2.05 ± 0.68 | 1.18 ±<br>1.05 | NR           | NR   |                          |
| (Krück et al.<br>2012)   | 12 | 17/17 | 1.23 ± 0.61 | 1.28 ±<br>0.91 | 27% ±<br>20% | None | 17/17 | 1.25 ± 0.56 | 1.15 ±<br>1.51 | 21% ±<br>27% | None | Mean<br>difference<br>NR |
|                          |    | 17/17 | 1.39 ± 0.52 | 1.48 ±<br>0.88 | 28% ±<br>29% |      |       |             |                |              |      |                          |

NR—not reported; ITT—intention to treat; \*additional data from Williams et al. (2001).

## S2. Sensitivity analyses

Studies with certain design parameters were removed to check for bias that could affect the effect in several sensitivity analyses.

| Sensitivity analyses       | Definition                                                                                                                                                                                                                                                                                                                                                 |
|----------------------------|------------------------------------------------------------------------------------------------------------------------------------------------------------------------------------------------------------------------------------------------------------------------------------------------------------------------------------------------------------|
| High risk of bias          | Studies at high risk of bias were excluded. High of bias was defined using the criteria in the Cochrane Collaboration's Risk of Bias tool (RoB 2.0) (Sterne et al. 2019) and overall risk of bias determined using the provided Excel worksheet (RoB2 Development Group 2019).                                                                             |
| Imputed standard deviation | In studies whereby standard deviations were not provided by the study authors, the values were re-calculated using appropriate formulas (Higgins and Green 2011; Wan et al. 2014). These studies with imputed standard deviations were excluded.                                                                                                           |
| Placebo                    | The possible influence of placebo controls was examined using two sensitivity analyses:<br>a) Head-to-head studies<br>Entire placebo-controlled studies were excluded even though studies had two or more active arms.<br>b) Only active arms<br>Placebo arms from selected studies were excluded, but the remaining active arms of the studies were kept. |
| Study design               | Studies with split-mouth or parallel groups were excluded. The design with the most studies were kept as comparator.                                                                                                                                                                                                                                       |
| Duration                   | Studies with a duration of less than twelve months were excluded.                                                                                                                                                                                                                                                                                          |

Below, the results from the changes in heterogeneity in each sensitivity analysis are presented.

**Table S6.** Sensitivity analyses of specific parameters.

| Including only studies with                   | Sensitivity analysis |                            |            |             |             |                            |             |             | n studies included |
|-----------------------------------------------|----------------------|----------------------------|------------|-------------|-------------|----------------------------|-------------|-------------|--------------------|
|                                               | PPD                  |                            |            |             | CAL         |                            |             |             |                    |
|                                               | $\tau$               | % of variance ( $\tau^2$ ) | $I^2$ (%)  | $p$ -value  | $\tau$      | % of variance ( $\tau^2$ ) | $I^2$ (%)   | $p$ -value  |                    |
| Unadjusted                                    | 0.27                 | -                          | 66.4       | < 0.0001    | 0.22        | -                          | 48.4        | 0.00        | 45                 |
| Low and some concerns of overall risk of bias | 0.29                 | 11.61                      | 67.2       | < 0.0001    | 0.19        | -26.72                     | 37.6        | 0.05        | 29                 |
| Original standard deviations                  | 0.27                 | -4.50                      | 66.4       | < 0.0001    | 0.22        | -2.27                      | 48.8        | 0.00        | 41                 |
| Active arms (no placebo control)              | 0.25                 | -13.59                     | 59.7       | 0.00        | 0.21        | -11.70                     | 42.9        | 0.02        | 35                 |
| Excluding placebo arms from three arm trials  | 0.27                 | -0.73                      | 65.8       | < 0.0001    | 0.24        | 15.75                      | 52.5        | 0.00        | 38                 |
| Split mouth design                            | <b>0.05</b>          | <b>-96.24</b>              | <b>6.6</b> | <b>0.38</b> | <b>0.12</b> | <b>-71.80</b>              | <b>21.1</b> | <b>0.22</b> | 26                 |
| Duration of less than 12 months               | 0.27                 | 1.03                       | 68         | < 0.0001    | 0.21        | -12.05                     | 46.1        | 0.00        | 40                 |

As it can be seen from the table above, removing the parallel groups from the analysis had the most important impact on the results (96% and 72% reduction of the variance). Therefore, the analysis is divided into split-mouth and parallel design with high risk of bias studies removed.

**Table S7.** Comparison of probing pocket depth (PPD) mean differences (95% CI), P-score and ranks from complete analysis and having removed studies at high risk of bias (ROB).

| Intervention   | All studies (45 trials) |              |                | Studies without high ROB (29 trials) |              |                | Only split-mouth design without high ROB (16 trials) |              |                | Only parallel design without high ROB (13 trials) |              |                |
|----------------|-------------------------|--------------|----------------|--------------------------------------|--------------|----------------|------------------------------------------------------|--------------|----------------|---------------------------------------------------|--------------|----------------|
|                | MD                      | 95% CI       | Rank (P-score) | MD                                   | 95% CI       | Rank (P-score) | MD                                                   | 95% CI       | Rank (P-score) | MD                                                | 95% CI       | Rank (P-score) |
| SMD only       | 0                       |              | 19 (0.22)      | 0                                    |              | 15 (0.21)      | 0                                                    |              | 12 (0.16)      | 0                                                 |              | 9 (0.24)       |
| Placebo        | -0.19                   | -0.45; 0.07  | 13 (0.40)      | -0.21                                | -0.49; 0.08  | 10 (0.39)      | -0.20                                                | -0.65; 0.25  | 9 (0.34)       | -0.17                                             | -0.45; 0.11  | 6 (0.44)       |
| aPDT ICG       | -0.88                   | -1.45; -0.31 | 2 (0.90)       | -0.88                                | -1.46; -0.29 | 2 (0.87)       | -0.92                                                | -1.38; -0.46 | 4 (0.82)       | Not in network                                    |              |                |
| aPDT MB 0.005% | -0.56                   | -1.11; -0.00 | 4 (0.73)       | -0.56                                | -1.13; 0.01  | 4 (0.69)       | -0.54                                                | -0.99; -0.10 | 6 (0.60)       | Not in network                                    |              |                |
| aPDT MB 1%     | -0.37                   | -0.72; -0.01 | 8 (0.59)       | -0.37                                | -0.75; 0.004 | 8 (0.56)       | -0.18                                                | -0.54; 0.19  | 10 (0.32)      | -0.69                                             | -1.14; -0.24 | 2 (0.85)       |
| aPDT PC        | -0.21                   | -0.67; 0.25  | 11 (0.44)      | -0.06                                | -0.59; 0.46  | 12 (0.30)      | Not in network                                       |              |                | -0.07                                             | -0.49; 0.34  | 7 (0.34)       |
| aPDT TBO       | 0.69                    | -0.17; 1.55  | 20 (0.04)      | 0.68                                 | -0.20; 1.56  | 16 (0.04)      | 0.70                                                 | -0.11; 1.52  | 13 (0.01)      | Not in network                                    |              |                |
| CHX 0.12%      | 0.02                    | -0.71; 0.75  | 17 (0.28)      | Not in network                       |              |                | Not in network                                       |              |                | Not in network                                    |              |                |
| CHX chip       | -0.38                   | -0.65; -0.11 | 7 (0.61)       | -0.16                                | -0.62; 0.30  | 11 (0.37)      | -0.30                                                | -0.77; 0.17  | 7 (0.42)       | 0.02                                              | -0.52; 0.55  | 8 (0.28)       |
| CHX varnish    | -0.17                   | -0.87; 0.53  | 12 (0.41)      | Not in network                       |              |                | Not in network                                       |              |                | Not in network                                    |              |                |

|                   |       |              |                           |                |              |                           |                |              |                           |                |              |                           |
|-------------------|-------|--------------|---------------------------|----------------|--------------|---------------------------|----------------|--------------|---------------------------|----------------|--------------|---------------------------|
| CHX xanthan       | -0.66 | -1.00; -0.32 | 3<br>(0.83)               | -0.47          | -0.96; 0.02  | 5<br>(0.63)               | -0.60          | -1.09; -0.11 | 5<br>(0.63)               | -0.31          | -0.87; 0.25  | 4<br>(0.57)               |
| DH                | -0.33 | -0.64; -0.01 | 9<br>(0.55)               | -0.44          | -0.87; -0.01 | 6<br>(0.61)               | -0.15          | -0.57; 0.27  | 11<br>(0.30)              | -0.90          | -1.50; -0.30 | <b>1</b><br><b>(0.93)</b> |
| HA                | -0.25 | -0.84; 0.34  | 10<br>(0.47)              | Not in network |              |                           | Not in network |              |                           | Not in network |              |                           |
| MET               | -0.08 | -0.46; 0.29  | 15<br>(0.31)              | -0.23          | -0.90; 0.43  | 9<br>(0.44)               | -0.21          | -0.78; 0.35  | 8<br>(0.35)               | Not in network |              |                           |
| MINO gel          | -0.44 | -0.83; -0.06 | 6<br>(0.66)               | -0.78          | -1.29; -0.26 | 3<br>(0.83)               | -0.97          | -1.69; -0.25 | 3<br>(0.82)               | -0.67          | -1.12; -0.22 | 3<br>(0.84)               |
| MINO microspheres | -0.44 | -0.73; -0.16 | 5<br>(0.67)               | -0.42          | -0.74; -0.11 | 7<br>(0.60)               | -0.93          | -1.35; -0.51 | 2<br>(0.83)               | -0.26          | -0.53; 0.01  | 5<br>(0.55)               |
| PI 10%            | 0.05  | -0.47; 0.57  | 18<br>(0.23)              | 0.08           | -0.64; 0.80  | 14<br>(0.24)              | Not in network |              |                           | 0.08           | -0.48; 0.64  | 11<br>(0.23)              |
| PI 7.5%           | -0.14 | -0.82; 0.54  | 14<br>(0.39)              | Not in network |              |                           | Not in network |              |                           | Not in network |              |                           |
| SA                | -1.12 | -1.77; -0.48 | <b>1</b><br><b>(0.96)</b> | -1.14          | -1.81; -0.46 | <b>1</b><br><b>(0.95)</b> | -1.13          | -1.74; -0.53 | <b>1</b><br><b>(0.91)</b> | Not in network |              |                           |
| TC                | 0.02  | -0.94; 0.98  | 16<br>(0.31)              | 0.10           | -0.88; 1.08  | 13<br>(0.26)              | Not in network |              |                           | 0.14           | -0.76; 1.03  | 10<br>(0.24)              |

**Comparison of CAL mean differences (95% CI), P-score, and ranks from complete analysis and having removed studies at high ROB.**

| Intervention | All studies (45 trials) |        |      | Studies without high ROB (29 trials) |        |      | Only split-mouth design without high ROB (16 trials) |        |                | Only parallel design without high ROB (13 trials) |        |                |
|--------------|-------------------------|--------|------|--------------------------------------|--------|------|------------------------------------------------------|--------|----------------|---------------------------------------------------|--------|----------------|
|              | MD                      | 95% CI | Rank | MD                                   | 95% CI | Rank | MD                                                   | 95% CI | Rank (P-score) | MD                                                | 95% CI | Rank (P-score) |

|                   |           |                  |                           |           |                  |                           |       |                |              |       |                |              |
|-------------------|-----------|------------------|---------------------------|-----------|------------------|---------------------------|-------|----------------|--------------|-------|----------------|--------------|
| SMD only          | 0         |                  | (P-score)<br>16<br>(0.27) | 0         |                  | (P-score)<br>12<br>(0.28) | 0     |                | 9<br>(0.31)  | 0     |                | 9<br>(0.27)  |
| Placebo           | 0.01      | -0.24;<br>0.26   | 17<br>(0.27)              | 0.07      | -0.18;<br>0.32   | 14<br>(0.23)              | 0.11  | -0.35; 0.57    | 10<br>(0.24) | 0.03  | -0.22; 0.27    | 10<br>(0.24) |
| aPDT ICG          | -<br>0.84 | -1.41; -<br>0.27 | 2<br>(0.87)               | -<br>0.84 | -1.38; -<br>0.31 | 2<br>(0.88)               | -0.86 | -1.29; -0.44   | 2<br>(0.87)  |       | Not in network |              |
| aPDT<br>MB 0.005% | -<br>0.53 | -1.05; -<br>0.01 | 5<br>(0.71)               | -<br>0.56 | -1.00; -<br>0.04 | 4<br>(0.72)               | -0.51 | -0.85; -0.16   | 4<br>(0.68)  |       | Not in network |              |
| aPDT<br>MB 1%     | -<br>0.09 | -0.42;<br>0.24   | 13<br>(0.36)              | -<br>0.06 | -0.37;<br>0.24   | 10<br>(0.36)              | 0.08  | -0.14; 0.30    | 11<br>(0.24) | -0.39 | -0.87; 0.09    | 4<br>(0.66)  |
| aPDT PC           | -<br>0.33 | -0.73;<br>0.06   | 8<br>(0.57)               | -<br>0.20 | -0.59;<br>0.19   | 9<br>(0.48)               |       | Not in network |              | -0.20 | -0.53; 0.13    | 5<br>(0.51)  |
| aPDT TBO          | 0.43      | -0.77;<br>1.62   | 20<br>(0.17)              | 0.45      | -0.73;<br>1.62   | 15<br>(0.17)              | 0.46  | -0.68; 1.60    | 12<br>(0.16) |       | Not in network |              |
| CHX 0.12%         | -<br>0.13 | -1.33;<br>1.07   | 11<br>(0.42)              |           |                  |                           |       | Not in network |              |       | Not in network |              |
| CHX chip          | -<br>0.42 | -0.66; -<br>0.19 | 6<br>(0.66)               | -<br>0.25 | -0.63;<br>0.13   | 8<br>(0.53)               | -0.10 | -0.40; 0.20    | 8<br>(0.41)  | -0.50 | -1.10; 0.10    | 3<br>(0.73)  |
| CHX varnish       | 0.03      | -0.84;<br>0.90   | 14<br>(0.32)              |           |                  |                           |       | Not in network |              |       | Not in network |              |
| CHX<br>xanthan    | -<br>0.60 | -0.97; -<br>0.24 | 4<br>(0.77)               | 0.01      | -0.65;<br>0.67   | 11<br>(0.32_)             | 0.56  | -0.83; 1.95    | 13<br>(0.16) | -0.16 | -0.85; 0.53    | 6<br>(0.46)  |
| DH                | -<br>0.33 | -0.63; -<br>0.04 | 7<br>(0.58)               | -<br>0.40 | -0.78; -<br>0.02 | 6<br>(0.65)               | -0.14 | -0.53; 0.26    | 7<br>(0.43)  | -0.84 | -1.40; -0.28   | 1<br>(0.92)  |



|                   |           |                  |                           |                |                  |                           |                |              |                           |                |              |              |
|-------------------|-----------|------------------|---------------------------|----------------|------------------|---------------------------|----------------|--------------|---------------------------|----------------|--------------|--------------|
| HA                | 0.10      | -0.48;<br>0.68   | 18<br>(0.24)              | Not in network |                  |                           | Not in network |              |                           | Not in network |              |              |
| MET               | -<br>0.10 | -0.46;<br>0.25   | 12<br>(0.37)              | -<br>0.50      | -1.26;<br>0.25   | 5<br>(0.68)               | -0.50          | -1.21; 0.20  | 5<br>(0.66)               | Not in network |              |              |
| MINO gel          | -<br>0.79 | -1.19; -<br>0.38 | 3<br>(0.86)               | -<br>0.67      | -1.11; -<br>0.22 | 3<br>(0.81)               | -0.52          | -1.62; 0.58  | 6<br>(0.64)               | -0.69          | -1.08; -0.30 | 2<br>(0.87)  |
| MINO microspheres | -<br>0.31 | -0.56; -<br>0.05 | 9<br>(0.56)               | -<br>0.25      | -0.50; -<br>0.01 | 7<br>(0.54)               | -0.65          | -0.95; -0.35 | 3<br>(0.76)               | -0.13          | -0.37; 0.11  | 7<br>(0.45)  |
| PI 10%            | 0.12      | -0.37;<br>0.61   | 19<br>(0.22)              | 0.45           | -0.42;<br>1.32   | 16<br>(0.13)              | Not in network |              |                           | 0.45           | -0.37; 1.27  | 11<br>(0.10) |
| PI 7.5%           | -<br>0.33 | -1.49;<br>0.83   | 10<br>(0.54)              | Not in network |                  |                           | Not in network |              |                           | Not in network |              |              |
| SA                | -<br>1.19 | -1.71; -<br>0.67 | <b>1</b><br><b>(0.97)</b> | -<br>1.13      | -1.60; -<br>0.66 | <b>1</b><br><b>(0.97)</b> | -1.09          | -1.58; -0.61 | <b>1</b><br><b>(0.95)</b> | Not in network |              |              |
| TC                | 0.11      | -0.79;<br>1.01   | 15<br>(0.27)              | 0.19           | -0.70;<br>1.07   | 13<br>(0.25)              | Not in network |              |                           | 0.07           | -0.80; 0.95  | 8<br>(0.30)  |

### S3. Sensitivity analyses of studies with imputed data

In studies whereby standard deviations were not provided by the study authors, the values were re-calculated using appropriate formulas (Higgins and Green 2011; Wan et al. 2014). These studies with imputed standard deviations were excluded.

Network meta-analysis forest plots without studies with imputed standard deviations

#### 1) Without Ağan et al. (2006)

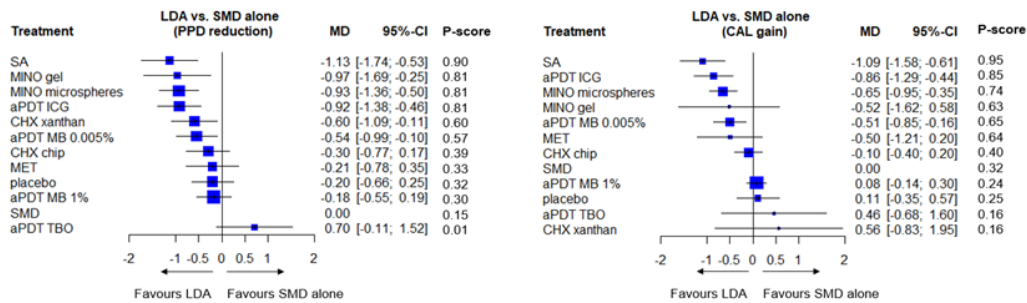

#### 2) Without Betsy et al. (2014)

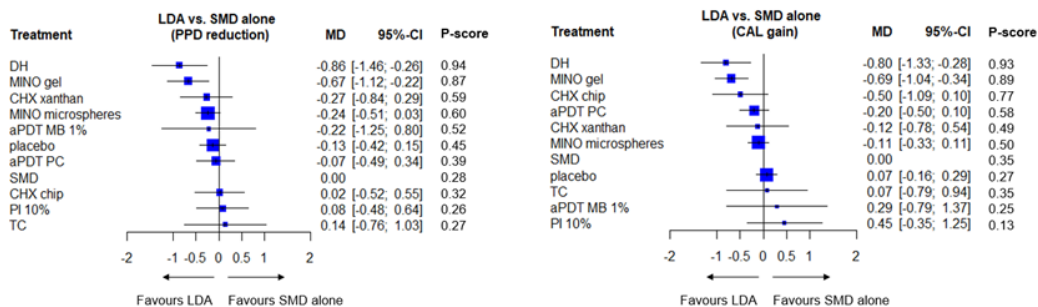

1. DH was removed from the split-mouth single application network. Still, the overall hierarchy was not affected for both PPD and CAL.
2. There was noted change in the hierarchy for aPDT MB 1% for PPD reduction (dropped to 5th rank from 2nd) with MD -0.22 mm (95% CI -1.25 to 0.80; P-score 0.52). The ranking hierarchy of the remaining LDA remained unchanged. Heterogeneity was increased to 51%. For CAL gain, aPDT MB 1% dropped from 4th to 10th rank with MD 0.28 mm (95% CI -0.79 to 1.37; P-score 0.25). However, the ranking hierarchy of the rest remained unchanged. Heterogeneity was reduced to 16.3%.

**Figure S1.** League tables.

For the league tables, treatments are arranged according to the rank of their overall effectiveness, with the direct (upper right half) and indirect (lower left half) comparisons from the highest to lowest ranked (left to right). Treatment estimates are stated as MD with 95% CIs. Pairwise comparisons that are statistically significant are highlighted in yellow. NA signifies that no direct comparisons were made between treatments. NA = not applicable.

League table of pairwise comparisons in the NMA for PPD changes with split-mouth design studies.

|                           |                           |                           |                           |                           |                           |                           |                          |                           |                           |                          |                          |                           |                           |
|---------------------------|---------------------------|---------------------------|---------------------------|---------------------------|---------------------------|---------------------------|--------------------------|---------------------------|---------------------------|--------------------------|--------------------------|---------------------------|---------------------------|
| SA                        | NA                        | NA                        | NA                        | NA                        | NA                        | NA                        | NA                       | NA                        | -0.93<br>(-1.33 to -0.53) | NA                       | NA                       | NA                        | NA                        |
| -0.20<br>(-0.94 to 0.53)  | <b>MINO micro spheres</b> | NA                        | NA                        | NA                        | NA                        | NA                        | NA                       | NA                        | NA                        | NA                       | NA                       | -0.93<br>(-1.35 to -0.51) | NA                        |
| -0.16<br>(-1.10 to 0.78)  | 0.04<br>(-0.80 to 0.88)   | <b>MINO gel</b>           | NA                        | NA                        | NA                        | NA                        | NA                       | NA                        | NA                        | NA                       | NA                       | -0.97<br>(-1.69 to -0.25) | NA                        |
| -0.21<br>(-0.97 to 0.55)  | -0.01<br>(-0.63 to 0.62)  | -0.05<br>(-0.90 to 0.81)  | <b>aPDT ICG</b>           | NA                        | NA                        | NA                        | NA                       | NA                        | NA                        | NA                       | NA                       | -0.92<br>(-1.38 to -0.46) | NA                        |
| -0.53<br>(-1.31 to 0.24)  | -0.33<br>(-0.98 to 0.32)  | -0.37<br>(-1.24 to 0.50)  | -0.32<br>(-0.99 to 0.35)  | <b>CHX xanthan</b>        | NA                        | NA                        | NA                       | NA                        | NA                        | NA                       | NA                       | -0.60<br>(-1.09 to -0.11) | NA                        |
| -0.59<br>(-1.28 to 0.10)  | -0.39<br>(-1.00 to 0.23)  | -0.43<br>(-1.27 to 0.42)  | -0.38<br>(-1.02 to 0.26)  | -0.06<br>(-0.72 to 0.60)  | <b>aPDT MB 0.005%</b>     | NA                        | NA                       | NA                        | -0.50<br>(-1.43 to 0.43)  | NA                       | NA                       | -0.50<br>(-0.99 to -0.01) | NA                        |
| -0.83<br>(-1.60 to -0.07) | -0.63<br>(-1.26 to 0.00)  | -0.67<br>(-1.53 to 0.19)  | -0.62<br>(-1.28 to 0.03)  | -0.30<br>(-0.98 to 0.38)  | -0.24<br>(-0.89 to 0.40)  | <b>CHX chip</b>           | NA                       | NA                        | NA                        | NA                       | NA                       | -0.30<br>(-0.77 to 0.17)  | NA                        |
| -0.92<br>(-1.75 to -0.10) | -0.72<br>(-1.42 to -0.01) | -0.76<br>(-1.68 to 0.16)  | -0.71<br>(-1.44 to 0.02)  | -0.39<br>(-1.13 to 0.36)  | -0.33<br>(-1.05 to 0.39)  | -0.09<br>(-0.82 to 0.64)  | <b>MET</b>               | NA                        | NA                        | NA                       | NA                       | -0.21<br>(-0.78 to 0.35)  | NA                        |
| -0.93<br>(-1.33 to -0.53) | -0.73<br>(-1.35 to -0.11) | -0.77<br>(-1.62 to 0.08)  | -0.72<br>(-1.36 to -0.08) | -0.40<br>(-1.06 to 0.27)  | -0.34<br>(-0.90 to 0.22)  | -0.10<br>(-0.75 to 0.55)  | -0.01<br>(-0.73 to 0.71) | <b>placebo</b>            | 0.12<br>(-0.37 to 0.61)   | NA                       | NA                       | -0.69<br>(-1.47 to 0.09)  | -1.07<br>(-1.87 to -0.27) |
| -0.96<br>(-1.53 to -0.38) | -0.75<br>(-1.32 to -0.19) | -0.79<br>(-1.61 to 0.02)  | -0.75<br>(-1.34 to -0.16) | -0.42<br>(-1.04 to 0.19)  | -0.37<br>(-0.91 to 0.18)  | -0.12<br>(-0.72 to 0.47)  | -0.04<br>(-0.71 to 0.64) | -0.03<br>(-0.44 to 0.38)  | <b>aPDT MB 1%</b>         | NA                       | NA                       | -0.07<br>(-0.49 to 0.35)  | NA                        |
| -0.98<br>(-1.71 to -0.25) | -0.78<br>(-1.37 to -0.19) | -0.82<br>(-1.65 to 0.01)  | -0.77<br>(-1.39 to -0.15) | -0.45<br>(-1.09 to 0.19)  | -0.39<br>(-1.00 to 0.21)  | -0.15<br>(-0.78 to 0.48)  | -0.06<br>(-0.76 to 0.64) | -0.05<br>(-0.66 to 0.56)  | -0.03<br>(-0.58 to 0.53)  | <b>DH</b>                | NA                       | -0.15<br>(-0.57 to 0.27)  | NA                        |
| -1.13<br>(-1.74 to -0.53) | -0.93<br>(-1.35 to -0.51) | -0.97<br>(-1.69 to -0.25) | -0.92<br>(-1.38 to -0.46) | -0.60<br>(-1.09 to -0.11) | -0.54<br>(-0.99 to -0.10) | -0.30<br>(-0.77 to 0.17)  | -0.21<br>(-0.78 to 0.35) | -0.20<br>(-0.65 to 0.25)  | -0.18<br>(-0.54 to 0.19)  | -0.15<br>(-0.57 to 0.27) | <b>SMD</b>               | -0.38<br>(-1.30 to 0.54)  | NA                        |
| -1.84<br>(-2.71 to -0.97) | -1.63<br>(-2.55 to -0.72) | -1.67<br>(-2.76 to -0.59) | -1.63<br>(-2.56 to -0.69) | -1.30<br>(-2.25 to -0.36) | -1.25<br>(-2.14 to -0.35) | -1.00<br>(-1.94 to -0.07) | -0.92<br>(-1.91 to 0.07) | -0.91<br>(-1.68 to -0.13) | -0.88<br>(-1.71 to -0.05) | -0.85<br>(-1.77 to 0.06) | -0.70<br>(-1.52 to 0.11) | <b>aPDT TBO</b>           | NA                        |

League table of pairwise comparisons in the NMA for CAL changes with split-mouth design studies.

|                           |                           |                           |                           |                          |                          |                          |                          |                           |                           |                          |                          |                          |
|---------------------------|---------------------------|---------------------------|---------------------------|--------------------------|--------------------------|--------------------------|--------------------------|---------------------------|---------------------------|--------------------------|--------------------------|--------------------------|
| SA                        | NA                        | NA                        | NA                        | NA                       | NA                       | NA                       | NA                       | NA                        | -1.20<br>(-1.35 to -1.05) | NA                       | NA                       | NA                       |
| -0.23<br>(-0.88 to 0.41)  | aPDT ICG                  | NA                        | NA                        | NA                       | NA                       | NA                       | NA                       | -0.86<br>(-1.29 to -0.44) | NA                        | NA                       | NA                       | NA                       |
| -0.44<br>(-1.01 to 0.13)  | -0.21<br>(-0.73 to 0.31)  | MINO micro spheres        | NA                        | NA                       | NA                       | NA                       | NA                       | -0.65<br>(-0.95 to -0.35) | NA                        | NA                       | NA                       | NA                       |
| -0.59<br>(-1.16 to -0.02) | -0.35<br>(-0.90 to 0.19)  | -0.14<br>(-0.60 to 0.32)  | aPDT MB 0.005%            | NA                       | NA                       | NA                       | NA                       | -0.50<br>(-0.86 to -0.14) | -0.70<br>(-2.02 to 0.62)  | NA                       | NA                       | NA                       |
| -0.59<br>(-1.45 to 0.27)  | -0.36<br>(-1.18 to 0.47)  | -0.15<br>(-0.92 to 0.62)  | -0.00<br>(-0.79 to 0.78)  | MET                      | NA                       | NA                       | NA                       | -0.50<br>(-1.21 to 0.20)  | NA                        | NA                       | NA                       | NA                       |
| -0.57<br>(-1.77 to 0.63)  | -0.34<br>(-1.52 to 0.84)  | -0.13<br>(-1.27 to 1.01)  | 0.01<br>(-1.14 to 1.16)   | 0.02<br>(-1.29 to 1.32)  | MINO gel                 | NA                       | NA                       | -0.52<br>(-1.62 to 0.58)  | NA                        | NA                       | NA                       | NA                       |
| -0.96<br>(-1.58 to -0.33) | -0.73<br>(-1.31 to -0.15) | -0.51<br>(-1.01 to -0.02) | -0.37<br>(-0.90 to 0.15)  | -0.37<br>(-1.18 to 0.44) | -0.38<br>(-1.55 to 0.78) | DH                       | NA                       | -0.13<br>(-0.53 to 0.26)  | NA                        | NA                       | NA                       | NA                       |
| -0.99<br>(-1.56 to -0.42) | -0.76<br>(-1.28 to -0.24) | -0.55<br>(-0.98 to -0.12) | -0.41<br>(-0.87 to 0.05)  | -0.40<br>(-1.17 to 0.37) | -0.42<br>(-1.56 to 0.72) | -0.04<br>(-0.53 to 0.46) | CHX chip                 | -0.10<br>(-0.40 to 0.20)  | NA                        | NA                       | NA                       | NA                       |
| -1.09<br>(-1.58 to -0.61) | -0.86<br>(-1.29 to -0.44) | -0.65<br>(-0.95 to -0.35) | -0.51<br>(-0.85 to -0.16) | -0.50<br>(-1.21 to 0.20) | -0.52<br>(-1.62 to 0.58) | -0.14<br>(-0.53 to 0.26) | -0.10<br>(-0.40 to 0.20) | SMD                       | 0.01<br>(-1.11 to 1.13)   | -0.08<br>(-0.30 to 0.14) | -0.42<br>(-1.61 to 0.77) | -0.56<br>(-1.95 to 0.83) |
| -1.20<br>(-1.35 to -1.05) | -0.97<br>(-1.59 to -0.34) | -0.76<br>(-1.31 to -0.21) | -0.61<br>(-1.16 to -0.06) | -0.61<br>(-1.45 to 0.23) | -0.63<br>(-1.82 to 0.56) | -0.24<br>(-0.85 to 0.36) | -0.21<br>(-0.76 to 0.34) | -0.11<br>(-0.57 to 0.35)  | placebo                   | 0.04<br>(-0.45 to 0.53)  | -0.45<br>(-1.77 to 0.91) | NA                       |
| -1.17<br>(-1.63 to -0.71) | -0.94<br>(-1.42 to -0.46) | -0.73<br>(-1.10 to -0.35) | -0.58<br>(-0.99 to -0.18) | -0.58<br>(-1.32 to 0.16) | -0.60<br>(-1.72 to 0.52) | -0.21<br>(-0.66 to 0.24) | -0.18<br>(-0.55 to 0.20) | -0.08<br>(-0.30 to 0.14)  | 0.03<br>(-0.40 to 0.46)   | aPDT MB 1%               | NA                       | NA                       |
| -1.55<br>(-2.73 to -0.38) | -1.32<br>(-2.54 to -0.11) | -1.11<br>(-2.29 to 0.07)  | -0.97<br>(-2.15 to 0.22)  | -0.96<br>(-2.30 to 0.38) | -0.98<br>(-2.56 to 0.60) | -0.60<br>(-1.80 to 0.61) | -0.56<br>(-1.74 to 0.62) | -0.46<br>(-1.60 to 0.68)  | -0.35<br>(-1.52 to 0.81)  | -0.38<br>(-1.53 to 0.77) | aPDT TBO                 | NA                       |
| -1.65<br>(-3.12 to -0.18) | -1.42<br>(-2.87 to 0.03)  | -1.21<br>(-2.63 to 0.21)  | -1.07<br>(-2.49 to 0.36)  | -1.06<br>(-2.62 to 0.49) | -1.08<br>(-2.85 to 0.69) | -0.69<br>(-2.14 to 0.75) | -0.66<br>(-2.08 to 0.76) | -0.56<br>(-1.95 to 0.83)  | -0.45<br>(-1.91 to 1.01)  | -0.48<br>(-1.89 to 0.92) | -0.10<br>(-1.89 to 1.69) | CHX xanthan              |

League table of pairwise comparisons in the NMA for PPD changes with parallel design studies.

|                           |                           |                           |                          |                          |                           |                          |                          |                           |                          |                          |    |
|---------------------------|---------------------------|---------------------------|--------------------------|--------------------------|---------------------------|--------------------------|--------------------------|---------------------------|--------------------------|--------------------------|----|
| DH                        | NA                        | NA                        | NA                       | NA                       | -0.73<br>(-1.26 to -0.20) | NA                       | NA                       | NA                        | NA                       | NA                       | NA |
| -0.21<br>(-0.94 to 0.51)  | aPDT MB 1%                | NA                        | NA                       | NA                       | -0.09<br>(-1.07 to 0.89)  | NA                       | NA                       | -0.80<br>(-1.30 to -0.30) | NA                       | NA                       | NA |
| -0.23<br>(-0.98 to 0.52)  | -0.02<br>(-0.66 to 0.62)  | MINO gel                  | NA                       | NA                       | NA                        | NA                       | NA                       | -0.67<br>(-1.12 to -0.22) | NA                       | NA                       | NA |
| -0.59<br>(-1.31 to 0.13)  | -0.38<br>(-1.07 to 0.32)  | -0.36<br>(-1.08 to 0.36)  | CHX xanthan              | NA                       | -0.14<br>(-0.62 to 0.34)  | NA                       | NA                       | NA                        | NA                       | NA                       | NA |
| -0.64<br>(-1.24 to -0.04) | -0.43<br>(-0.94 to 0.08)  | -0.41<br>(-0.94 to 0.11)  | -0.05<br>(-0.61 to 0.51) | MINO micro spheres       | -0.11<br>(-0.40 to 0.19)  | NA                       | NA                       | -0.24<br>(-0.51 to 0.03)  | NA                       | NA                       | NA |
| -0.73<br>(-1.26 to -0.20) | -0.52<br>(-1.02 to -0.02) | -0.50<br>(-1.03 to 0.03)  | -0.14<br>(-0.62 to 0.34) | -0.09<br>(-0.37 to 0.20) | placebo                   | NA                       | NA                       | -0.13<br>(-0.42 to 0.16)  | NA                       | NA                       | NA |
| -0.83<br>(-1.55 to -0.10) | -0.62<br>(-1.23 to 0.00)  | -0.60<br>(-1.21 to 0.01)  | -0.24<br>(-0.93 to 0.46) | -0.19<br>(-0.68 to 0.31) | -0.10<br>(-0.60 to 0.40)  | aPDT PC                  | NA                       | -0.07<br>(-0.49 to 0.34)  | NA                       | NA                       | NA |
| -0.92<br>(-1.72 to -0.11) | -0.70<br>(-1.41 to 0.00)  | -0.69<br>(-1.39 to 0.02)  | -0.33<br>(-1.10 to 0.45) | -0.27<br>(-0.88 to 0.33) | -0.19<br>(-0.79 to 0.42)  | -0.09<br>(-0.77 to 0.59) | CHX chip                 | 0.02<br>(-0.52 to 0.55)   | -0.56<br>(-1.69 to 0.57) | NA                       | NA |
| -0.90<br>(-1.50 to -0.30) | -0.69<br>(-1.14 to -0.24) | -0.67<br>(-1.12 to -0.22) | -0.31<br>(-0.87 to 0.25) | -0.26<br>(-0.53 to 0.01) | -0.17<br>(-0.45 to 0.11)  | -0.07<br>(-0.49 to 0.34) | 0.02<br>(-0.52 to 0.55)  | SMD                       | 0.06<br>(-0.88 to 1.00)  | -0.08<br>(-0.64 to 0.48) | NA |
| -1.04<br>(-2.11 to 0.04)  | -0.82<br>(-1.83 to 0.18)  | -0.81<br>(-1.81 to 0.20)  | -0.45<br>(-1.50 to 0.61) | -0.39<br>(-1.33 to 0.54) | -0.31<br>(-1.25 to 0.63)  | -0.21<br>(-1.20 to 0.78) | -0.12<br>(-1.08 to 0.84) | -0.14<br>(-1.03 to 0.76)  | TC                       | NA                       | NA |
| -0.98<br>(-1.80 to -0.16) | -0.77<br>(-1.49 to -0.05) | -0.75<br>(-1.47 to -0.03) | -0.39<br>(-1.18 to 0.40) | -0.34<br>(-0.96 to 0.28) | -0.25<br>(-0.88 to 0.38)  | -0.15<br>(-0.85 to 0.55) | -0.06<br>(-0.84 to 0.71) | -0.08<br>(-0.64 to 0.48)  | 0.06<br>(-1.00 to 1.11)  | PI 10%                   | NA |

League table of pairwise comparisons in the NMA for CAL changes with parallel design studies.

|                           |                           |                          |                          |                          |                          |                          |                          |                           |                           |                          |
|---------------------------|---------------------------|--------------------------|--------------------------|--------------------------|--------------------------|--------------------------|--------------------------|---------------------------|---------------------------|--------------------------|
| DH                        | NA                        | NA                       | NA                       | NA                       | NA                       | NA                       | NA                       | NA                        | -0.87<br>(-1.37 to -0.37) | NA                       |
| -0.15<br>(-0.83 to 0.53)  | MINO gel                  | NA                       | NA                       | NA                       | NA                       | NA                       | NA                       | -0.69<br>(-1.08 to -0.30) | NA                        | NA                       |
| -0.34<br>(-1.16 to 0.48)  | -0.19<br>(-0.91 to 0.53)  | CHX chip                 | NA                       | NA                       | NA                       | NA                       | -1.00<br>(-2.00 to 0.00) | -0.50<br>(-1.10 to 0.10)  | NA                        | NA                       |
| -0.45<br>(-1.17 to 0.27)  | -0.30<br>(-0.92 to 0.32)  | -0.11<br>(-0.88 to 0.66) | aPDT MB 1%               | NA                       | NA                       | NA                       | NA                       | -0.55<br>(-1.09 to -0.01) | 0.22<br>(-0.85 to 1.29)   | NA                       |
| -0.64<br>(-1.29 to 0.01)  | -0.49<br>(-1.00 to 0.02)  | -0.30<br>(-0.99 to 0.39) | -0.19<br>(-0.77 to 0.39) | aPDT PC                  | NA                       | NA                       | NA                       | -0.20<br>(-0.53 to 0.13)  | NA                        | NA                       |
| -0.68<br>(-1.50 to 0.14)  | -0.53<br>(-1.32 to 0.26)  | -0.34<br>(-1.25 to 0.58) | -0.23<br>(-1.05 to 0.60) | -0.04<br>(-0.80 to 0.72) | CHX xanthan              | NA                       | NA                       | NA                        | -0.19<br>(-0.83 to 0.45)  | NA                       |
| -0.71<br>(-1.27 to -0.15) | -0.56<br>(-1.01 to -0.10) | -0.37<br>(-1.02 to 0.28) | -0.26<br>(-0.78 to 0.27) | -0.07<br>(-0.47 to 0.34) | -0.03<br>(-0.72 to 0.66) | MINO micro spheres       | NA                       | -0.12<br>(-0.36 to 0.12)  | -0.15<br>(-0.41 to 0.10)  | NA                       |
| -0.91<br>(-1.95 to 0.13)  | -0.76<br>(-1.72 to 0.19)  | -0.57<br>(-1.48 to 0.33) | -0.46<br>(-1.46 to 0.54) | -0.27<br>(-1.21 to 0.66) | -0.23<br>(-1.35 to 0.88) | -0.21<br>(-1.11 to 0.70) | TC                       | -0.25<br>(-1.18 to 0.68)  | NA                        | NA                       |
| -0.84<br>(-1.40 to -0.28) | -0.69<br>(-1.08 to -0.30) | -0.50<br>(-1.10 to 0.10) | -0.39<br>(-0.87 to 0.09) | -0.20<br>(-0.53 to 0.13) | -0.16<br>(-0.85 to 0.53) | -0.13<br>(-0.37 to 0.11) | 0.07<br>(-0.80 to 0.95)  | SMD                       | -0.09<br>(-0.35 to 0.16)  | -0.45<br>(-1.27 to 0.37) |
| -0.87<br>(-1.37 to -0.37) | -0.72<br>(-1.18 to -0.26) | -0.53<br>(-1.18 to 0.12) | -0.42<br>(-0.94 to 0.10) | -0.23<br>(-0.64 to 0.18) | -0.19<br>(-0.83 to 0.45) | -0.16<br>(-0.41 to 0.09) | 0.04<br>(-0.87 to 0.95)  | -0.03<br>(-0.27 to 0.22)  | placebo                   | NA                       |
| -1.29<br>(-2.28 to -0.30) | -1.14<br>(-2.05 to -0.23) | -0.95<br>(-1.97 to 0.07) | -0.84<br>(-1.79 to 0.11) | -0.65<br>(-1.53 to 0.23) | -0.61<br>(-1.68 to 0.46) | -0.58<br>(-1.44 to 0.27) | -0.38<br>(-1.58 to 0.82) | -0.45<br>(-1.27 to 0.37)  | -0.42<br>(-1.28 to 0.43)  | PI 10%                   |

Figure S2. Inconsistency plot for the network meta-analysis.

1) Inconsistency plot for the network meta-analysis of PPD and CAL changes in split-mouth design studies

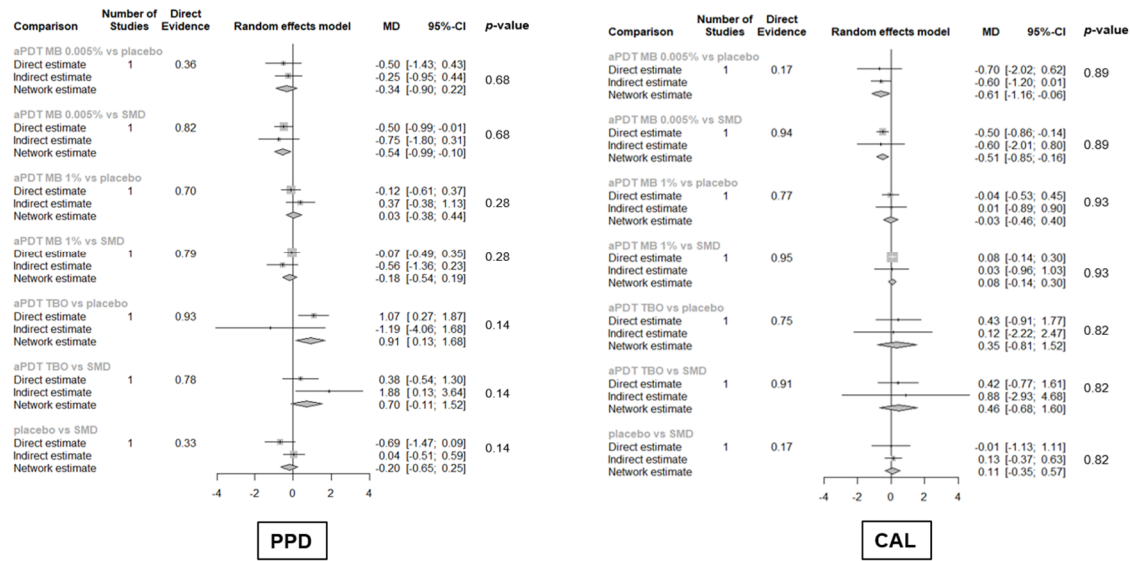

2) Inconsistency plot for the network meta-analysis of PPD and CAL changes in parallel design studies

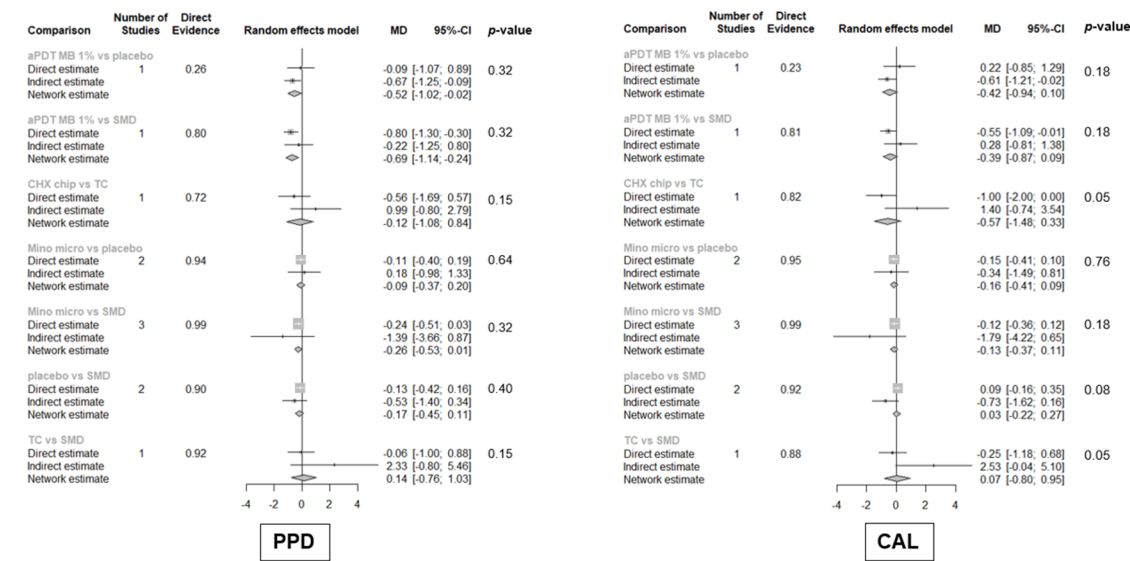

**Figure S3.** Comparison-adjusted funnel plot for publication and small-study bias.

1) Comparison-adjusted funnel plot for the network of single LDA application with split-mouth design for PPD and CAL changes

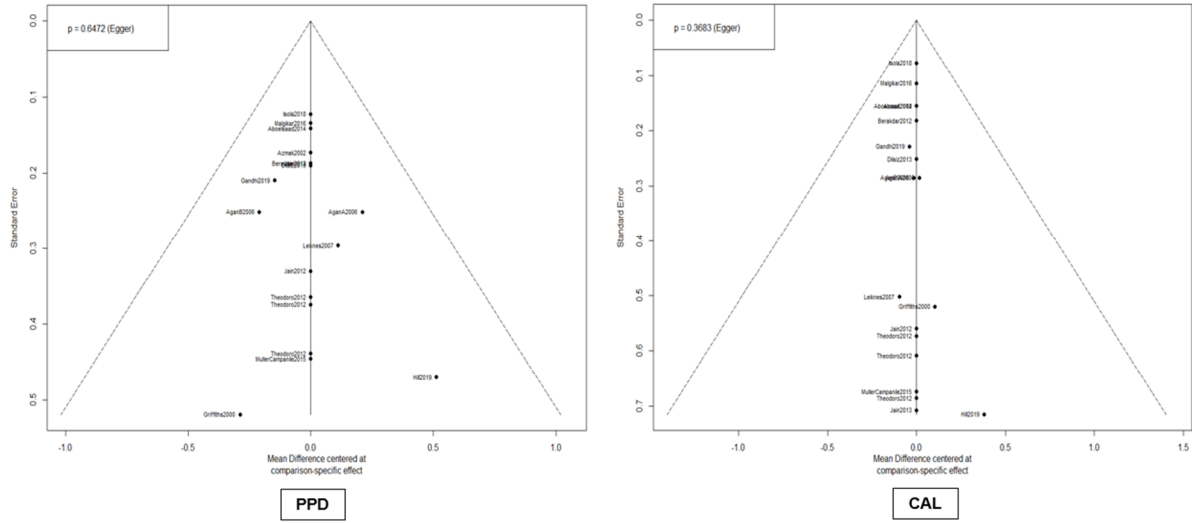

2) Comparison-adjusted funnel plot for the network of single LDA application with parallel design for PPD and CAL changes

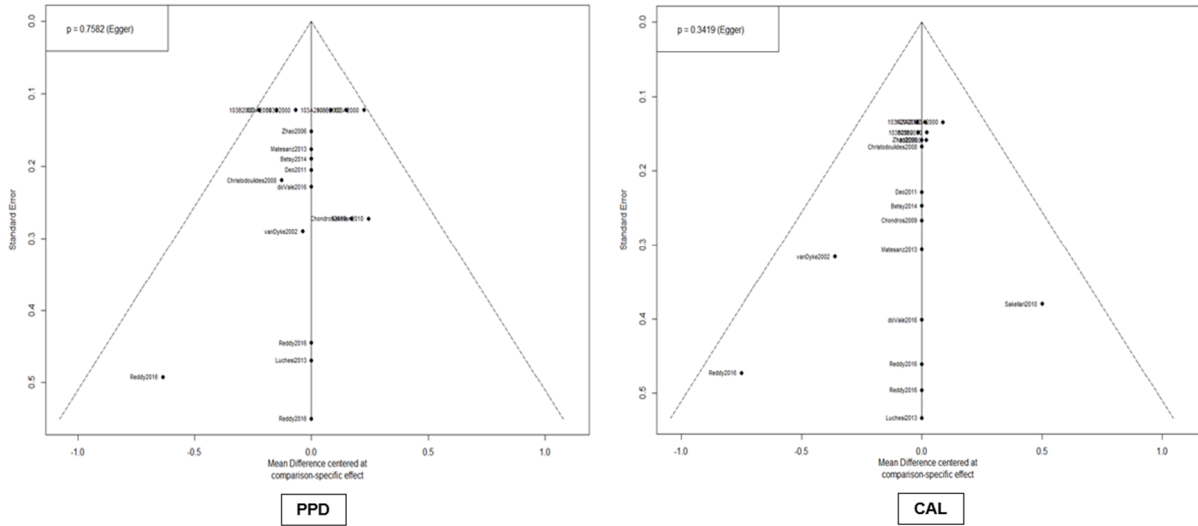

**Table S8.** Grading of Recommendations Assessment, Development and Evaluation (GRADE) certainty of evidence for primary outcomes.

Mean differences (95% CIs) and certainty of evidence for PPD changes in split-mouth design

| Comparisons               | GRADE                    |                               |                          |                               |                          |                                  |
|---------------------------|--------------------------|-------------------------------|--------------------------|-------------------------------|--------------------------|----------------------------------|
|                           | Direct evidence          |                               | Indirect evidence        |                               | Network meta-analysis    |                                  |
|                           | Mean difference (95% CI) | Certainty of evidence         | Mean difference (95% CI) | Certainty of evidence         | Mean difference (95% CI) | Certainty of evidence            |
| <b>aPDT ICG vs.</b>       |                          |                               |                          |                               |                          |                                  |
| aPDT MB 0.005%            | -                        | -                             | -0.38 (-1.02 to 0.26)    | ⊕⊕○○ <sup>e, c</sup><br>Low   | -0.38 (-1.02 to 0.26)    | ⊕○○○ <sup>c, f</sup><br>Very Low |
| aPDT MB 1%                | -                        | -                             | -0.75 (-1.34 to -0.16)   | ⊕⊕⊕○ <sup>e</sup><br>Moderate | -0.75 (-1.34 to -0.16)   | ⊕⊕⊕○ <sup>e</sup><br>Moderate    |
| aPDT TBO                  | -                        | -                             | -1.63 (-2.56 to -0.69)   | ⊕⊕⊕○ <sup>e</sup><br>Moderate | -1.63 (-2.56 to -0.69)   | ⊕⊕⊕○ <sup>e</sup><br>Moderate    |
| CHX chip                  | -                        | -                             | -0.62 (-1.28 to 0.03)    | ⊕⊕⊕○ <sup>e</sup><br>Moderate | -0.62 (-1.28 to 0.03)    | ⊕⊕○○ <sup>e, c</sup><br>Low      |
| CHX xanthan               | -                        | -                             | -0.32 (-0.99 to 0.35)    | ⊕⊕○○ <sup>e, c</sup><br>Low   | -0.32 (-0.99 to 0.35)    | ⊕○○○ <sup>c, f</sup><br>Very Low |
| DH                        | -                        | -                             | -0.77 (-1.39 to -0.15)   | ⊕⊕⊕○ <sup>e</sup><br>Moderate | -0.77 (-1.39 to -0.15)   | ⊕⊕⊕○ <sup>e</sup><br>Moderate    |
| MET                       | -                        | -                             | -0.71 (-1.44 to 0.02)    | ⊕⊕○○ <sup>e, c</sup><br>Low   | -0.71 (-1.44 to 0.02)    | ⊕○○○ <sup>c, f</sup><br>Very Low |
| MINO gel                  | -                        | -                             | 0.05 (-0.81 to 0.90)     | ⊕⊕○○ <sup>e, c</sup><br>Low   | 0.05 (-0.81 to 0.90)     | ⊕○○○ <sup>c, f</sup><br>Very Low |
| MINO microspheres         | -                        | -                             | 0.01 (-0.62 to 0.63)     | ⊕⊕○○ <sup>e, c</sup><br>Low   | 0.01 (-0.62 to 0.63)     | ⊕○○○ <sup>c, f</sup><br>Very Low |
| placebo                   | -                        | -                             | -0.72 (-1.36 to -0.08)   | ⊕⊕○○ <sup>e, c</sup><br>Low   | -0.72 (-1.36 to -0.08)   | ⊕⊕⊕○ <sup>e</sup><br>Moderate    |
| SA                        | -                        | -                             | 0.21 (-0.55 to 0.97)     | ⊕⊕○○ <sup>e, c</sup><br>Low   | 0.21 (-0.55 to 0.97)     | ⊕⊕○○ <sup>e, c</sup><br>Low      |
| SMD                       | -0.92 (-1.38 to -0.46)   | ⊕⊕⊕○ <sup>a</sup><br>Moderate | -                        | -                             | -0.92 (-1.38 to -0.46)   | ⊕⊕⊕○ <sup>e</sup><br>Moderate    |
| <b>aPDT MB 0.005% vs.</b> |                          |                               |                          |                               |                          |                                  |
| aPDT MB 1%                | -                        | -                             | -0.37 (-0.91 to 0.18)    | ⊕⊕○○ <sup>e, c</sup><br>Low   | -0.37 (-0.91 to 0.18)    | ⊕○○○ <sup>c, f</sup><br>Very Low |
| aPDT TBO                  | -                        | -                             | -1.25 (-2.14 to -0.35)   | ⊕⊕⊕○ <sup>e</sup><br>Moderate | -1.25 (-2.14 to -0.35)   | ⊕⊕⊕○ <sup>e</sup><br>Moderate    |



|                       |                        |                               |                        |                               |                        |                                  |
|-----------------------|------------------------|-------------------------------|------------------------|-------------------------------|------------------------|----------------------------------|
| CHX chip              | -                      | -                             | -0.24 (-0.89 to 0.40)  | ⊕⊕○○ <sup>e, c</sup><br>Low   | -0.24 (-0.89 to 0.40)  | ⊕○○○ <sup>c, f</sup><br>Very Low |
| CHX xanthan           | -                      | -                             | 0.06 (-0.60 to 0.72)   | ⊕⊕○○ <sup>e, c</sup><br>Low   | 0.06 (-0.60 to 0.72)   | ⊕○○○ <sup>c, f</sup><br>Very Low |
| DH                    | -                      | -                             | -0.39 (-1.00 to 0.21)  | ⊕⊕○○ <sup>e, c</sup><br>Low   | -0.39 (-1.00 to 0.21)  | ⊕○○○ <sup>c, f</sup><br>Very Low |
| MET                   | -                      | -                             | -0.33 (-1.05 to 0.39)  | ⊕⊕○○ <sup>e, c</sup><br>Low   | -0.33 (-1.05 to 0.39)  | ⊕○○○ <sup>c, f</sup><br>Very Low |
| MINO gel              | -                      | -                             | 0.43 (-0.42 to 1.27)   | ⊕⊕○○ <sup>e, c</sup><br>Low   | 0.43 (-0.42 to 1.27)   | ⊕○○○ <sup>c, f</sup><br>Very Low |
| MINO microspheres     | -                      | -                             | 0.39 (-0.23 to 1.00)   | ⊕⊕○○ <sup>e, c</sup><br>Low   | 0.39 (-0.23 to 1.00)   | ⊕○○○ <sup>c, f</sup><br>Very Low |
| placebo               | -0.50 (-1.43 to 0.43)  | ⊕⊕○○ <sup>a, c</sup><br>Low   | -0.25 (-0.95 to 0.44)  | ⊕⊕○○ <sup>e, c</sup><br>Low   | -0.34 (-0.90 to 0.22)  | ⊕○○○ <sup>c, f</sup><br>Very Low |
| SA                    | -                      | -                             | 0.59 (-0.1 to 1.28)    | ⊕⊕○○ <sup>e, c</sup><br>Low   | 0.59 (-0.1 to 1.28)    | ⊕○○○ <sup>c, f</sup><br>Very Low |
| SMD                   | -0.50 (-0.99 to -0.01) | ⊕⊕⊕○ <sup>a</sup><br>Moderate | -0.75 (-1.80 to 0.31)  | ⊕⊕○○ <sup>e, c</sup><br>Low   | -0.54 (-0.99 to -0.10) | ⊕⊕⊕○ <sup>e</sup><br>Moderate    |
| <b>aPDT MB 1% vs.</b> |                        |                               |                        |                               |                        |                                  |
| aPDT TBO              | -                      | -                             | -0.88 (-1.71 to -0.05) | ⊕⊕⊕○ <sup>e</sup><br>Moderate | -0.88 (-1.71 to -0.05) | ⊕⊕⊕○ <sup>e</sup><br>Moderate    |
| CHX chip              | -                      | -                             | 0.12 (-0.47 to 0.72)   | ⊕⊕○○ <sup>e, c</sup><br>Low   | 0.12 (-0.47 to 0.72)   | ⊕○○○ <sup>c, f</sup><br>Very Low |
| CHX xanthan           | -                      | -                             | 0.42 (-0.19 to 1.04)   | ⊕⊕○○ <sup>e, c</sup><br>Low   | 0.42 (-0.19 to 1.04)   | ⊕○○○ <sup>c, f</sup><br>Very Low |
| DH                    | -                      | -                             | -0.03 (-0.58 to 0.53)  | ⊕⊕○○ <sup>e, c</sup><br>Low   | -0.03 (-0.58 to 0.53)  | ⊕○○○ <sup>c, f</sup><br>Very Low |
| MET                   | -                      | -                             | 0.04 (-0.64 to 0.71)   | ⊕⊕○○ <sup>e, c</sup><br>Low   | 0.04 (-0.64 to 0.71)   | ⊕○○○ <sup>c, f</sup><br>Very Low |
| MINO gel              | -                      | -                             | 0.79 (-0.02 to 1.61)   | ⊕⊕○○ <sup>e, c</sup><br>Low   | 0.79 (-0.02 to 1.61)   | ⊕○○○ <sup>c, f</sup><br>Very Low |
| MINO microspheres     | -                      | -                             | 0.75 (0.19 to 1.32)    | ⊕⊕⊕○ <sup>e</sup><br>Moderate | 0.75 (0.19 to 1.32)    | ⊕⊕⊕○ <sup>e</sup><br>Moderate    |
| placebo               | -0.12 (-0.37 to 0.61)  | ⊕⊕○○ <sup>a, c</sup><br>Low   | 0.03 (-0.38 to 0.44)   | ⊕⊕○○ <sup>e, c</sup><br>Low   | 0.03 (-0.38 to 0.44)   | ⊕○○○ <sup>c, f</sup><br>Very Low |
| SA                    | -                      | -                             | 0.96 (0.38 to 1.53)    | ⊕⊕⊕○ <sup>e</sup><br>Moderate | 0.96 (0.38 to 1.53)    | ⊕⊕⊕○ <sup>e</sup><br>Moderate    |

|                     |                       |                               |                       |                                  |                       |                                  |
|---------------------|-----------------------|-------------------------------|-----------------------|----------------------------------|-----------------------|----------------------------------|
| SMD                 | -0.07 (-0.49 to 0.35) | ⊕⊕○○ <sup>a, c</sup><br>Low   | -0.56 (-1.36 to 0.23) | ⊕⊕○○ <sup>e, c</sup><br>Low      | -0.18 (-0.54 to 0.19) | ⊕○○○ <sup>c, f</sup><br>Very Low |
| <b>aPDT TBO vs.</b> |                       |                               |                       |                                  |                       |                                  |
| CHX chip            | -                     | -                             | 1.00 (0.07 to 1.94)   | ⊕⊕⊕○ <sup>e</sup><br>Moderate    | 1.00 (0.07 to 1.94)   | ⊕⊕⊕○ <sup>e</sup><br>Moderate    |
| CHX xanthan         | -                     | -                             | 1.30 (0.36 to 2.25)   | ⊕⊕⊕○ <sup>e</sup><br>Moderate    | 1.30 (0.36 to 2.25)   | ⊕⊕⊕○ <sup>e</sup><br>Moderate    |
| DH                  | -                     | -                             | 0.85 (-0.06 to 1.77)  | ⊕⊕○○ <sup>e, c</sup><br>Low      | 0.85 (-0.06 to 1.77)  | ⊕○○○ <sup>c, f</sup><br>Very Low |
| MET                 | -                     | -                             | 0.92 (-0.07 to 1.91)  | ⊕⊕○○ <sup>e, c</sup><br>Low      | 0.92 (-0.07 to 1.91)  | ⊕○○○ <sup>c, f</sup><br>Very Low |
| MINO gel            | -                     | -                             | 1.67 (0.59 to 2.76)   | ⊕⊕⊕○ <sup>e</sup><br>Moderate    | 1.67 (0.59 to 2.76)   | ⊕⊕⊕○ <sup>e</sup><br>Moderate    |
| MINO microspheres   | -                     | -                             | 1.63 (0.72 to 2.55)   | ⊕⊕⊕○ <sup>e</sup><br>Moderate    | 1.63 (0.72 to 2.55)   | ⊕⊕⊕○ <sup>e</sup><br>Moderate    |
| placebo             | 1.07 (0.27 to 1.87)   | ⊕⊕⊕○ <sup>a</sup><br>Moderate | -1.19 (-4.06 to 1.68) | ⊕○○○ <sup>d, f</sup><br>Very Low | 0.91 (0.13 to 1.68)   | ⊕⊕⊕○ <sup>e</sup><br>Moderate    |
| SA                  | -                     | -                             | 1.84 (-0.97 to 2.71)  | ⊕⊕○○ <sup>e, c</sup><br>Low      | 1.84 (-0.97 to 2.71)  | ⊕○○○ <sup>c, f</sup><br>Very Low |
| SMD                 | 0.38 (-0.54 to 1.30)  | ⊕⊕○○ <sup>a, c</sup><br>Low   | 1.88 (0.13 to 3.64)   | ⊕⊕⊕○ <sup>e</sup><br>Moderate    | 0.70 (-0.11 to 1.52)  | ⊕⊕○○ <sup>e, c</sup><br>Low      |
| <b>CHX chip vs.</b> |                       |                               |                       |                                  |                       |                                  |
| CHX xanthan         | -                     | -                             | 0.30 (-0.38 to 0.98)  | ⊕⊕○○ <sup>e, c</sup><br>Low      | 0.30 (-0.38 to 0.98)  | ⊕○○○ <sup>c, f</sup><br>Very Low |
| DH                  | -                     | -                             | -0.15 (-0.78 to 0.48) | ⊕⊕○○ <sup>e, c</sup><br>Low      | -0.15 (-0.78 to 0.48) | ⊕○○○ <sup>c, f</sup><br>Very Low |
| MET                 | -                     | -                             | -0.09 (-0.82 to 0.64) | ⊕⊕○○ <sup>e, c</sup><br>Low      | -0.09 (-0.82 to 0.64) | ⊕○○○ <sup>c, f</sup><br>Very Low |
| MINO gel            | -                     | -                             | 0.67 (-0.19 to 1.53)  | ⊕⊕○○ <sup>e, c</sup><br>Low      | 0.67 (-0.19 to 1.53)  | ⊕○○○ <sup>c, f</sup><br>Very Low |
| MINO microspheres   | -                     | -                             | 0.63 (0.00 to 1.26)   | ⊕⊕⊕○ <sup>e</sup><br>Moderate    | 0.63 (0.00 to 1.26)   | ⊕⊕⊕○ <sup>e</sup><br>Moderate    |
| placebo             | -                     | -                             | -0.10 (-0.75 to 0.55) | ⊕⊕○○ <sup>e, c</sup><br>Low      | -0.10 (-0.75 to 0.55) | ⊕○○○ <sup>c, f</sup><br>Very Low |
| SA                  | -                     | -                             | 0.83 (0.07 to 1.60)   | ⊕⊕⊕○ <sup>e</sup><br>Moderate    | 0.83 (0.07 to 1.60)   | ⊕⊕⊕○ <sup>e</sup><br>Moderate    |

|                        |                        |                               |                       |                               |                        |                                 |
|------------------------|------------------------|-------------------------------|-----------------------|-------------------------------|------------------------|---------------------------------|
| SMD                    | -0.30 (-0.77 to 0.17)  | ⊕⊕○○ <sup>a,c</sup><br>Low    | -                     | -                             | -0.30 (-0.77 to 0.17)  | ⊕○○○ <sup>c,f</sup><br>Very Low |
| <b>CHX xanthan vs.</b> |                        |                               |                       |                               |                        |                                 |
| DH                     | -                      | -                             | -0.45 (-1.09 to 0.19) | ⊕⊕○○ <sup>e,c</sup><br>Low    | -0.45 (-1.09 to 0.19)  | ⊕○○○ <sup>c,f</sup><br>Very Low |
| MET                    | -                      | -                             | -0.39 (-1.13 to 0.36) | ⊕⊕○○ <sup>e,c</sup><br>Low    | -0.39 (-1.13 to 0.36)  | ⊕○○○ <sup>c,f</sup><br>Very Low |
| MINO gel               | -                      | -                             | 0.37 (-0.50 to 1.24)  | ⊕⊕○○ <sup>e,c</sup><br>Low    | 0.37 (-0.50 to 1.24)   | ⊕○○○ <sup>c,f</sup><br>Very Low |
| MINO microspheres      | -                      | -                             | 0.33 (-0.32 to 0.98)  | ⊕⊕○○ <sup>e,c</sup><br>Low    | 0.33 (-0.32 to 0.98)   | ⊕○○○ <sup>c,f</sup><br>Very Low |
| placebo                | -                      | -                             | -0.40 (-1.06 to 0.27) | ⊕⊕○○ <sup>e,c</sup><br>Low    | -0.40 (-1.06 to 0.27)  | ⊕○○○ <sup>c,f</sup><br>Very Low |
| SA                     | -                      | -                             | 0.53 (-0.24 to 1.31)  | ⊕⊕○○ <sup>e,c</sup><br>Low    | 0.53 (-0.24 to 1.31)   | ⊕○○○ <sup>c,f</sup><br>Very Low |
| SMD                    | -0.60 (-1.09 to -0.11) | ⊕⊕⊕○ <sup>a</sup><br>Moderate | -                     | -                             | -0.60 (-1.09 to -0.11) | ⊕⊕⊕○ <sup>e</sup><br>Moderate   |
| <b>DH vs.</b>          |                        |                               |                       |                               |                        |                                 |
| MET                    | -                      | -                             | 0.06 (-0.64 to 0.76)  | ⊕⊕○○ <sup>e,c</sup><br>Low    | 0.06 (-0.64 to 0.76)   | ⊕○○○ <sup>c,f</sup><br>Very Low |
| MINO gel               | -                      | -                             | 0.82 (-0.01 to 1.65)  | ⊕⊕○○ <sup>e,c</sup><br>Low    | 0.82 (-0.01 to 1.65)   | ⊕○○○ <sup>c,f</sup><br>Very Low |
| MINO microspheres      | -                      | -                             | 0.78 (0.19 to 1.37)   | ⊕⊕⊕○ <sup>e</sup><br>Moderate | 0.78 (0.19 to 1.37)    | ⊕⊕⊕○ <sup>e</sup><br>Moderate   |
| placebo                | -                      | -                             | 0.05 (0.56 to 0.66)   | ⊕⊕⊕○ <sup>e</sup><br>Moderate | 0.05 (0.56 to 0.66)    | ⊕⊕⊕○ <sup>e</sup><br>Moderate   |
| SA                     | -                      | -                             | 0.98 (0.25 to 1.71)   | ⊕⊕⊕○ <sup>e</sup><br>Moderate | 0.98 (0.25 to 1.71)    | ⊕⊕⊕○ <sup>e</sup><br>Moderate   |
| SMD                    | -0.15 (-0.57 to 0.27)  | ⊕⊕○○ <sup>a,c</sup><br>Low    | -                     | -                             | -0.15 (-0.57 to 0.27)  | ⊕○○○ <sup>c,f</sup><br>Very Low |
| <b>MET vs.</b>         |                        |                               |                       |                               |                        |                                 |
| MINO gel               | -                      | -                             | 0.76 (-0.16 to 1.68)  | ⊕⊕○○ <sup>e,c</sup><br>Low    | 0.76 (-0.16 to 1.68)   | ⊕○○○ <sup>c,f</sup><br>Very Low |
| MINO microspheres      | -                      | -                             | 0.72 (0.01 to 1.42)   | ⊕⊕⊕○ <sup>e</sup><br>Moderate | 0.72 (0.01 to 1.42)    | ⊕⊕⊕○ <sup>e</sup><br>Moderate   |
| placebo                | -                      | -                             | -0.01 (-0.73 to 0.71) | ⊕⊕○○ <sup>e,c</sup><br>Low    | -0.01 (-0.73 to 0.71)  | ⊕○○○ <sup>c,f</sup><br>Very Low |

|                              |                        |                               |                        |                               |                        |                                  |
|------------------------------|------------------------|-------------------------------|------------------------|-------------------------------|------------------------|----------------------------------|
| SA                           | -                      | -                             | 0.92 (0.10 to 1.75)    | ⊕⊕⊕○ <sup>e</sup><br>Moderate | 0.92 (0.10 to 1.75)    | ⊕⊕⊕○ <sup>e</sup><br>Moderate    |
| SMD                          | -0.21 (-0.78 to 0.35)  | ⊕⊕○○ <sup>a, c</sup><br>Low   | -                      | -                             | -0.21 (-0.78 to 0.35)  | ⊕○○○ <sup>c, f</sup><br>Very Low |
| <b>MINO gel vs.</b>          |                        |                               |                        |                               |                        |                                  |
| MINO microspheres            | -                      | -                             | -0.04 (-0.88 to 0.80)  | ⊕⊕○○ <sup>e, c</sup><br>Low   | -0.04 (-0.88 to 0.80)  | ⊕○○○ <sup>c, f</sup><br>Very Low |
| placebo                      | -                      | -                             | -0.77 (-1.62 to 0.08)  | ⊕⊕○○ <sup>e, c</sup><br>Low   | -0.77 (-1.62 to 0.08)  | ⊕○○○ <sup>c, f</sup><br>Very Low |
| SA                           | -                      | -                             | 0.16 (-0.78 to 1.10)   | ⊕⊕○○ <sup>e, c</sup><br>Low   | 0.16 (-0.78 to 1.10)   | ⊕○○○ <sup>c, f</sup><br>Very Low |
| SMD                          | -0.97 (-1.69 to -0.25) | ⊕⊕⊕○ <sup>a</sup><br>Moderate | -                      | -                             | -0.97 (-1.69 to -0.25) | ⊕⊕⊕○ <sup>e</sup><br>Moderate    |
| <b>MINO microspheres vs.</b> |                        |                               |                        |                               |                        |                                  |
| placebo                      | -                      | -                             | -0.73 (-1.35 to -0.11) | ⊕⊕⊕○ <sup>e</sup><br>Moderate | -0.73 (-1.35 to -0.11) | ⊕⊕⊕○ <sup>e</sup><br>Moderate    |
| SA                           | -                      | -                             | 0.20 (-0.53 to 0.94)   | ⊕⊕○○ <sup>e, c</sup><br>Low   | 0.20 (-0.53 to 0.94)   | ⊕○○○ <sup>c, f</sup><br>Very Low |
| SMD                          | -0.93 (-1.35 to -0.51) | ⊕⊕⊕○ <sup>a</sup><br>Moderate | -                      | -                             | -0.93 (-1.35 to -0.51) | ⊕⊕⊕○ <sup>e</sup><br>Moderate    |
| <b>Placebo vs.</b>           |                        |                               |                        |                               |                        |                                  |
| SA                           | 0.93 (0.53 to 1.33)    | ⊕⊕⊕○ <sup>a</sup><br>Moderate | -                      | -                             | 0.93 (0.53 to 1.33)    | ⊕⊕⊕○ <sup>e</sup><br>Moderate    |
| SMD                          | -0.69 (-1.47 to 0.09)  | ⊕⊕○○ <sup>a, c</sup><br>Low   | 0.04 (-0.51 to 0.59)   | ⊕⊕○○ <sup>e, c</sup><br>Low   | -0.20 (-0.65 to 0.25)  | ⊕○○○ <sup>c, f</sup><br>Very Low |
| <b>SA vs. SMD</b>            | -                      | -                             | -1.13 (-1.74 to -0.53) | ⊕⊕⊕○ <sup>e</sup><br>Moderate | -1.13 (-1.74 to -0.53) | ⊕⊕⊕○ <sup>e</sup><br>Moderate    |

<sup>a</sup> Limitations (risk of bias). <sup>b</sup> Inconsistency. <sup>c</sup> Imprecision. <sup>d</sup> Severe imprecision. <sup>e</sup> Contributing evidence of moderate quality. <sup>f</sup> Contributing evidence of low or very low quality. <sup>g</sup> Incoherence

Mean differences (95% CIs) and certainty of evidence for PPD changes in parallel design

| Comparisons | GRADE                    |                       |                          |                       |                          |                       |
|-------------|--------------------------|-----------------------|--------------------------|-----------------------|--------------------------|-----------------------|
|             | Direct evidence          |                       | Indirect evidence        |                       | Network meta-analysis    |                       |
|             | Mean difference (95% CI) | Certainty of evidence | Mean difference (95% CI) | Certainty of evidence | Mean difference (95% CI) | Certainty of evidence |
|             |                          |                       |                          |                       |                          |                       |

| <b>aPDT MB 1% vs.</b> |                        |                            |                        |                               |                        |                                 |
|-----------------------|------------------------|----------------------------|------------------------|-------------------------------|------------------------|---------------------------------|
| aPDT PC               | -                      | -                          | -0.62 (-1.23 to 0.00)  | ⊕⊕○○ <sup>e,c</sup><br>Low    | -0.62 (-1.23 to 0.00)  | ⊕○○○ <sup>c,f</sup><br>Very Low |
| CHX chip              | -                      | -                          | -0.70 (-1.41 to 0.00)  | ⊕⊕○○ <sup>e,c</sup><br>Low    | -0.70 (-1.41 to 0.00)  | ⊕○○○ <sup>c,f</sup><br>Very Low |
| CHX xanthan           | -                      | -                          | -0.38 (-1.07 to 0.32)  | ⊕⊕○○ <sup>e,c</sup><br>Low    | -0.38 (-1.07 to 0.32)  | ⊕○○○ <sup>c,f</sup><br>Very Low |
| DH                    | -                      | -                          | 0.21 (-0.51 to 0.94)   | ⊕⊕○○ <sup>e,c</sup><br>Low    | 0.21 (-0.51 to 0.94)   | ⊕○○○ <sup>c,f</sup><br>Very Low |
| MINO gel              | -                      | -                          | -0.02 (-0.66 to 0.62)  | ⊕⊕○○ <sup>e,c</sup><br>Low    | -0.02 (-0.66 to 0.62)  | ⊕○○○ <sup>c,f</sup><br>Very Low |
| MINO microspheres     | -                      | -                          | -0.43 (-0.94 to 0.08)  | ⊕⊕○○ <sup>e,c</sup><br>Low    | -0.43 (-0.94 to 0.08)  | ⊕○○○ <sup>c,f</sup><br>Very Low |
| PI 10%                | -                      | -                          | -0.77 (-1.49 to -0.05) | ⊕⊕⊕○ <sup>e</sup><br>Moderate | -0.77 (-1.49 to -0.05) | ⊕⊕⊕○ <sup>e</sup><br>Moderate   |
| placebo               | -0.09 (-1.07 to 0.89)  | ⊕⊕○○ <sup>a,c</sup><br>Low | -0.67 (-1.25 to -0.09) | ⊕⊕⊕○ <sup>e</sup><br>Moderate | -0.52 (-1.02 to -0.02) | ⊕⊕⊕○ <sup>e</sup><br>Moderate   |
| SMD                   | -0.80 (-1.30 to -0.30) | ⊕⊕○○ <sup>a,c</sup><br>Low | -0.22 (-1.25 to 0.80)  | ⊕⊕○○ <sup>e,c</sup><br>Low    | -0.69 (-1.14 to -0.24) | ⊕⊕⊕○ <sup>e</sup><br>Moderate   |
| TC                    | -                      | -                          | -0.82 (-1.83 to 0.18)  | ⊕⊕○○ <sup>e,c</sup><br>Low    | -0.82 (-1.83 to 0.18)  | ⊕○○○ <sup>c,f</sup><br>Very Low |
| <b>aPDT PC vs.</b>    |                        |                            |                        |                               |                        |                                 |
| CHX chip              | -                      | -                          | -0.09 (-0.77 to 0.59)  | ⊕⊕○○ <sup>e,c</sup><br>Low    | -0.09 (-0.77 to 0.59)  | ⊕○○○ <sup>c,f</sup><br>Very Low |
| CHX xanthan           | -                      | -                          | 0.24 (-0.46 to 0.93)   | ⊕⊕○○ <sup>e,c</sup><br>Low    | 0.24 (-0.46 to 0.93)   | ⊕○○○ <sup>c,f</sup><br>Very Low |
| DH                    | -                      | -                          | 0.83 (0.10 to 1.55)    | ⊕⊕⊕○ <sup>e</sup><br>Moderate | 0.83 (0.10 to 1.55)    | ⊕⊕⊕○ <sup>e</sup><br>Moderate   |
| MINO gel              | -                      | -                          | 0.60 (-0.01 to 1.21)   | ⊕⊕○○ <sup>e,c</sup><br>Low    | 0.60 (-0.01 to 1.21)   | ⊕○○○ <sup>c,f</sup><br>Very Low |
| MINO microspheres     | -                      | -                          | 0.19 (-0.31 to 0.68)   | ⊕⊕○○ <sup>e,c</sup><br>Low    | 0.19 (-0.31 to 0.68)   | ⊕○○○ <sup>c,f</sup><br>Very Low |
| PI 10%                | -                      | -                          | -0.15 (-0.85 to 0.55)  | ⊕⊕○○ <sup>e,c</sup><br>Low    | -0.15 (-0.85 to 0.55)  | ⊕○○○ <sup>c,f</sup><br>Very Low |
| placebo               | -                      | -                          | 0.10 (-0.40 to 0.60)   | ⊕⊕○○ <sup>e,c</sup><br>Low    | 0.10 (-0.40 to 0.60)   | ⊕○○○ <sup>c,f</sup><br>Very Low |

|                        |                       |                            |                       |                                 |                       |                                 |
|------------------------|-----------------------|----------------------------|-----------------------|---------------------------------|-----------------------|---------------------------------|
| SMD                    | -0.07 (-0.49 to 0.34) | ⊕⊕○○ <sup>a,c</sup><br>Low | -                     | -                               | -0.07 (-0.49 to 0.34) | ⊕○○○ <sup>c,f</sup><br>Very Low |
| TC                     | -                     | -                          | -0.21 (-1.20 to 0.78) | ⊕⊕○○ <sup>e,c</sup><br>Low      | -0.21 (-1.20 to 0.78) | ⊕○○○ <sup>c,f</sup><br>Very Low |
| <b>CHX chip vs.</b>    |                       |                            |                       |                                 |                       |                                 |
| CHX xanthan            | -                     | -                          | 0.33 (-0.45 to 1.10)  | ⊕⊕○○ <sup>e,c</sup><br>Low      | 0.33 (-0.45 to 1.10)  | ⊕○○○ <sup>c,f</sup><br>Very Low |
| DH                     | -                     | -                          | 0.92 (0.11 to 1.72)   | ⊕⊕⊕○ <sup>e</sup><br>Moderate   | 0.92 (0.11 to 1.72)   | ⊕⊕⊕○ <sup>e</sup><br>Moderate   |
| MINO gel               | -                     | -                          | 0.69 (-0.02 to 1.39)  | ⊕⊕○○ <sup>e,c</sup><br>Low      | 0.69 (-0.02 to 1.39)  | ⊕○○○ <sup>c,f</sup><br>Very Low |
| MINO microspheres      | -                     | -                          | 0.27 (-0.33 to 0.88)  | ⊕⊕○○ <sup>e,c</sup><br>Low      | 0.27 (-0.33 to 0.88)  | ⊕○○○ <sup>c,f</sup><br>Very Low |
| PI 10%                 | -                     | -                          | -0.06 (-0.84 to 0.71) | ⊕⊕○○ <sup>e,c</sup><br>Low      | -0.06 (-0.84 to 0.71) | ⊕○○○ <sup>c,f</sup><br>Very Low |
| placebo                | -                     | -                          | 0.19 (-0.42 to 0.79)  | ⊕⊕○○ <sup>e,c</sup><br>Low      | 0.19 (-0.42 to 0.79)  | ⊕○○○ <sup>c,f</sup><br>Very Low |
| SMD                    | 0.02 (-0.52 to 0.55)  | ⊕⊕○○ <sup>a,c</sup><br>Low | -                     | -                               | 0.02 (-0.52 to 0.55)  | ⊕○○○ <sup>c,f</sup><br>Very Low |
| TC                     | -0.56 (-1.69 to 0.57) | ⊕⊕○○ <sup>a,c</sup><br>Low | 0.99 (-0.80 to 2.79)  | ⊕○○○ <sup>d,f</sup><br>Very Low | -0.12 (-1.08 to 0.84) | ⊕○○○ <sup>c,f</sup><br>Very Low |
| <b>CHX xanthan vs.</b> |                       |                            |                       |                                 |                       |                                 |
| DH                     | -                     | -                          | 0.59 (-0.13 to 1.31)  | ⊕⊕○○ <sup>e,c</sup><br>Low      | 0.59 (-0.13 to 1.31)  | ⊕○○○ <sup>c,f</sup><br>Very Low |
| MINO gel               | -                     | -                          | 0.36 (-0.36 to 1.08)  | ⊕⊕○○ <sup>e,c</sup><br>Low      | 0.36 (-0.36 to 1.08)  | ⊕○○○ <sup>c,f</sup><br>Very Low |
| MINO microspheres      | -                     | -                          | -0.05 (-0.61 to 0.51) | ⊕⊕○○ <sup>e,c</sup><br>Low      | -0.05 (-0.61 to 0.51) | ⊕○○○ <sup>c,f</sup><br>Very Low |
| PI 10%                 | -                     | -                          | -0.39 (-1.18 to 0.40) | ⊕⊕○○ <sup>e,c</sup><br>Low      | -0.39 (-1.18 to 0.40) | ⊕○○○ <sup>c,f</sup><br>Very Low |
| placebo                | -0.14 (-0.62 to 0.34) | ⊕⊕○○ <sup>a,c</sup><br>Low | -                     | -                               | -0.14 (-0.62 to 0.34) | ⊕○○○ <sup>c,f</sup><br>Very Low |
| SMD                    | -                     | -                          | -0.31 (-0.87 to 0.25) | ⊕⊕○○ <sup>e,c</sup><br>Low      | -0.31 (-0.87 to 0.25) | ⊕○○○ <sup>c,f</sup><br>Very Low |
| TC                     | -                     | -                          | -0.45 (-1.50 to 0.61) | ⊕⊕○○ <sup>e,c</sup><br>Low      | -0.45 (-1.50 to 0.61) | ⊕○○○ <sup>c,f</sup><br>Very Low |
| <b>DH vs.</b>          |                       |                            |                       |                                 |                       |                                 |

|                              |                        |                               |                        |                                 |                        |                                 |
|------------------------------|------------------------|-------------------------------|------------------------|---------------------------------|------------------------|---------------------------------|
| MINO gel                     | -                      | -                             | -0.23 (-0.98 to 0.52)  | ⊕⊕○○ <sup>e,c</sup><br>Low      | -0.23 (-0.98 to 0.52)  | ⊕○○○ <sup>c,f</sup><br>Very Low |
| MINO microspheres            | -                      | -                             | -0.64 (-1.24 to -0.04) | ⊕⊕⊕○ <sup>e</sup><br>Moderate   | -0.64 (-1.24 to -0.04) | ⊕⊕⊕○ <sup>e</sup><br>Moderate   |
| PI 10%                       | -                      | -                             | -0.98 (-1.80 to -0.16) | ⊕⊕⊕○ <sup>e</sup><br>Moderate   | -0.98 (-1.80 to -0.16) | ⊕⊕⊕○ <sup>e</sup><br>Moderate   |
| placebo                      | -0.73 (-1.26 to -0.20) | ⊕⊕⊕○ <sup>a</sup><br>Moderate | -                      | -                               | -0.73 (-1.26 to -0.20) | ⊕⊕⊕○ <sup>e</sup><br>Moderate   |
| SMD                          | -                      | -                             | -0.90 (-1.50 to -0.30) | ⊕⊕⊕○ <sup>e</sup><br>Moderate   | -0.90 (-1.50 to -0.30) | ⊕⊕⊕○ <sup>e</sup><br>Moderate   |
| TC                           | -                      | -                             | -1.04 (-2.11 to 0.04)  | ⊕○○○ <sup>d,f</sup><br>Very Low | -1.04 (-2.11 to 0.04)  | ⊕○○○ <sup>c,f</sup><br>Very Low |
| <b>MINO gel vs.</b>          |                        |                               |                        |                                 |                        |                                 |
| MINO microspheres            | -                      | -                             | -0.41 (-0.94 to 0.11)  | ⊕⊕○○ <sup>e,c</sup><br>Low      | -0.41 (-0.94 to 0.11)  | ⊕○○○ <sup>c,f</sup><br>Very Low |
| PI 10%                       | -                      | -                             | -0.75 (-1.47 to -0.03) | ⊕⊕⊕○ <sup>e</sup><br>Moderate   | -0.75 (-1.47 to -0.03) | ⊕⊕⊕○ <sup>e</sup><br>Moderate   |
| placebo                      | -                      | -                             | -0.50 (-1.03 to 0.03)  | ⊕⊕○○ <sup>e,c</sup><br>Low      | -0.50 (-1.03 to 0.03)  | ⊕○○○ <sup>c,f</sup><br>Very Low |
| SMD                          | -0.67 (-1.12 to -0.22) | ⊕⊕⊕○ <sup>a</sup><br>Moderate | -                      | -                               | -0.67 (-1.12 to -0.22) | ⊕⊕⊕○ <sup>e</sup><br>Moderate   |
| TC                           | -                      | -                             | -0.81 (-1.81 to 0.20)  | ⊕⊕○○ <sup>e,c</sup><br>Low      | -0.81 (-1.81 to 0.20)  | ⊕○○○ <sup>c,f</sup><br>Very Low |
| <b>MINO microspheres vs.</b> |                        |                               |                        |                                 |                        |                                 |
| PI 10%                       | -                      | -                             | -0.34 (-0.96 to 0.28)  | ⊕⊕○○ <sup>e,c</sup><br>Low      | -0.34 (-0.96 to 0.28)  | ⊕○○○ <sup>c,f</sup><br>Very Low |
| placebo                      | -0.11 (-0.40 to 0.19)  | ⊕⊕○○ <sup>a,c</sup><br>Low    | 0.18 (-0.98 to 1.33)   | ⊕⊕○○ <sup>e,c</sup><br>Low      | -0.09 (-0.37 to 0.20)  | ⊕⊕○○ <sup>e,c</sup><br>Low      |
| SMD                          | -0.24 (-0.51 to 0.03)  | ⊕⊕○○ <sup>a,c</sup><br>Low    | -1.39 (-3.66 to 0.87)  | ⊕○○○ <sup>d,f</sup><br>Very Low | -0.26 (-0.53 to 0.01)  | ⊕○○○ <sup>c,f</sup><br>Very Low |
| TC                           | -                      | -                             | -0.39 (-1.33 to 0.54)  | ⊕⊕○○ <sup>e,c</sup><br>Low      | -0.39 (-1.33 to 0.54)  | ⊕○○○ <sup>c,f</sup><br>Very Low |
| <b>PI 10% vs.</b>            |                        |                               |                        |                                 |                        |                                 |
| placebo                      | -                      | -                             | 0.25 (-0.38 to 0.88)   | ⊕⊕○○ <sup>e,c</sup><br>Low      | 0.25 (-0.38 to 0.88)   | ⊕○○○ <sup>c,f</sup><br>Very Low |
| SMD                          | -0.08 (-0.64 to 0.48)  | ⊕⊕○○ <sup>a,c</sup><br>Low    | -                      | -                               | 0.08 (-0.48 to 0.64)   | ⊕○○○ <sup>c,f</sup><br>Very Low |

|                    |                       |                            |                       |                                 |                       |                                 |
|--------------------|-----------------------|----------------------------|-----------------------|---------------------------------|-----------------------|---------------------------------|
| TC                 | -                     | -                          | -0.06 (-1.11 to 1.00) | ⊕⊕○○ <sup>e,c</sup><br>Low      | -0.06 (-1.11 to 1.00) | ⊕○○○ <sup>c,f</sup><br>Very Low |
| <b>Placebo vs.</b> |                       |                            |                       |                                 |                       |                                 |
| SMD                | -0.13 (-0.42 to 0.16) | ⊕⊕○○ <sup>a,c</sup><br>Low | -0.53 (-1.40 to 0.34) | ⊕⊕○○ <sup>e,c</sup><br>Low      | -0.17 (-0.45 to 0.11) | ⊕○○○ <sup>c,f</sup><br>Very Low |
| TC                 | -                     | -                          | -0.31 (-1.25 to 0.63) | ⊕⊕○○ <sup>e,c</sup><br>Low      | -0.31 (-1.25 to 0.63) | ⊕○○○ <sup>c,f</sup><br>Very Low |
| <b>TC vs. SMD</b>  | 0.06 (-0.88 to 1.00)  | ⊕⊕○○ <sup>a,c</sup><br>Low | 2.33 (-0.80 to 5.46)  | ⊕○○○ <sup>d,f</sup><br>Very Low | 0.14 (-0.76 to 1.03)  | ⊕○○○ <sup>c,f</sup><br>Very Low |

<sup>a</sup> Limitations (risk of bias). <sup>b</sup> Inconsistency. <sup>c</sup> Imprecision. <sup>d</sup> Severe imprecision. <sup>e</sup> Contributing evidence of moderate quality. <sup>f</sup> Contributing evidence of low or very low quality. <sup>g</sup> Incoherence

#### Mean differences (95% CIs) and certainty of evidence for CAL changes in split-mouth design

| Comparisons         | GRADE                    |                       |                          |                               |                          |                                 |
|---------------------|--------------------------|-----------------------|--------------------------|-------------------------------|--------------------------|---------------------------------|
|                     | Direct evidence          |                       | Indirect evidence        |                               | Network meta-analysis    |                                 |
|                     | Mean difference (95% CI) | Certainty of evidence | Mean difference (95% CI) | Certainty of evidence         | Mean difference (95% CI) | Certainty of evidence           |
| <b>aPDT ICG vs.</b> |                          |                       |                          |                               |                          |                                 |
| aPDT MB 0.005%      | -                        | -                     | -0.35 (-0.90 to 0.19)    | ⊕⊕○○ <sup>e,c</sup><br>Low    | -0.35 (-0.90 to 0.19)    | ⊕○○○ <sup>c,f</sup><br>Very Low |
| aPDT MB 1%          | -                        | -                     | -0.94 (-1.42 to -0.46)   | ⊕⊕⊕○ <sup>e</sup><br>Moderate | -0.94 (-1.42 to -0.46)   | ⊕⊕⊕○ <sup>e</sup><br>Moderate   |
| aPDT TBO            | -                        | -                     | -1.32 (-2.54 to -0.11)   | ⊕⊕⊕○ <sup>e</sup><br>Moderate | -1.32 (-2.54 to -0.11)   | ⊕⊕⊕○ <sup>e</sup><br>Moderate   |
| CHX chip            | -                        | -                     | -0.76 (-1.28 to -0.24)   | ⊕⊕⊕○ <sup>e</sup><br>Moderate | -0.76 (-1.28 to -0.24)   | ⊕⊕⊕○ <sup>e</sup><br>Moderate   |
| CHX xanthan         | -                        | -                     | -1.42 (-2.87 to 0.03)    | ⊕⊕○○ <sup>e,c</sup><br>Low    | -1.42 (-2.87 to 0.03)    | ⊕○○○ <sup>c,f</sup><br>Very Low |
| DH                  | -                        | -                     | -0.73 (-1.31 to -0.15)   | ⊕⊕⊕○ <sup>e</sup><br>Moderate | -0.73 (-1.31 to -0.15)   | ⊕⊕⊕○ <sup>e</sup><br>Moderate   |
| MET                 | -                        | -                     | -0.36 (-1.18 to 0.47)    | ⊕⊕○○ <sup>e,c</sup><br>Low    | -0.36 (-1.18 to 0.47)    | ⊕○○○ <sup>c,f</sup><br>Very Low |
| MINO gel            | -                        | -                     | -0.34 (-1.52 to 0.84)    | ⊕⊕○○ <sup>e,c</sup><br>Low    | -0.34 (-1.52 to 0.84)    | ⊕○○○ <sup>c,f</sup><br>Very Low |



|                           |                        |                               |                              |                               |                              |                                 |
|---------------------------|------------------------|-------------------------------|------------------------------|-------------------------------|------------------------------|---------------------------------|
| MINO microspheres         | -                      | -                             | -0.21 (-0.73 to 0.31)        | ⊕⊕○○ <sup>e,c</sup><br>Low    | -0.21 (-0.73 to 0.31)        | ⊕○○○ <sup>c,f</sup><br>Very Low |
| placebo                   | -                      | -                             | -0.97 (-1.59 to -0.34)       | ⊕⊕⊕○ <sup>e</sup><br>Moderate | -0.97 (-1.59 to -0.34)       | ⊕⊕⊕○ <sup>e</sup><br>Moderate   |
| <hr/>                     |                        |                               |                              |                               |                              |                                 |
| SA                        | -                      | -                             | <b>0.23 (- 0.41 to 0.88)</b> | ⊕⊕○○ <sup>e,c</sup><br>Low    | <b>0.23 (- 0.41 to 0.88)</b> | ⊕⊕○○ <sup>e,c</sup><br>Low      |
| SMD                       | -0.86 (-1.29 to -0.44) | ⊕⊕⊕○ <sup>a</sup><br>Moderate | -                            | -                             | -0.86 (-1.29 to -0.44)       | ⊕⊕⊕○ <sup>e</sup><br>Moderate   |
| <b>aPDT MB 0.005% vs.</b> |                        |                               |                              |                               |                              |                                 |
| aPDT MB 1%                | -                      | -                             | -0.58 (-0.99 to -0.18)       | ⊕⊕⊕○ <sup>e</sup><br>Moderate | -0.58 (-0.99 to -0.18)       | ⊕⊕○○ <sup>e,c</sup><br>Low      |
| aPDT TBO                  | -                      | -                             | -0.97 (-2.15 to 0.22)        | ⊕⊕○○ <sup>e,c</sup><br>Low    | -0.97 (-2.15 to 0.22)        | ⊕⊕○○ <sup>e,c</sup><br>Low      |
| CHX chip                  | -                      | -                             | -0.41 (-0.87 to 0.05)        | ⊕⊕○○ <sup>e,c</sup><br>Low    | -0.41 (-0.87 to 0.05)        | ⊕○○○ <sup>c,f</sup><br>Very Low |
| CHX xanthan               | -                      | -                             | -1.07 (-2.49 to 0.36)        | ⊕⊕○○ <sup>e,c</sup><br>Low    | -1.07 (-2.49 to 0.36)        | ⊕○○○ <sup>c,f</sup><br>Very Low |
| DH                        | -                      | -                             | -0.37 (-0.90 to 0.15)        | ⊕⊕○○ <sup>e,c</sup><br>Low    | -0.37 (-0.90 to 0.15)        | ⊕○○○ <sup>c,f</sup><br>Very Low |
| MET                       | -                      | -                             | -0.00 (-0.79 to 0.78)        | ⊕⊕○○ <sup>e,c</sup><br>Low    | -0.00 (-0.79 to 0.78)        | ⊕○○○ <sup>c,f</sup><br>Very Low |
| MINO gel                  | -                      | -                             | 0.01 (-1.14 to 1.16)         | ⊕⊕○○ <sup>e,c</sup><br>Low    | 0.01 (-1.14 to 1.16)         | ⊕○○○ <sup>c,f</sup><br>Very Low |
| MINO microspheres         | -                      | -                             | 0.14 (- 0.32 to 0.60)        | ⊕⊕○○ <sup>e,c</sup><br>Low    | 0.14 (- 0.32 to 0.60)        | ⊕○○○ <sup>c,f</sup><br>Very Low |
| placebo                   | -0.50 (-0.86 to -0.14) | ⊕⊕⊕○ <sup>a</sup><br>Moderate | -0.60 (-1.20 to 0.01)        | ⊕⊕○○ <sup>e,c</sup><br>Low    | -0.61 (-1.16 to -0.06)       | ⊕⊕⊕○ <sup>e</sup><br>Moderate   |
| SA                        | -                      | -                             | 0.59 (0.02 to 1.16)          | ⊕⊕⊕○ <sup>e</sup><br>Moderate | 0.59 (0.02 to 1.16)          | ⊕⊕○○ <sup>e,c</sup><br>Low      |
| SMD                       | -0.70 (-2.02 to 0.62)  | ⊕⊕○○ <sup>a,c</sup><br>Low    | -0.60 (-2.01 to 0.80)        | ⊕⊕○○ <sup>e,c</sup><br>Low    | -0.51 (-0.85 to -0.16)       | ⊕⊕○○ <sup>e,c</sup><br>Low      |
| <b>aPDT MB 1% vs.</b>     |                        |                               |                              |                               |                              |                                 |
| aPDT TBO                  | -                      | -                             | -0.38 (-1.53 to 0.77)        | ⊕⊕○○ <sup>e,c</sup><br>Low    | -0.38 (-1.53 to 0.77)        | ⊕○○○ <sup>c,f</sup><br>Very Low |

|                     |                       |                             |                       |                                  |                       |                                  |
|---------------------|-----------------------|-----------------------------|-----------------------|----------------------------------|-----------------------|----------------------------------|
| CHX chip            | -                     | -                           | 0.18 (- 0.20 to 0.55) | ⊕⊕○○ <sup>e, c</sup><br>Low      | 0.18 (- 0.20 to 0.55) | ⊕○○○ <sup>c, f</sup><br>Very Low |
| CHX xanthan         | -                     | -                           | -0.48 (-1.89 to 0.92) | ⊕⊕○○ <sup>e, c</sup><br>Low      | -0.48 (-1.89 to 0.92) | ⊕○○○ <sup>c, f</sup><br>Very Low |
| DH                  | -                     | -                           | 0.21 (-0.24 to 0.66)  | ⊕⊕○○ <sup>e, c</sup><br>Low      | 0.21 (-0.24 to 0.66)  | ⊕○○○ <sup>c, f</sup><br>Very Low |
| MET                 | -                     | -                           | 0.58 (-0.16 to 1.32)  | ⊕⊕○○ <sup>e, c</sup><br>Low      | 0.58 (-0.16 to 1.32)  | ⊕○○○ <sup>c, f</sup><br>Very Low |
| MINO gel            | -                     | -                           | 0.60 (-0.52 to 1.72)  | ⊕⊕○○ <sup>e, c</sup><br>Low      | 0.60 (-0.52 to 1.72)  | ⊕○○○ <sup>c, f</sup><br>Very Low |
| MINO microspheres   | -                     | -                           | 0.73 (0.35 to 1.10)   | ⊕⊕⊕○ <sup>e</sup><br>Moderate    | 0.73 (0.35 to 1.10)   | ⊕⊕⊕○ <sup>e</sup><br>Moderate    |
| placebo             | 0.04 (-0.45 to 0.53)  | ⊕⊕○○ <sup>a, c</sup><br>Low | 0.01 (-0.89 to 0.90)  | ⊕⊕○○ <sup>e, c</sup><br>Low      | -0.03 (-0.46 to 0.40) | ⊕○○○ <sup>c, f</sup><br>Very Low |
| SA                  | -                     | -                           | 1.17 (-0.71 to 1.63)  | ⊕⊕○○ <sup>e, c</sup><br>Low      | 1.17 (-0.71 to 1.63)  | ⊕○○○ <sup>c, f</sup><br>Very Low |
| SMD                 | -0.08 (-0.30 to 0.14) | ⊕⊕○○ <sup>a, c</sup><br>Low | 0.03 (-0.96 to 1.03)  | ⊕⊕○○ <sup>e, c</sup><br>Low      | 0.08 (-0.14 to 0.30)  | ⊕○○○ <sup>c, f</sup><br>Very Low |
| <b>aPDT TBO vs.</b> |                       |                             |                       |                                  |                       |                                  |
| CHX chip            | -                     | -                           | 0.56 (- 0.62 to 1.74) | ⊕⊕○○ <sup>e, c</sup><br>Low      | 0.56 (- 0.62 to 1.74) | ⊕○○○ <sup>c, f</sup><br>Very Low |
| CHX xanthan         | -                     | -                           | -0.10 (-1.89 to 1.69) | ⊕⊕○○ <sup>e, c</sup><br>Low      | -0.10 (-1.89 to 1.69) | ⊕○○○ <sup>c, f</sup><br>Very Low |
| DH                  | -                     | -                           | 0.60 (- 0.61 to 1.80) | ⊕⊕○○ <sup>e, c</sup><br>Low      | 0.60 (- 0.61 to 1.80) | ⊕○○○ <sup>c, f</sup><br>Very Low |
| MET                 | -                     | -                           | 0.96 (-0.38 to 2.30)  | ⊕⊕○○ <sup>e, c</sup><br>Low      | 0.96 (-0.38 to 2.30)  | ⊕○○○ <sup>c, f</sup><br>Very Low |
| MINO gel            | -                     | -                           | 0.98 (- 0.60 to 2.56) | ⊕⊕○○ <sup>e, c</sup><br>Low      | 0.98 (- 0.60 to 2.56) | ⊕○○○ <sup>c, f</sup><br>Very Low |
| MINO microspheres   | -                     | -                           | 1.11 (-0.07 to 2.29)  | ⊕⊕○○ <sup>e, c</sup><br>Low      | 1.11 (-0.07 to 2.29)  | ⊕○○○ <sup>c, f</sup><br>Very Low |
| placebo             | -0.43 (-1.77 to 0.91) | ⊕⊕○○ <sup>a, c</sup><br>Low | 0.12 (-2.22 to 2.47)  | ⊕○○○ <sup>d, f</sup><br>Very Low | 0.35 (-0.81 to 1.52)  | ⊕○○○ <sup>c, f</sup><br>Very Low |
| SA                  | -                     | -                           | 1.55 (0.38 to 2.73)   | ⊕⊕⊕○ <sup>e</sup><br>Moderate    | 1.55 (0.38 to 2.73)   | ⊕⊕⊕○ <sup>e</sup><br>Moderate    |
| SMD                 | -0.42 (-1.61 to 0.77) | ⊕⊕○○ <sup>a, c</sup><br>Low | 0.88 (-2.93 to 4.68)  | ⊕○○○ <sup>d, f</sup><br>Very Low | 0.46 (-0.68 to 1.60)  | ⊕○○○ <sup>c, f</sup><br>Very Low |

| <b>CHX chip vs.</b>    |                       |                            |                       |                               |                       |                                 |
|------------------------|-----------------------|----------------------------|-----------------------|-------------------------------|-----------------------|---------------------------------|
| CHX xanthan            | -                     | -                          | -0.66 (-2.08 to 0.76) | ⊕⊕○○ <sup>e,c</sup><br>Low    | -0.66 (-2.08 to 0.76) | ⊕○○○ <sup>c,f</sup><br>Very Low |
| DH                     | -                     | -                          | 0.04 (-0.46 to 0.53)  | ⊕⊕○○ <sup>e,c</sup><br>Low    | 0.04 (-0.46 to 0.53)  | ⊕○○○ <sup>c,f</sup><br>Very Low |
| MET                    | -                     | -                          | 0.40 (-0.37 to 1.17)  | ⊕⊕○○ <sup>e,c</sup><br>Low    | 0.40 (-0.37 to 1.17)  | ⊕○○○ <sup>c,f</sup><br>Very Low |
| MINO gel               | -                     | -                          | 0.42 (-0.72 to 1.56)  | ⊕⊕○○ <sup>e,c</sup><br>Low    | 0.42 (-0.72 to 1.56)  | ⊕○○○ <sup>c,f</sup><br>Very Low |
| MINO microspheres      | -                     | -                          | 0.55 (0.12 to 0.98)   | ⊕⊕⊕○ <sup>e</sup><br>Moderate | 0.55 (0.12 to 0.98)   | ⊕⊕⊕○ <sup>e</sup><br>Moderate   |
| placebo                | -                     | -                          | -0.21 (-0.76 to 0.34) | ⊕⊕○○ <sup>e,c</sup><br>Low    | -0.21 (-0.76 to 0.34) | ⊕○○○ <sup>c,f</sup><br>Very Low |
| SA                     | -                     | -                          | 0.99 (0.42 to 1.56)   | ⊕⊕⊕○ <sup>e</sup><br>Moderate | 0.99 (0.42 to 1.56)   | ⊕⊕⊕○ <sup>e</sup><br>Moderate   |
| SMD                    | -0.10 (-0.40 to 0.20) | ⊕⊕○○ <sup>a,c</sup><br>Low | -                     | -                             | -0.10 (-0.40 to 0.20) | ⊕○○○ <sup>c,f</sup><br>Very Low |
| <b>CHX xanthan vs.</b> |                       |                            |                       |                               |                       |                                 |
| DH                     | -                     | -                          | 0.69 (-0.75 to 2.14)  | ⊕⊕○○ <sup>e,c</sup><br>Low    | 0.69 (-0.75 to 2.14)  | ⊕○○○ <sup>c,f</sup><br>Very Low |
| MET                    | -                     | -                          | 1.06 (-0.49 to 2.62)  | ⊕⊕○○ <sup>e,c</sup><br>Low    | 1.06 (-0.49 to 2.62)  | ⊕○○○ <sup>c,f</sup><br>Very Low |
| MINO gel               | -                     | -                          | 1.08 (-0.69 to 2.85)  | ⊕⊕○○ <sup>e,c</sup><br>Low    | 1.08 (-0.69 to 2.85)  | ⊕○○○ <sup>c,f</sup><br>Very Low |
| MINO microspheres      | -                     | -                          | 1.21 (-0.21 to 2.63)  | ⊕⊕○○ <sup>e,c</sup><br>Low    | 1.21 (-0.21 to 2.63)  | ⊕○○○ <sup>c,f</sup><br>Very Low |
| placebo                | -                     | -                          | 0.45 (-1.01 to 1.91)  | ⊕⊕○○ <sup>e,c</sup><br>Low    | 0.45 (-1.01 to 1.91)  | ⊕○○○ <sup>c,f</sup><br>Very Low |
| SA                     | -                     | -                          | 1.65 (0.18 to 3.12)   | ⊕⊕⊕○ <sup>e</sup><br>Moderate | 1.65 (0.18 to 3.12)   | ⊕⊕⊕○ <sup>e</sup><br>Moderate   |
| SMD                    | -0.56 (-1.95 to 0.83) | ⊕⊕○○ <sup>a,c</sup><br>Low | -                     | -                             | 0.56 (-0.83 to 1.95)  | ⊕○○○ <sup>c,f</sup><br>Very Low |
| <b>DH vs.</b>          |                       |                            |                       |                               |                       |                                 |
| MET                    | -                     | -                          | 0.37 (-0.44 to 1.18)  | ⊕⊕○○ <sup>e,c</sup><br>Low    | 0.37 (-0.44 to 1.18)  | ⊕○○○ <sup>c,f</sup><br>Very Low |
| MINO gel               | -                     | -                          | 0.38 (-0.78 to 1.55)  | ⊕⊕○○ <sup>e,c</sup><br>Low    | 0.38 (-0.78 to 1.55)  | ⊕○○○ <sup>c,f</sup><br>Very Low |

|                              |                        |                               |                        |                               |                        |                                 |
|------------------------------|------------------------|-------------------------------|------------------------|-------------------------------|------------------------|---------------------------------|
| MINO microspheres            | -                      | -                             | 0.51 (0.02 to 1.01)    | ⊕⊕⊕○ <sup>e</sup><br>Moderate | 0.51 (0.02 to 1.01)    | ⊕⊕⊕○ <sup>e</sup><br>Moderate   |
| placebo                      | -                      | -                             | -0.24 (-0.85 to 0.36)  | ⊕⊕○○ <sup>e,c</sup><br>Low    | -0.24 (-0.85 to 0.36)  | ⊕○○○ <sup>c,f</sup><br>Very Low |
| SA                           | -                      | -                             | 0.96 (0.33 to 1.58)    | ⊕⊕⊕○ <sup>e</sup><br>Moderate | 0.96 (0.33 to 1.58)    | ⊕⊕⊕○ <sup>e</sup><br>Moderate   |
| SMD                          | -0.13 (-0.53 to 0.26)  | ⊕⊕○○ <sup>a,c</sup><br>Low    | -                      | -                             | -0.14 (-0.53 to 0.26)  | ⊕○○○ <sup>c,f</sup><br>Very Low |
| <b>MET vs.</b>               |                        |                               |                        |                               |                        |                                 |
| MINO gel                     | -                      | -                             | 0.02 (-1.29 to 1.32)   | ⊕⊕○○ <sup>e,c</sup><br>Low    | 0.02 (-1.29 to 1.32)   | ⊕○○○ <sup>c,f</sup><br>Very Low |
| MINO microspheres            | -                      | -                             | 0.15 (-0.62 to 0.92)   | ⊕⊕○○ <sup>e,c</sup><br>Low    | 0.15 (-0.62 to 0.92)   | ⊕○○○ <sup>c,f</sup><br>Very Low |
| placebo                      | -                      | -                             | -0.61 (-1.45 to 0.23)  | ⊕⊕○○ <sup>e,c</sup><br>Low    | -0.61 (-1.45 to 0.23)  | ⊕○○○ <sup>c,f</sup><br>Very Low |
| SA                           | -                      | -                             | 0.59 (-0.27 to 1.45)   | ⊕⊕○○ <sup>e,c</sup><br>Low    | 0.59 (-0.27 to 1.45)   | ⊕○○○ <sup>c,f</sup><br>Very Low |
| SMD                          | -0.50 (-1.21 to 0.20)  | ⊕⊕○○ <sup>a,c</sup><br>Low    | -                      | -                             | -0.50 (-1.21 to 0.20)  | ⊕○○○ <sup>c,f</sup><br>Very Low |
| <b>MINO gel vs.</b>          |                        |                               |                        |                               |                        |                                 |
| MINO microspheres            | -                      | -                             | 0.13 (-1.01 to 1.27)   | ⊕⊕○○ <sup>e,c</sup><br>Low    | 0.13 (-1.01 to 1.27)   | ⊕○○○ <sup>c,f</sup><br>Very Low |
| placebo                      | -                      | -                             | -0.63 (-1.82 to 0.56)  | ⊕⊕○○ <sup>e,c</sup><br>Low    | -0.63 (-1.82 to 0.56)  | ⊕○○○ <sup>c,f</sup><br>Very Low |
| SA                           | -                      | -                             | 0.57 (-0.63 to 1.77)   | ⊕⊕○○ <sup>e,c</sup><br>Low    | 0.57 (-0.63 to 1.77)   | ⊕○○○ <sup>c,f</sup><br>Very Low |
| SMD                          | -0.52 (-1.62 to 0.58)  | ⊕⊕○○ <sup>a,c</sup><br>Low    | -                      | -                             | -0.52 (-1.62 to 0.58)  | ⊕○○○ <sup>c,f</sup><br>Very Low |
| <b>MINO microspheres vs.</b> |                        |                               |                        |                               |                        |                                 |
| placebo                      | -                      | -                             | -0.76 (-1.31 to -0.21) | ⊕⊕⊕○ <sup>e</sup><br>Moderate | -0.76 (-1.31 to -0.21) | ⊕⊕⊕○ <sup>e</sup><br>Moderate   |
| SA                           | -                      | -                             | 0.44 (-0.13 to 1.01)   | ⊕⊕○○ <sup>e,c</sup><br>Low    | 0.44 (-0.13 to 1.01)   | ⊕○○○ <sup>c,f</sup><br>Very Low |
| SMD                          | -0.65 (-0.95 to -0.35) | ⊕⊕⊕○ <sup>a</sup><br>Moderate | -                      | -                             | -0.65 (-0.95 to -0.35) | ⊕⊕⊕○ <sup>e</sup><br>Moderate   |
| <b>Placebo vs.</b>           |                        |                               |                        |                               |                        |                                 |

|                   |                        |                               |                        |                               |                        |                                 |
|-------------------|------------------------|-------------------------------|------------------------|-------------------------------|------------------------|---------------------------------|
| SA                | -1.20 (-1.35 to -1.05) | ⊕⊕⊕○ <sup>a</sup><br>Moderate | -                      | -                             | 1.20 (1.05 to 1.35)    | ⊕⊕⊕○ <sup>e</sup><br>Moderate   |
| SMD               | 0.01 (-1.11 to 1.13)   | ⊕⊕○○ <sup>a,c</sup><br>Low    | 0.13 (-0.37 to 0.63)   | ⊕⊕○○ <sup>e,c</sup><br>Low    | 0.11 (-0.35 to 0.57)   | ⊕○○○ <sup>c,f</sup><br>Very Low |
| <b>SA vs. SMD</b> | -                      | -                             | -1.09 (-1.58 to -0.61) | ⊕⊕⊕○ <sup>e</sup><br>Moderate | -1.09 (-1.58 to -0.61) | ⊕⊕⊕○ <sup>e</sup><br>Moderate   |

<sup>a</sup> Limitations (risk of bias). <sup>b</sup> Inconsistency. <sup>c</sup> Imprecision. <sup>d</sup> Severe imprecision. <sup>e</sup> Contributing evidence of moderate quality. <sup>f</sup> Contributing evidence of low or very low quality. <sup>g</sup> Incoherence

#### Mean differences (95% CIs) and certainty of evidence for CAL changes in parallel design

| Comparisons           | GRADE                    |                            |                          |                               |                          |                                 |
|-----------------------|--------------------------|----------------------------|--------------------------|-------------------------------|--------------------------|---------------------------------|
|                       | Direct evidence          |                            | Indirect evidence        |                               | Network meta-analysis    |                                 |
|                       | Mean difference (95% CI) | Certainty of evidence      | Mean difference (95% CI) | Certainty of evidence         | Mean difference (95% CI) | Certainty of evidence           |
| <b>aPDT MB 1% vs.</b> |                          |                            |                          |                               |                          |                                 |
| aPDT PC               | -                        | -                          | -0.19 (-0.77 to 0.39)    | ⊕⊕○○ <sup>e,c</sup><br>Low    | -0.19 (-0.77 to 0.39)    | ⊕○○○ <sup>c,f</sup><br>Very Low |
| CHX chip              | -                        | -                          | 0.11 (-0.66 to 0.88)     | ⊕⊕○○ <sup>e,c</sup><br>Low    | 0.11 (-0.66 to 0.88)     | ⊕○○○ <sup>c,f</sup><br>Very Low |
| CHX xanthan           | -                        | -                          | -0.23 (-1.05 to 0.60)    | ⊕⊕○○ <sup>e,c</sup><br>Low    | -0.23 (-1.05 to 0.60)    | ⊕○○○ <sup>c,f</sup><br>Very Low |
| DH                    | -                        | -                          | 0.45 (-0.27 to 1.17)     | ⊕⊕○○ <sup>e,c</sup><br>Low    | 0.45 (-0.27 to 1.17)     | ⊕○○○ <sup>c,f</sup><br>Very Low |
| MINO gel              | -                        | -                          | 0.30 (-0.32 to 0.92)     | ⊕⊕○○ <sup>e,c</sup><br>Low    | 0.30 (-0.32 to 0.92)     | ⊕○○○ <sup>c,f</sup><br>Very Low |
| MINO microspheres     | -                        | -                          | -0.26 (-0.78 to 0.27)    | ⊕⊕○○ <sup>e,c</sup><br>Low    | -0.26 (-0.78 to 0.27)    | ⊕○○○ <sup>c,f</sup><br>Very Low |
| PI 10%                | -                        | -                          | -0.84 (-1.79 to 0.11)    | ⊕⊕○○ <sup>e,c</sup><br>Low    | -0.84 (-1.79 to 0.11)    | ⊕○○○ <sup>c,f</sup><br>Very Low |
| placebo               | 0.22 (-0.85 to 1.29)     | ⊕⊕○○ <sup>a,c</sup><br>Low | -0.61 (-1.21 to -0.02)   | ⊕⊕⊕○ <sup>e</sup><br>Moderate | -0.42 (-0.94 to 0.10)    | ⊕⊕○○ <sup>e,c</sup><br>Low      |
| SMD                   | -0.55 (-1.09 to -0.01)   | ⊕⊕○○ <sup>a,c</sup><br>Low | 0.28 (-0.81 to 1.38)     | ⊕⊕○○ <sup>e,c</sup><br>Low    | -0.39 (-0.87 to 0.09)    | ⊕⊕○○ <sup>e,c</sup><br>Low      |
| TC                    | -                        | -                          | -0.46 (-1.46 to 0.54)    | ⊕⊕○○ <sup>e,c</sup><br>Low    | -0.46 (-1.46 to 0.54)    | ⊕○○○ <sup>c,f</sup><br>Very Low |

| <b>aPDT PC vs.</b>     |                       |                            |                       |                                 |                       |                                 |
|------------------------|-----------------------|----------------------------|-----------------------|---------------------------------|-----------------------|---------------------------------|
| CHX chip               | -                     | -                          | 0.30 (-0.39 to 0.99)  | ⊕⊕○○ <sup>e,c</sup><br>Low      | 0.30 (-0.39 to 0.99)  | ⊕○○○ <sup>c,f</sup><br>Very Low |
| CHX xanthan            | -                     | -                          | -0.04 (-0.80 to 0.72) | ⊕⊕○○ <sup>e,c</sup><br>Low      | -0.04 (-0.80 to 0.72) | ⊕○○○ <sup>c,f</sup><br>Very Low |
| DH                     | -                     | -                          | 0.64 (-0.01 to 1.29)  | ⊕⊕⊕○ <sup>e</sup><br>Moderate   | 0.64 (-0.01 to 1.29)  | ⊕⊕⊕○ <sup>e</sup><br>Moderate   |
| MINO gel               | -                     | -                          | 0.49 (-0.02 to 1.00)  | ⊕⊕○○ <sup>e,c</sup><br>Low      | 0.49 (-0.02 to 1.00)  | ⊕○○○ <sup>c,f</sup><br>Very Low |
| MINO microspheres      | -                     | -                          | -0.07 (-0.47 to 0.34) | ⊕⊕○○ <sup>e,c</sup><br>Low      | -0.07 (-0.47 to 0.34) | ⊕○○○ <sup>c,f</sup><br>Very Low |
| PI 10%                 | -                     | -                          | -0.65 (-1.53 to 0.23) | ⊕⊕○○ <sup>e,c</sup><br>Low      | -0.65 (-1.53 to 0.23) | ⊕○○○ <sup>c,f</sup><br>Very Low |
| placebo                | -                     | -                          | -0.23 (-0.64 to 0.18) | ⊕⊕○○ <sup>e,c</sup><br>Low      | -0.23 (-0.64 to 0.18) | ⊕○○○ <sup>c,f</sup><br>Very Low |
| SMD                    | -0.20 (-0.53 to 0.13) | ⊕⊕○○ <sup>a,c</sup><br>Low | -                     | -                               | -0.20 (-0.53 to 0.13) | ⊕○○○ <sup>c,f</sup><br>Very Low |
| TC                     |                       |                            | -0.27 (-1.21 to 0.66) | ⊕⊕○○ <sup>e,c</sup><br>Low      | -0.27 (-1.21 to 0.66) | ⊕○○○ <sup>c,f</sup><br>Very Low |
| <b>CHX chip vs.</b>    |                       |                            |                       |                                 |                       |                                 |
| CHX xanthan            | -                     | -                          | -0.34 (-1.25 to 0.58) | ⊕⊕○○ <sup>e,c</sup><br>Low      | -0.34 (-1.25 to 0.58) | ⊕○○○ <sup>c,f</sup><br>Very Low |
| DH                     | -                     | -                          | 0.34 (-0.48 to 1.16)  | ⊕⊕○○ <sup>e,c</sup><br>Low      | 0.34 (-0.48 to 1.16)  | ⊕○○○ <sup>c,f</sup><br>Very Low |
| MINO gel               | -                     | -                          | 0.19 (-0.53 to 0.91)  | ⊕⊕○○ <sup>e,c</sup><br>Low      | 0.19 (-0.53 to 0.91)  | ⊕○○○ <sup>c,f</sup><br>Very Low |
| MINO microspheres      | -                     | -                          | -0.37 (-1.02 to 0.28) | ⊕⊕○○ <sup>e,c</sup><br>Low      | -0.37 (-1.02 to 0.28) | ⊕○○○ <sup>c,f</sup><br>Very Low |
| PI 10%                 | -                     | -                          | -0.95 (-1.97 to 0.07) | ⊕⊕○○ <sup>e,c</sup><br>Low      | -0.95 (-1.97 to 0.07) | ⊕○○○ <sup>c,f</sup><br>Very Low |
| placebo                | -                     | -                          | -0.53 (-1.18 to 0.12) | ⊕⊕○○ <sup>e,c</sup><br>Low      | -0.53 (-1.18 to 0.12) | ⊕○○○ <sup>c,f</sup><br>Very Low |
| SMD                    | -0.50 (-1.10 to 0.10) | ⊕⊕○○ <sup>a,c</sup><br>Low | -                     | -                               | -0.50 (-1.10 to 0.10) | ⊕○○○ <sup>c,f</sup><br>Very Low |
| TC                     | -1.00 (-2.00 to 0.00) | ⊕⊕○○ <sup>a,c</sup><br>Low | 1.40 (-0.748 to 3.54) | ⊕○○○ <sup>d,f</sup><br>Very Low | -0.57 (-1.48 to 0.33) | ⊕○○○ <sup>c,f</sup><br>Very Low |
| <b>CHX xanthan vs.</b> |                       |                            |                       |                                 |                       |                                 |

|                     |                        |                               |                        |                                 |                        |                                 |
|---------------------|------------------------|-------------------------------|------------------------|---------------------------------|------------------------|---------------------------------|
| DH                  | -                      | -                             | 0.68 (-0.14 to 1.50)   | ⊕⊕○○ <sup>e,c</sup><br>Low      | 0.68 (-0.14 to 1.50)   | ⊕○○○ <sup>c,f</sup><br>Very Low |
| MINO gel            | -                      | -                             | 0.53 (-0.26 to 1.32)   | ⊕⊕○○ <sup>e,c</sup><br>Low      | 0.53 (-0.26 to 1.32)   | ⊕○○○ <sup>c,f</sup><br>Very Low |
| MINO microspheres   | -                      | -                             | -0.03 (-0.72 to 0.66)  | ⊕⊕○○ <sup>e,c</sup><br>Low      | -0.03 (-0.72 to 0.66)  | ⊕○○○ <sup>c,f</sup><br>Very Low |
| PI 10%              | -                      | -                             | -0.61 (-1.68 to 0.46)  | ⊕⊕○○ <sup>e,c</sup><br>Low      | -0.61 (-1.68 to 0.46)  | ⊕○○○ <sup>c,f</sup><br>Very Low |
| placebo             | -0.14 (-0.62 to 0.34)  | ⊕⊕○○ <sup>a,c</sup><br>Low    | -                      | -                               | -0.19 (-0.83 to 0.45)  | ⊕○○○ <sup>c,f</sup><br>Very Low |
| SMD                 | -                      | -                             | -0.16 (-0.85 to 0.53)  | ⊕⊕○○ <sup>e,c</sup><br>Low      | -0.16 (-0.85 to 0.53)  | ⊕○○○ <sup>c,f</sup><br>Very Low |
| TC                  | -                      | -                             | -0.23 (-1.35 to 0.88)  | ⊕⊕○○ <sup>e,c</sup><br>Low      | -0.23 (-1.35 to 0.88)  | ⊕○○○ <sup>c,f</sup><br>Very Low |
| <b>DH vs.</b>       |                        |                               |                        |                                 |                        |                                 |
| MINO gel            | -                      | -                             | -0.15 (-0.83 to 0.53)  | ⊕⊕○○ <sup>e,c</sup><br>Low      | -0.15 (-0.83 to 0.53)  | ⊕○○○ <sup>c,f</sup><br>Very Low |
| MINO microspheres   | -                      | -                             | -0.71 (-1.27 to -0.15) | ⊕⊕⊕○ <sup>e</sup><br>Moderate   | -0.71 (-1.27 to -0.15) | ⊕⊕⊕○ <sup>e</sup><br>Moderate   |
| PI 10%              | -                      | -                             | -1.29 (-2.28 to -0.30) | ⊕⊕○○ <sup>e,c</sup><br>Low      | -1.29 (-2.28 to -0.30) | ⊕○○○ <sup>c,f</sup><br>Very Low |
| placebo             | -0.87 (-1.37 to -0.37) | ⊕⊕⊕○ <sup>a</sup><br>Moderate | -                      | -                               | -0.87 (-1.37 to -0.37) | ⊕⊕⊕○ <sup>e</sup><br>Moderate   |
| SMD                 | -                      | -                             | -0.84 (-1.40 to -0.28) | ⊕⊕⊕○ <sup>e</sup><br>Moderate   | -0.84 (-1.40 to -0.28) | ⊕⊕⊕○ <sup>e</sup><br>Moderate   |
| TC                  | -                      | -                             | -0.91 (-1.95 to 0.13)  | ⊕○○○ <sup>d,f</sup><br>Very Low | -0.91 (-1.95 to 0.13)  | ⊕○○○ <sup>c,f</sup><br>Very Low |
| <b>MINO gel vs.</b> |                        |                               |                        |                                 |                        |                                 |
| MINO microspheres   | -                      | -                             | -0.56 (-1.01 to -0.10) | ⊕⊕⊕○ <sup>e</sup><br>Moderate   | -0.56 (-1.01 to -0.10) | ⊕⊕⊕○ <sup>e</sup><br>Moderate   |
| PI 10%              | -                      | -                             | -1.14 (-2.05 to -0.23) | ⊕⊕○○ <sup>e,c</sup><br>Low      | -1.14 (-2.05 to -0.23) | ⊕○○○ <sup>c,f</sup><br>Very Low |
| placebo             | -                      | -                             | -0.72 (-1.18 to -0.26) | ⊕⊕⊕○ <sup>e</sup><br>Moderate   | -0.72 (-1.18 to -0.26) | ⊕⊕⊕○ <sup>e</sup><br>Moderate   |
| SMD                 | -0.69 (-1.08 to -0.30) | ⊕⊕⊕○ <sup>a</sup><br>Moderate | -                      | -                               | -0.69 (-1.08 to -0.30) | ⊕⊕⊕○ <sup>e</sup><br>Moderate   |

|                              |                       |                            |                       |                                 |                       |                                 |
|------------------------------|-----------------------|----------------------------|-----------------------|---------------------------------|-----------------------|---------------------------------|
| TC                           | -                     | -                          | -0.76 (-1.72 to 0.19) | ⊕⊕○○ <sup>e,c</sup><br>Low      | -0.76 (-1.72 to 0.19) | ⊕○○○ <sup>c,f</sup><br>Very Low |
| <b>MINO microspheres vs.</b> |                       |                            |                       |                                 |                       |                                 |
| PI 10%                       | -                     | -                          | -0.58 (-1.44 to 0.27) | ⊕⊕○○ <sup>e,c</sup><br>Low      | -0.58 (-1.44 to 0.27) | ⊕○○○ <sup>c,f</sup><br>Very Low |
| placebo                      | -0.15 (-0.41 to 0.10) | ⊕⊕○○ <sup>a,c</sup><br>Low | -0.34 (-1.49 to 0.81) | ⊕⊕○○ <sup>e,c</sup><br>Low      | -0.16 (-0.41 to 0.09) | ⊕○○○ <sup>c,f</sup><br>Very Low |
| SMD                          | -0.12 (-0.36 to 0.12) | ⊕⊕○○ <sup>a,c</sup><br>Low | -1.79 (-4.22 to 0.65) | ⊕○○○ <sup>d,f</sup><br>Very Low | -0.13 (-0.37 to 0.11) | ⊕○○○ <sup>c,f</sup><br>Very Low |
| TC                           | -                     | -                          | -0.21 (-1.11 to 0.70) | ⊕⊕○○ <sup>e,c</sup><br>Low      | -0.21 (-1.11 to 0.70) | ⊕○○○ <sup>c,f</sup><br>Very Low |
| <b>PI 10% vs.</b>            |                       |                            |                       |                                 |                       |                                 |
| placebo                      | -                     | -                          | 0.42 (-0.43 to 1.28)  | ⊕⊕○○ <sup>e,c</sup><br>Low      | 0.42 (-0.43 to 1.28)  | ⊕○○○ <sup>c,f</sup><br>Very Low |
| SMD                          | -0.45 (-1.27 to 0.37) | ⊕⊕○○ <sup>a,c</sup><br>Low | -                     | -                               | 0.45 (-0.37 to 1.27)  | ⊕○○○ <sup>c,f</sup><br>Very Low |
| TC                           | -                     | -                          | 0.38 (-0.82 to 1.58)  | ⊕⊕○○ <sup>e,c</sup><br>Low      | 0.38 (-0.82 to 1.58)  | ⊕○○○ <sup>c,f</sup><br>Very Low |
| <b>Placebo vs.</b>           |                       |                            |                       |                                 |                       |                                 |
| SMD                          | -0.09 (-0.35 to 0.16) | ⊕⊕○○ <sup>a,c</sup><br>Low | -0.73 (-1.62 to 0.16) | ⊕⊕○○ <sup>e,c</sup><br>Low      | 0.03 (-0.22 to 0.27)  | ⊕○○○ <sup>c,f</sup><br>Very Low |
| TC                           | -                     | -                          | -0.04 (-0.95 to 0.87) | ⊕⊕○○ <sup>e,c</sup><br>Low      | -0.04 (-0.95 to 0.87) | ⊕○○○ <sup>c,f</sup><br>Very Low |
| <b>TC vs. SMD</b>            | -0.25 (-1.18 to 0.68) | ⊕⊕○○ <sup>a,c</sup><br>Low | 2.53 (-0.04 to 5.10)  | ⊕○○○ <sup>d,f</sup><br>Very Low | 0.07 (-0.80 to 0.95)  | ⊕○○○ <sup>c,f</sup><br>Very Low |

<sup>a</sup> Limitations (risk of bias). <sup>b</sup> Inconsistency. <sup>c</sup> Imprecision. <sup>d</sup> Severe imprecision. <sup>e</sup> Contributing evidence of moderate quality. <sup>f</sup> Contributing evidence of low or very low quality. <sup>g</sup> Incoherence



**Table S9.** Subgroup analyses of specific parameters for included studies.

| Split mouth studies       |                   |                    |      |      |             |                    |              |      |             |                    |                    |
|---------------------------|-------------------|--------------------|------|------|-------------|--------------------|--------------|------|-------------|--------------------|--------------------|
| Variables                 | Number of studies | Number of patients |      | PPD  |             |                    |              | CAL  |             |                    |                    |
|                           |                   | Control            | Test | MD   | 95% CI      | I <sup>2</sup> (%) | p-value      | MD   | 95% CI      | I <sup>2</sup> (%) | p-value            |
| <b>Duration</b>           |                   |                    |      |      |             |                    | <b>0.002</b> |      |             |                    | <b>&lt; 0.0001</b> |
| Medium                    | 15                | 388                | 388  | 0.2  | 0.21; 0.63  | 68.5               |              | 0.29 | 0.08; 0.51  | 54.7               |                    |
| Long                      | 1                 | 36                 | 36   | 0.93 | 0.69; 1.17  | -                  |              | 1.20 | 1.05; 1.35  | -                  |                    |
| <b>Smoking status</b>     |                   |                    |      |      |             |                    | <b>0.01</b>  |      |             |                    | <b>0.20</b>        |
| Smoker                    | 3                 | 135                | 135  | 0.87 | 0.61; 1.12  | 0                  |              | 0.63 | 0.35; 0.92  | 0                  |                    |
| Nonsmoker                 | 13                | 289                | 289  | 0.41 | 0.18; 0.65  | 75.1               |              | 0.32 | -0.07; 0.71 | 90.3               |                    |
| <b>Treatment phase</b>    |                   |                    |      |      |             |                    | <b>0.34</b>  |      |             |                    | <b>0.50</b>        |
| Untreated                 | 14                | 376                | 376  | 0.48 | 0.25; 0.71  | 76.7               |              | 0.34 | -0.01; 0.69 | 89.5               |                    |
| Recurrent                 | 2                 | 48                 | 48   | 0.22 | -0.26; 0.71 | 0                  |              | 0.64 | -0.15; 1.42 | 0                  |                    |
| <b>Treatment area</b>     |                   |                    |      |      |             |                    | <b>0.28</b>  |      |             |                    | <b>0.43</b>        |
| Partial mouth             | 12                | 354                | 354  | 0.39 | 0.15; 0.62  | 69.9               |              | 0.31 | -0.13; 0.74 | 90.6               |                    |
| Full mouth                | 4                 | 70                 | 70   | 0.68 | 0.20; 1.16  | 80.2               |              | 0.54 | 0.16; 0.91  | 56.7               |                    |
| <b>Debridement method</b> |                   |                    |      |      |             |                    | <b>0.93</b>  |      |             |                    | <b>0.62</b>        |
| SRP                       | 15                | 397                | 397  | 0.46 | 0.24; 0.68  | 75.8               |              | 0.36 | 0.02; 0.69  | 88.7               |                    |
| U/S                       | 1                 | 27                 | 27   | 0.50 | -0.37; 1.37 | -                  |              | 0.70 | -0.62; 2.02 | -                  |                    |
| <b>Control group</b>      |                   |                    |      |      |             |                    | <b>0.79</b>  |      |             |                    | <b>0.47</b>        |
| SMD                       | 13                | 337                | 337  | 0.44 | 0.21; 0.68  | 71                 |              | 0.31 | 0.07; 0.54  | 59.7               |                    |
| Placebo                   | 3                 | 87                 | 87   | 0.53 | -0.09; 1.15 | 84.7               |              | 0.66 | -0.26; 1.59 | 89.9               |                    |
| <b>Funding source</b>     |                   |                    |      |      |             |                    | <b>0.97</b>  |      |             |                    | <b>0.70</b>        |
| Commercial                | 3                 | 135                | 135  | 0.47 | -0.07; 1.01 | 0                  |              | 0.50 | -0.20; 1.20 | 0                  |                    |
| Noncommercial             | 13                | 289                | 289  | 0.46 | 0.22; 0.69  | 79.2               |              | 0.35 | -0.01; 0.70 | 90.3               |                    |
| Parallel studies          |                   |                    |      |      |             |                    |              |      |             |                    |                    |
| <b>Duration</b>           |                   |                    |      |      |             |                    | <b>0.50</b>  |      |             |                    | <b>0.04</b>        |
| Medium                    | 12                | 460                | 453  | 0.28 | 0.10; 0.47  | 62.1               |              | 0.28 | 0.08; 0.48  | 55.8               |                    |
| Long                      | 1                 | 16                 | 16   | 0.62 | -0.34; 1.58 | -                  |              | 1.25 | 0.32; 2.18  | -                  |                    |
| <b>Smoking status</b>     |                   |                    |      |      |             |                    | <b>0.27</b>  |      |             |                    | <b>0.32</b>        |
| Smoker                    | 7                 | 339                | 337  | 0.21 | 0.01; 0.41  | 57.3               |              | 0.22 | 0.02; 0.43  | 49.1               |                    |
| Nonsmoker                 | 6                 | 137                | 132  | 0.44 | 0.10; 0.77  | 56.9               |              | 0.47 | 0.04; 0.89  | 60                 |                    |
| <b>Treatment phase</b>    |                   |                    |      |      |             |                    | <b>0.13</b>  |      |             |                    | <b>0.56</b>        |
| Untreated                 | 11                | 453                | 447  | 0.34 | 0.14; 0.54  | 61.2               |              | 0.33 | 0.09; 0.57  | 65.3               |                    |
| Recurrent                 | 2                 | 23                 | 22   | 0.07 | -0.22; 0.36 | 0                  |              | 0.20 | -0.20; 0.59 | 0                  |                    |
| <b>Treatment area</b>     |                   |                    |      |      |             |                    | <b>0.82</b>  |      |             |                    | <b>0.32</b>        |

|                           |    |     |     |       |             |      |             |             |             |
|---------------------------|----|-----|-----|-------|-------------|------|-------------|-------------|-------------|
| Partial mouth             | 6  | 115 | 109 | 0.26  | -0.06; 0.58 | 50.2 | 0.47        | 0.08; 0.86  | 48.6        |
| Full mouth                | 7  | 361 | 360 | 0.31  | 0.08; 0.50  | 68.7 | 0.23        | -0.00; 0.47 | 62.4        |
| <b>Debridement method</b> |    |     |     |       |             |      | <b>0.10</b> |             | <b>0.05</b> |
| SRP                       | 12 | 462 | 455 | 0.32  | 0.14; 0.51  | 58.1 | 0.35        | 0.15; 0.55  | 56.9        |
| U/S                       | 1  | 14  | 14  | -0.08 | -0.53; 0.37 | -    | -0.45       | -1.24; 0.34 | -           |
| <b>Control group</b>      |    |     |     |       |             |      | <b>0.71</b> |             | <b>0.75</b> |
| SMD                       | 10 | 414 | 413 | 0.27  | 0.07; 0.48  | 62.5 | 0.28        | 0.06; 0.50  | 57.9        |
| Placebo                   | 3  | 62  | 56  | 0.37  | -0.09; 0.82 | 61.2 | 0.39        | -0.23; 1.01 | 63.2        |
| <b>Funding source</b>     |    |     |     |       |             |      | <b>0.03</b> |             | <b>0.02</b> |
| Commercial                | 6  | 310 | 308 | 0.16  | 0.03; 0.30  | 0    | 0.11        | -0.05; 0.26 | 0           |
| Noncommercial             | 7  | 166 | 161 | 0.49  | 0.23; 0.76  | 52.4 | 0.53        | 0.21; 0.85  | 53.9        |
